# Supplementary material
Source: PubMed Central journal article supplement (PMC8860302)
Supplement: ehp9324.s001.acco.pdf [file ehp9324.s001.acco.pdf]

**Note to readers with disabilities:** *EHP* strives to ensure that all journal content is accessible to all readers. However, some figures and Supplemental Material published in *EHP* articles may not conform to [508 standards](#) due to the complexity of the information being presented. If you need assistance accessing journal content, please contact [ehp508@niehs.nih.gov](mailto:ehp508@niehs.nih.gov). Our staff will work with you to assess and meet your accessibility needs within 3 working days.

### **Supplemental Material**

#### **Projecting Temperature-Attributable Mortality and Hospital Admissions due to Enteric Infections in the Philippines**

Paul L.C. Chua, Chris Fook Sheng Ng, Lina Madaniyazi, Xerxes Seposo, Miguel Antonio Salazar, Veronika Huber, and Masahiro Hashizume

#### **Table of Contents**

**Table S1.** Regional sociodemographic profiles.

**Table S2.** Number and proportion of etiologies of mortality due to enteric infections by Philippine region in 2014–2017.

**Table S3.** Number and proportion of etiologies of hospital admissions due to enteric infections by Philippine region in 2014–2017.

**Table S4.** Number and proportion of mortality due to enteric infections by Philippine region and age-groups in 2014–2017.

**Table S5.** Number and proportion of hospital admissions due to enteric infections by Philippine region and age-groups in 2014–2017.

**Table S6.** Number and proportion of physician-attended and unattended mortality due to enteric infections by Philippine region in 2014–2017.

**Table S7.** Philippine-level projected general circulation model-ensemble mean temperatures by Representative Concentration Pathways (RCPs) and decade based on the Inter-Sectoral Impact Model Intercomparison Project 2b.

**Table S8.** Philippine-level projected mean annual population in millions by Shared Socioeconomic Pathways (SSPs) and decade based on the Inter-Sectoral Impact Model Intercomparison Project 2b.

**Table S9.** Heterogeneity of multivariate meta-regression models for Philippine temperature–enteric infection associations in 2014–2017.

**Table S10.** Relative risks of cumulative 2-metre temperature–enteric infections associations by high and low temperatures relative to minimum risk temperatures in 2014–2017.

**Table S11.** Philippines-level temperature-attributable fractions of deaths due to enteric infections relative to 2010–2019 with no population change by Representative Concentration Pathway (RCP) scenarios, temperature range, and decade.

**Table S12.** Philippines-level temperature-attributable fractions of hospital admissions due to enteric infections relative to 2010–2019 with no population change by Representative Concentration Pathway (RCP) scenarios, temperature range, and decade.

**Table S13.** Regional temperature-attributable fractions of deaths and hospital admissions due to enteric infections in 2090–2099 relative to 2010–2019 by representative concentration pathways and no population change.

**Table S14.** Regional temperature-attributable numbers of deaths and hospital admissions due to enteric infections in 2090–2099 relative to 2010–2019 by representative concentration pathways and no population change.

**Table S15.** Regional temperature-attributable numbers of deaths due to enteric infections in 2090–2099 relative to 2010–2019 by representative concentration pathways and shared socioeconomic pathways.

**Table S16.** Regional temperature-attributable numbers of hospital admissions due to enteric infections in 2090–2099 relative to 2010–2019 by representative concentration pathways and shared socioeconomic pathways.

**Figure S1.** Philippine administrative regions.

**Figure S2.** Annual deaths and hospital admissions due to enteric infections in the Philippines in 2006–2018.

**Figure S3.** Average 2-meter temperatures per administrative region.

**Figure S4.** Weather stations in the Philippines. Black dots have imputable mean temperature data and white dots have more than 10% missing data.

**Figure S5.** Likely and unlikely combinations of Shared Socioeconomic Pathways (SSP) and Representative Concentration Pathways (RCP) expressed in radiative forcing.

**Figure S6.** Decadal temperature difference relative to 2010–2019 according to representative concentration pathways (RCPs) shown by Philippine region.

**Figure S7.** Decadal population difference relative to 2010–2019 according to shared socioeconomic pathways (SSPs) shown by Philippine region.

**Figure S8. Cumulative temperature–enteric infection mortality associations by Philippine region in 2014–2017.** Solid lines refer to mean relative risks, dashed lines refer to minimum risk temperatures, shaded regions refer to 95% empirical confidence intervals, and grey histograms refer to distribution of daily temperatures.

**Figure S9. Cumulative temperature–enteric infection hospital admissions associations by Philippine region in 2014–2017.** Solid lines refer to mean relative risks, dashed lines refer to minimum risk temperatures, shaded regions refer to 95% empirical confidence intervals, and grey histograms refer to distribution of daily temperatures.

**Figure S10.** Regional cumulative temperature–enteric infection mortality associations for 2014–2017 adjusting to confounders (sensitivity analysis).

**Figure S11.** Regional cumulative temperature–enteric infection hospital admissions associations for 2014–2017 adjusting to confounders (sensitivity analysis).

**Figure S12.** Regional cumulative temperature–enteric infection mortality associations for 2014–2017 with population as offset (sensitivity analysis).

**Figure S13.** Regional cumulative temperature–enteric infection hospital admission associations for 2014–2017 with population as offset (sensitivity analysis).

**Figure S14.** Regional cumulative temperature–enteric infection mortality associations for 2014–2017 changing maximum lag days (sensitivity analysis).

**Figure S15.** Regional cumulative temperature–enteric infection hospital admissions associations for 2014–2017 changing maximum lag days (sensitivity analysis).

**Figure S16.** Regional cumulative temperature–enteric infection mortality associations for 2014–2017 changing degrees of freedom for time or day (sensitivity analysis).

**Figure S17.** Regional cumulative temperature–enteric infection hospital admissions for 2014–2017 associations changing degrees of freedom for time or day (sensitivity analysis).

**Figure S18. Regional cumulative temperature–enteric infection mortality associations using weather stations daily mean temperatures for 2014–2017 (sensitivity analysis).** Solid lines refer to mean relative risks, dashed lines refer to minimum risk temperatures, shaded regions refer to 95% empirical confidence intervals, and grey histograms refer to distribution of daily temperatures.

**Figure S19. Regional cumulative temperature–enteric infection hospital admission associations using weather stations daily mean temperatures for 2014–2017 (sensitivity analysis).** Solid lines refer to mean relative risks, dashed lines refer to minimum risk temperatures, shaded regions refer to 95% empirical confidence intervals, and grey histograms refer to distribution of daily temperatures.

**Figure S20. General circulation model-ensemble temperature-attributable fractions of enteric infections relative to 2010–2019 by outcome in the Philippines using weather stations data (sensitivity analysis).** Striped bars refer to high temperature-attributable enteric infections, dotted bars refer to low temperature-attributable enteric infections, black circles refer to total temperature-attributable enteric infections, and error bars refer to 95%eCI.

## Supplementary material

**Table S1. Regional sociodemographic profiles**

| Major island group | Regions                                                 | GRDP per capita in 2017 <sup>a</sup> | Population density in 2015 <sup>b</sup> | Water coverage (%) in 2017 <sup>c</sup> | Toilet coverage (%) in 2017 <sup>d</sup> |
|--------------------|---------------------------------------------------------|--------------------------------------|-----------------------------------------|-----------------------------------------|------------------------------------------|
| Luzon              | Cordillera Autonomous Region (CAR)                      | 159,756                              | 87                                      | 73.30                                   | 85.76                                    |
|                    | Ilocos Region (Region 1)                                | 102,915                              | 388                                     | 96.84                                   | 93.85                                    |
|                    | Cagayan Valley (Region 2)                               | 101,390                              | 116                                     | 86.24                                   | 88.62                                    |
|                    | Central Luzon (Region 3)                                | 159,443                              | 512                                     | 91.49                                   | 92.38                                    |
|                    | National Capital Region (NCR)                           | 401,598                              | 20,785                                  | 98.60                                   | 94.94                                    |
|                    | Calabarzon (Region 4A)                                  | 160,625                              | 870                                     | 95.97                                   | 92.31                                    |
|                    | Southwestern Tagalog Region (Region 4B)                 | 105,511                              | 100                                     | 88.88                                   | 79.13                                    |
| Visayas            | Bicol Region (Region 5)                                 | 78,481                               | 320                                     | 85.96                                   | 76.60                                    |
|                    | Western Visayas (Region 6)                              | 102,914                              | 363                                     | 89.86                                   | 83.90                                    |
|                    | Central Visayas (Region 7)                              | 139,860                              | 466                                     | 91.04                                   | 80.03                                    |
| Mindanao           | Eastern Visayas (Region 8)                              | 87,192                               | 191                                     | 85.03                                   | 79.22                                    |
|                    | Zamboanga Peninsula (Region 9)                          | 93,325                               | 215                                     | 91.43                                   | 83.48                                    |
|                    | Northern Mindanao (Region 10)                           | 152,911                              | 229                                     | 93.26                                   | 84.49                                    |
|                    | Davao Region (Region 11)                                | 148,272                              | 239                                     | 92.46                                   | 85.52                                    |
|                    | Soccsksargen (Region 12)                                | 100,120                              | 199                                     | 87.26                                   | 83.29                                    |
|                    | Caraga (Region 13)                                      | 102,656                              | 123                                     | 91.04                                   | 83.99                                    |
|                    | Bangsamoro Autonomous Region of Muslim Mindanao (BARMM) | 47,471                               | 103                                     | 52.71                                   | 26.87                                    |

<sup>a</sup>Gross regional domestic product per capital in year 2017 expressed in Philippine pesos at October 2020 prices reported by the Philippine Statistics Authority

<sup>b</sup>Population density in year 2015 expressed in persons per square kilometre reported by the Philippine Statistics Authority. The latest available census was in year 2015.

<sup>c</sup>Percentage of households with access to improve safe water supply in year 2017 reported by the Department of Health

<sup>d</sup>Percentage of households with sanitary toilet in year 2017 reported by the Department of Health

**Table S2. Number and proportion of etiologies of mortality due to enteric infections by Philippine region in 2014–2017**

| Region | Total deaths | A00 (%)  | A01 (%)    | A02 (%) | A03 (%) | A04 (%) | A05 (%) | A06 (%)   | A07 (%) | A08 (%)  | A09 (%)     |
|--------|--------------|----------|------------|---------|---------|---------|---------|-----------|---------|----------|-------------|
| CAR    | 219          | 1 (0.5)  | 26 (11.9)  | 0 (0)   | 0 (0)   | 2 (0.9) | 0 (0)   | 10 (4.6)  | 0 (0)   | 1 (0.5)  | 179 (81.7)  |
| 1      | 839          | 0 (0)    | 74 (8.8)   | 1 (0.1) | 0 (0)   | 4 (0.5) | 1 (0.1) | 32 (3.8)  | 2 (0.2) | 5 (0.6)  | 720 (85.8)  |
| 2      | 621          | 4 (0.6)  | 53 (8.5)   | 0 (0)   | 0 (0)   | 5 (0.8) | 0 (0)   | 24 (3.9)  | 0 (0)   | 3 (0.5)  | 532 (85.7)  |
| 3      | 1458         | 0 (0)    | 43 (2.9)   | 0 (0)   | 0 (0)   | 3 (0.2) | 2 (0.1) | 68 (4.7)  | 0 (0)   | 3 (0.2)  | 1339 (91.8) |
| NCR    | 2067         | 2 (0.1)  | 49 (2.4)   | 5 (0.2) | 1 (0)   | 20 (1)  | 2 (0.1) | 134 (6.5) | 2 (0.1) | 4 (0.2)  | 1848 (89.4) |
| 4A     | 2090         | 1 (0)    | 62 (3)     | 1 (0)   | 0 (0)   | 1 (0)   | 0 (0)   | 93 (4.4)  | 1 (0)   | 16 (0.8) | 1915 (91.6) |
| 4B     | 502          | 2 (0.4)  | 46 (9.2)   | 1 (0.2) | 0 (0)   | 0 (0)   | 4 (0.8) | 18 (3.6)  | 0 (0)   | 2 (0.4)  | 429 (85.5)  |
| 5      | 1285         | 2 (0.2)  | 134 (10.4) | 2 (0.2) | 0 (0)   | 5 (0.4) | 2 (0.2) | 42 (3.3)  | 0 (0)   | 4 (0.3)  | 1094 (85.1) |
| 6      | 2033         | 12 (0.6) | 334 (16.4) | 1 (0)   | 1 (0)   | 6 (0.3) | 1 (0)   | 100 (4.9) | 1 (0)   | 5 (0.2)  | 1572 (77.3) |
| 7      | 2092         | 1 (0)    | 184 (8.8)  | 4 (0.2) | 2 (0.1) | 5 (0.2) | 1 (0)   | 51 (2.4)  | 0 (0)   | 15 (0.7) | 1829 (87.4) |
| 8      | 989          | 1 (0.1)  | 107 (10.8) | 1 (0.1) | 1 (0.1) | 8 (0.8) | 1 (0.1) | 40 (4)    | 0 (0)   | 2 (0.2)  | 828 (83.7)  |
| 9      | 887          | 2 (0.2)  | 107 (12.1) | 0 (0)   | 0 (0)   | 0 (0)   | 4 (0.5) | 27 (3)    | 0 (0)   | 3 (0.3)  | 744 (83.9)  |
| 10     | 1035         | 4 (0.4)  | 110 (10.6) | 0 (0)   | 0 (0)   | 2 (0.2) | 1 (0.1) | 52 (5)    | 0 (0)   | 7 (0.7)  | 859 (83)    |
| 11     | 826          | 1 (0.1)  | 61 (7.4)   | 2 (0.2) | 0 (0)   | 0 (0)   | 0 (0)   | 58 (7)    | 1 (0.1) | 1 (0.1)  | 702 (85)    |
| 12     | 724          | 0 (0)    | 66 (9.1)   | 2 (0.3) | 0 (0)   | 1 (0.1) | 0 (0)   | 34 (4.7)  | 0 (0)   | 5 (0.7)  | 616 (85.1)  |
| 13     | 518          | 1 (0.2)  | 45 (8.7)   | 1 (0.2) | 0 (0)   | 0 (0)   | 2 (0.4) | 29 (5.6)  | 0 (0)   | 0 (0)    | 440 (84.9)  |

|             |       |          |            |          |       |          |          |           |       |          |            |
|-------------|-------|----------|------------|----------|-------|----------|----------|-----------|-------|----------|------------|
| BARMM       | 202   | 1 (0.5)  | 22 (10.9)  | 0 (0)    | 0 (0) | 1 (0.5)  | 1 (0.5)  | 2 (1)     | 0 (0) | 0 (0)    | 175 (86.6) |
| Philippines | 18387 | 35 (0.2) | 1523 (8.3) | 21 (0.1) | 5 (0) | 63 (0.3) | 22 (0.1) | 814 (4.4) | 7 (0) | 76 (0.4) | 15821 (86) |

A00=cholera; A01=typhoid and paratyphoid fevers; A02=other salmonella infections; A03=shigellosis; A04=other bacterial intestinal infections; A05=other bacterial foodborne intoxications; A06=amebiasis; A07=other protozoal intestinal diseases; A08=viral and other specific intestinal infections; A09=infectious gastroenteritis and colitis, unspecified;

NCR=National Capital Region; CAR=Cordillera Autonomous Region; BARMM=Bangsamoro Autonomous Region of Muslim Mindanao

Note: Table S1 lists the full names of the regions.

**Table S3. Number and proportion of etiologies of hospital admissions due to enteric infections by Philippine region in 2014–2017**

| Region | Total deaths | A00 (%) | A01 (%)      | A02 (%)    | A03 (%)  | A04 (%)   | A05 (%)   | A06 (%)      | A07 (%)   | A08 (%)   | A09 (%)       |
|--------|--------------|---------|--------------|------------|----------|-----------|-----------|--------------|-----------|-----------|---------------|
| CAR    | 55827        | 0 (0)   | 13023 (23.3) | 45 (0.1)   | 14 (0)   | 518 (0.9) | 53 (0.1)  | 4015 (7.2)   | 92 (0.2)  | 90 (0.2)  | 37977 (68)    |
| 1      | 141374       | 20 (0)  | 18575 (13.1) | 426 (0.3)  | 18 (0)   | 231 (0.2) | 82 (0.1)  | 6467 (4.6)   | 208 (0.1) | 483 (0.3) | 114864 (81.2) |
| 2      | 83985        | 2 (0)   | 9525 (11.3)  | 115 (0.1)  | 11 (0)   | 176 (0.2) | 79 (0.1)  | 4424 (5.3)   | 60 (0.1)  | 92 (0.1)  | 69501 (82.8)  |
| 3      | 161815       | 5 (0)   | 8096 (5)     | 81 (0.1)   | 14 (0)   | 381 (0.2) | 112 (0.1) | 13136 (8.1)  | 59 (0)    | 169 (0.1) | 139762 (86.4) |
| NCR    | 104952       | 50 (0)  | 4686 (4.5)   | 283 (0.3)  | 98 (0.1) | 719 (0.7) | 186 (0.2) | 8339 (7.9)   | 191 (0.2) | 715 (0.7) | 89685 (85.5)  |
| 4A     | 201930       | 8 (0)   | 28805 (14.3) | 1227 (0.6) | 14 (0)   | 357 (0.2) | 94 (0)    | 17972 (8.9)  | 140 (0.1) | 177 (0.1) | 153136 (75.8) |
| 4B     | 46361        | 5 (0)   | 7800 (16.8)  | 1244 (2.7) | 7 (0)    | 68 (0.1)  | 62 (0.1)  | 1995 (4.3)   | 461 (1)   | 70 (0.2)  | 34649 (74.7)  |
| 5      | 85360        | 19 (0)  | 8860 (10.4)  | 316 (0.4)  | 11 (0)   | 165 (0.2) | 68 (0.1)  | 3072 (3.6)   | 217 (0.3) | 86 (0.1)  | 72546 (85)    |
| 6      | 126475       | 2 (0)   | 14216 (11.2) | 325 (0.3)  | 4 (0)    | 108 (0.1) | 34 (0)    | 9798 (7.7)   | 105 (0.1) | 147 (0.1) | 101736 (80.4) |
| 7      | 134414       | 6 (0)   | 6616 (4.9)   | 289 (0.2)  | 83 (0.1) | 189 (0.1) | 221 (0.2) | 15035 (11.2) | 578 (0.4) | 258 (0.2) | 111139 (82.7) |

|             |         |               |                  |               |          |               |               |                 |               |               |                   |
|-------------|---------|---------------|------------------|---------------|----------|---------------|---------------|-----------------|---------------|---------------|-------------------|
| 8           | 111210  | 901 (0.8)     | 4964<br>(4.5)    | 51 (0)        | 94 (0.1) | 70 (0.1)      | 189 (0.2)     | 5103<br>(4.6)   | 59 (0.1)      | 752 (0.7)     | 99027<br>(89)     |
| 9           | 92972   | 15 (0)        | 16015<br>(17.2)  | 28 (0)        | 2 (0)    | 46 (0)        | 63 (0.1)      | 5119<br>(5.5)   | 46 (0)        | 56 (0.1)      | 71582<br>(77)     |
| 10          | 171078  | 2 (0)         | 35065<br>(20.5)  | 169 (0.1)     | 20 (0)   | 37 (0)        | 206 (0.1)     | 17280<br>(10.1) | 3053<br>(1.8) | 210 (0.1)     | 115036<br>(67.2)  |
| 11          | 149460  | 0 (0)         | 17226<br>(11.5)  | 152 (0.1)     | 16 (0)   | 134 (0.1)     | 34 (0)        | 17405<br>(11.6) | 593 (0.4)     | 148 (0.1)     | 113752<br>(76.1)  |
| 12          | 178298  | 282 (0.2)     | 37383<br>(21)    | 671 (0.4)     | 23 (0)   | 148 (0.1)     | 50 (0)        | 11832<br>(6.6)  | 254 (0.1)     | 80 (0)        | 127575<br>(71.6)  |
| 13          | 66589   | 2 (0)         | 6263<br>(9.4)    | 71 (0.1)      | 7 (0)    | 31 (0)        | 124 (0.2)     | 7885<br>(11.8)  | 310 (0.5)     | 213 (0.3)     | 51683<br>(77.6)   |
| BARMM       | 92168   | 6 (0)         | 13298<br>(14.4)  | 51 (0.1)      | 3 (0)    | 44 (0)        | 32 (0)        | 3002<br>(3.3)   | 40 (0)        | 24 (0)        | 75668<br>(82.1)   |
| Philippines | 2004268 | 1325<br>(0.1) | 250416<br>(12.5) | 5544<br>(0.3) | 439 (0)  | 3422<br>(0.2) | 1689<br>(0.1) | 151879<br>(7.6) | 6466<br>(0.3) | 3770<br>(0.2) | 1579318<br>(78.8) |

A00=cholera; A01=typhoid and paratyphoid fevers; A02=other salmonella infections; A03=shigellosis; A04=other bacterial intestinal infections; A05=other bacterial foodborne intoxications; A06=amebiasis; A07=other protozoal intestinal diseases; A08=viral and other specific intestinal infections; A09=infectious gastroenteritis and colitis, unspecified;

NCR=National Capital Region; CAR=Cordillera Autonomous Region; BARMM=Bangsamoro Autonomous Region of Muslim Mindanao

Note: Table S1 lists the full names of the regions.



**Table S4. Number and proportion of mortality due to enteric infections by Philippine region and age-groups in 2014–2017**

| Region      | Number of deaths (%) |                |               |
|-------------|----------------------|----------------|---------------|
|             | ≤5 years old         | 6-64 years old | 65≥ years old |
| CAR         | 36 (16.44)           | 71 (32.42)     | 112 (51.14)   |
| 1           | 291 (34.68)          | 266 (31.7)     | 282 (33.61)   |
| 2           | 154 (24.84)          | 217 (35)       | 249 (40.16)   |
| 3           | 708 (48.56)          | 406 (27.85)    | 344 (23.59)   |
| NCR         | 1116 (54.2)          | 634 (30.79)    | 309 (15.01)   |
| 4A          | 1010 (48.33)         | 617 (29.52)    | 463 (22.15)   |
| 4B          | 195 (38.84)          | 178 (35.46)    | 129 (25.7)    |
| 5           | 564 (43.89)          | 452 (35.18)    | 269 (20.93)   |
| 6           | 557 (27.41)          | 769 (37.84)    | 706 (34.74)   |
| 7           | 891 (42.59)          | 622 (29.73)    | 579 (27.68)   |
| 8           | 324 (32.79)          | 345 (34.92)    | 319 (32.29)   |
| 9           | 289 (32.58)          | 357 (40.25)    | 241 (27.17)   |
| 10          | 349 (33.75)          | 376 (36.36)    | 309 (29.88)   |
| 11          | 303 (36.68)          | 317 (38.38)    | 206 (24.94)   |
| 12          | 261 (36.05)          | 274 (37.85)    | 189 (26.1)    |
| 13          | 189 (36.49)          | 184 (35.52)    | 145 (27.99)   |
| BARMM       | 97 (48.26)           | 70 (34.83)     | 34 (16.92)    |
| Philippines | 7347 (39.96)         | 6168 (33.55)   | 4898 (26.64)  |

**Table S5. Number and proportion of hospital admissions due to enteric infections by Philippine region and age-groups in 2014–2017**

| Region      | Number of hospital admissions (%) |                |               |
|-------------|-----------------------------------|----------------|---------------|
|             | ≤5 years old                      | 6-64 years old | 65≥ years old |
| CAR         | 24363 (43.64)                     | 26487 (47.44)  | 4977 (8.92)   |
| 1           | 59123 (41.82)                     | 65418 (46.27)  | 16833 (11.91) |
| 2           | 40284 (47.97)                     | 35643 (42.44)  | 8058 (9.59)   |
| 3           | 87779 (54.25)                     | 59856 (36.99)  | 14180 (8.76)  |
| NCR         | 54140 (51.59)                     | 45030 (42.91)  | 5782 (5.51)   |
| 4A          | 93568 (46.34)                     | 93500 (46.3)   | 14862 (7.36)  |
| 4B          | 21457 (46.28)                     | 20838 (44.95)  | 4066 (8.77)   |
| 5           | 37508 (43.94)                     | 39252 (45.98)  | 8600 (10.07)  |
| 6           | 53894 (42.61)                     | 60305 (47.68)  | 12276 (9.71)  |
| 7           | 60314 (44.87)                     | 63536 (47.27)  | 10564 (7.86)  |
| 8           | 60116 (54.06)                     | 44249 (39.79)  | 6845 (6.16)   |
| 9           | 43055 (46.31)                     | 44550 (47.92)  | 5367 (5.77)   |
| 10          | 77777 (45.46)                     | 83937 (49.06)  | 9364 (5.47)   |
| 11          | 68847 (46.06)                     | 72343 (48.4)   | 8270 (5.53)   |
| 12          | 74776 (41.94)                     | 94573 (53.04)  | 8949 (5.02)   |
| 13          | 30705 (46.11)                     | 30645 (46.02)  | 5239 (7.87)   |
| BARMM       | 35433 (38.44)                     | 52874 (57.37)  | 3861 (4.19)   |
| Philippines | 923139 (46.06)                    | 933036 (46.55) | 148093 (7.39) |

**Table S6. Number and proportion of physician-attended and unattended mortality due to enteric infections by Philippine region in 2014–2017**

| Region      | Number of physician-attended deaths (%) |               |
|-------------|-----------------------------------------|---------------|
|             | Unattended                              | Attended      |
| CAR         | 93 (42.47)                              | 126 (57.53)   |
| 1           | 297 (35.4)                              | 542 (64.6)    |
| 2           | 283 (45.57)                             | 338 (54.43)   |
| 3           | 613 (42.04)                             | 845 (57.96)   |
| NCR         | 594 (28.74)                             | 1473 (71.26)  |
| 4A          | 903 (43.21)                             | 1187 (56.79)  |
| 4B          | 249 (49.6)                              | 253 (50.4)    |
| 5           | 589 (45.84)                             | 696 (54.16)   |
| 6           | 757 (37.24)                             | 1276 (62.76)  |
| 7           | 847 (40.49)                             | 1245 (59.51)  |
| 8           | 457 (46.21)                             | 532 (53.79)   |
| 9           | 390 (43.97)                             | 497 (56.03)   |
| 10          | 395 (38.16)                             | 640 (61.84)   |
| 11          | 298 (36.08)                             | 528 (63.92)   |
| 12          | 330 (45.58)                             | 394 (54.42)   |
| 13          | 226 (43.63)                             | 292 (56.37)   |
| BARMM       | 77 (38.12)                              | 125 (61.88)   |
| Philippines | 7398 (40.23)                            | 10989 (59.77) |

**Table S7. Philippine-level projected general circulation model-ensemble mean temperatures by Representative Concentration Pathways (RCPs) and decade based on the Inter-Sectoral Impact Model Intercomparison Project 2b**

| Decade  | Mean temperatures in °C (difference from 2010-19) |              |              |              |
|---------|---------------------------------------------------|--------------|--------------|--------------|
|         | RCP 2.6                                           | RCP 4.5      | RCP 6.0      | RCP 8.5      |
| 2010-19 | 25.5 (0)                                          | 25.51 (0)    | 25.48 (0)    | 25.58 (0)    |
| 2020-29 | 25.79 (0.29)                                      | 25.79 (0.28) | 25.71 (0.22) | 25.76 (0.18) |
| 2030-39 | 25.89 (0.39)                                      | 25.98 (0.47) | 25.83 (0.35) | 26.13 (0.55) |
| 2040-49 | 26.04 (0.54)                                      | 26.23 (0.71) | 26.09 (0.61) | 26.43 (0.85) |
| 2050-59 | 25.93 (0.43)                                      | 26.38 (0.87) | 26.21 (0.73) | 26.83 (1.25) |
| 2060-69 | 26.02 (0.52)                                      | 26.56 (1.04) | 26.48 (1)    | 27.33 (1.75) |
| 2070-79 | 26.06 (0.56)                                      | 26.72 (1.21) | 26.74 (1.25) | 27.79 (2.21) |
| 2080-89 | 26 (0.49)                                         | 26.85 (1.34) | 27.02 (1.54) | 28.18 (2.6)  |
| 2090-99 | 25.95 (0.45)                                      | 26.8 (1.29)  | 27.25 (1.77) | 28.63 (3.05) |

**Table S8. Philippine-level projected mean annual population in millions by Shared Socioeconomic Pathways (SSPs) and decade based on the Inter-Sectoral Impact Model Intercomparison Project 2b**

| Decade  | Mean annual population in millions (difference from 2010-19) |              |               |               |              |
|---------|--------------------------------------------------------------|--------------|---------------|---------------|--------------|
|         | SSP 1                                                        | SSP 2        | SSP 3         | SSP 4         | SSP 5        |
| 2010-19 | 21.3 (0)                                                     | 21.3 (0)     | 21.3 (0)      | 21.6 (0)      | 21.2 (0)     |
| 2020-29 | 24.4 (14.91)                                                 | 24.7 (15.9)  | 25 (17.17)    | 25.9 (20.09)  | 24.3 (14.54) |
| 2030-39 | 27.2 (27.84)                                                 | 27.8 (30.73) | 28.8 (35)     | 30.6 (41.73)  | 26.9 (26.88) |
| 2040-49 | 29.3 (37.83)                                                 | 30.5 (43.44) | 32.5 (52.3)   | 35.3 (63.45)  | 28.9 (36.14) |
| 2050-59 | 30.7 (44.45)                                                 | 32.7 (53.69) | 36.1 (69.18)  | 40 (85.11)    | 30.1 (41.96) |
| 2060-69 | 31.4 (47.8)                                                  | 34.4 (61.39) | 39.5 (85.09)  | 44.4 (105.93) | 30.7 (44.54) |
| 2070-79 | 31.4 (47.86)                                                 | 35.4 (66.3)  | 42.6 (99.74)  | 48.7 (125.52) | 30.5 (43.99) |
| 2080-89 | 30.7 (44.52)                                                 | 35.9 (68.49) | 45.5 (113.24) | 52.6 (143.91) | 29.8 (40.29) |
| 2090-99 | 29.4 (38.16)                                                 | 35.8 (68.3)  | 48.1 (125.47) | 56.3 (160.8)  | 28.4 (33.82) |

**Table S9. Heterogeneity of multivariate meta-regression models for Philippine temperature–enteric infection associations in 2014-2017**

| Meta-predictors                    | Mortality due to enteric infections |        |       | Hospital admissions due to enteric infections |         |       |
|------------------------------------|-------------------------------------|--------|-------|-----------------------------------------------|---------|-------|
|                                    | <i>R</i> <sup>2</sup>               | Q test | AIC   | <i>R</i> <sup>2</sup>                         | Q test  | AIC   |
| Intercept-only                     | 50.6                                | 64.79  | 99.5  | 97.6                                          | 1500.71 | 70.09 |
| Popden                             | 31.6                                | 43.88  | 91.3  | 97.71                                         | 1310.66 | 68.18 |
| Popden + avtemp + rangetemp        | 35.82                               | 40.51  | 89.64 | 97.72                                         | 1143.90 | 69.81 |
| Popden + GRDP                      | 34.6                                | 42.83  | 91.9  | 96.5                                          | 800.89  | 60.98 |
| Popden + GRDP + water + sanitation | 28.9                                | 33.75  | 84.8  | 95.8                                          | 581.92  | 60.92 |

Popden=population density in 2015; avtemp=average temperature by region; rangetemp=temperature range by region (i.e., range is maximum value minus minimum value); GRDP=gross regional domestic product in 2017; water=percentage of households with access to safe water in 2017; sanitation=percentage of households with sanitary toilet in 2017

**Table S10. Relative risks of cumulative 2-metre temperature-enteric infections associations by high and low temperatures relative to minimum risk temperatures in 2014-2017**

| Region | 2-metre temperature (°C) |                      | Relative risks (95%CI) for mortality due to enteric infections |                      |          | Relative risks (95%CI) for hospital admissions due to enteric infections |                      |          |
|--------|--------------------------|----------------------|----------------------------------------------------------------|----------------------|----------|--------------------------------------------------------------------------|----------------------|----------|
|        | 95 <sup>th</sup> pctl    | 5 <sup>th</sup> pctl | High temperature                                               | Low temperature      | MRT (°C) | High temperature                                                         | Low temperature      | MRT (°C) |
| CAR    | 23.8                     | 18.8                 | 1.504 (0.928; 2.438)                                           | 1.003 (0.958; 1.050) | 19.2     | 1.186 (1.006; 1.398)                                                     | 1.016 (0.958; 1.077) | 19.9     |
| 1      | 28.4                     | 23.9                 | 1.186 (0.932; 1.509)                                           | 1.082 (0.909; 1.288) | 25.7     | 1.017 (0.994; 1.041)                                                     | 1.349 (1.135; 1.602) | 28.8     |
| 2      | 27.9                     | 20.5                 | 1.318 (0.902; 1.925)                                           | 1.087 (0.881; 1.341) | 23.0     | 1.623 (1.286; 2.049)                                                     | 1.079 (1.022; 1.139) | 19.5     |
| 3      | 29.2                     | 23.7                 | 1.135 (0.937; 1.376)                                           | 1.215 (0.957; 1.543) | 26.6     | 1.008 (0.986; 1.030)                                                     | 1.443 (1.192; 1.746) | 29.6     |
| NCR    | 29.5                     | 24.2                 | 1.839 (1.272; 2.658)                                           | 1.634 (1.141; 2.340) | 26.6     | 1.060 (0.825; 1.361)                                                     | 1.589 (0.999; 2.528) | 27.9     |
| 4A     | 28.5                     | 23.7                 | 1.445 (1.112; 1.879)                                           | 1.018 (0.940; 1.103) | 24.6     | 1.010 (0.965; 1.056)                                                     | 1.371 (1.197; 1.570) | 27.6     |
| 4B     | 27.7                     | 24.2                 | 1.213 (0.896; 1.642)                                           | 1.076 (0.887; 1.306) | 25.5     | 1.010 (0.993; 1.027)                                                     | 1.041 (0.861; 1.260) | 27.9     |
| 5      | 28.1                     | 24.1                 | 1.261 (0.956; 1.663)                                           | 1.078 (0.916; 1.268) | 25.5     | 1.504 (1.220; 1.855)                                                     | 1.062 (1.014; 1.112) | 23.6     |
| 6      | 27.9                     | 24.5                 | 1.349 (1.031; 1.764)                                           | 1.007 (0.948; 1.069) | 25.0     | 1.185 (0.994; 1.412)                                                     | 1.062 (1.018; 1.109) | 24.0     |
| 7      | 27.5                     | 24.6                 | 1.030 (0.926; 1.146)                                           | 1.234 (0.986; 1.544) | 26.6     | 1.011 (0.985; 1.037)                                                     | 1.493 (1.266; 1.761) | 27.8     |
| 8      | 27.8                     | 24.6                 | 1.239 (0.938; 1.637)                                           | 1.047 (0.912; 1.202) | 25.6     | 1.118 (0.928; 1.347)                                                     | 1.008 (0.968; 1.050) | 24.2     |
| 9      | 27.2                     | 24.9                 | 1.226 (0.926; 1.623)                                           | 1.023 (0.912; 1.147) | 25.5     | 1.482 (1.327; 1.654)                                                     | 1.073 (0.996; 1.155) | 25.6     |
| 10     | 25.7                     | 23.0                 | 1.106 (0.89; 1.375)                                            | 1.086 (0.911; 1.296) | 24.2     | 1.021 (0.966; 1.081)                                                     | 1.285 (1.149; 1.439) | 25.0     |
| 11     | 26.8                     | 24.2                 | 1.025 (0.906; 1.159)                                           | 1.198 (0.907; 1.583) | 26.0     | 1.136 (0.963; 1.339)                                                     | 1.030 (0.998; 1.064) | 23.9     |
| 12     | 27.1                     | 24.0                 | 1.184 (0.901; 1.555)                                           | 1.044 (0.883; 1.235) | 25.1     | 1.180 (1.039; 1.339)                                                     | 1.003 (0.971; 1.036) | 24.4     |
| 13     | 27.2                     | 24.2                 | 1.392 (0.940; 2.063)                                           | 1.003 (0.954; 1.055) | 24.5     | 1.134 (0.945; 1.361)                                                     | 1.060 (1.025; 1.096) | 23.9     |

|             |      |      |                         |                         |      |                         |                         |      |
|-------------|------|------|-------------------------|-------------------------|------|-------------------------|-------------------------|------|
| BARMM       | 25.9 | 23.5 | 1.095 (0.867;<br>1.383) | 1.155 (0.862;<br>1.547) | 24.8 | 1.570 (1.358;<br>1.816) | 1.009 (0.971;<br>1.049) | 23.8 |
| Philippines | 27.9 | 22.6 | 1.215 (1.059;<br>1.395) | 1.055 (0.955;<br>1.165) | 24.9 | 1.076 (0.956;<br>1.211) | 1.055 (0.953;<br>1.076) | 24.8 |

pctl=percentile; CI=confidence interval; MRT=minimum risk temperature; NCR=National Capital Region; CAR=Cordillera Autonomous Region; BARMM=Bangsamoro Autonomous Region of Muslim Mindanao

Note: Table S1 lists the full names of the regions.

**Table S11. Philippines-level temperature-attributable fractions of deaths due to enteric infections relative to 2010-2019 with no population change by Representative Concentration Pathway (RCP) scenarios, temperature range, and decade**

| RCPs | Decade  | Temperature-attributable fractions (95% empirical confidence intervals) |                     |                      |
|------|---------|-------------------------------------------------------------------------|---------------------|----------------------|
|      |         | High temperatures                                                       | Low temperatures    | Overall              |
| 2.6  | 2010-19 | 0 (0; 0)                                                                | 0 (0; 0)            | 0 (0; 0)             |
|      | 2020-29 | 1.8 (-0.32; 3.59)                                                       | -0.58 (-1.87; 0.37) | 1.22 (-1.93; 3.84)   |
|      | 2030-39 | 2.06 (-0.85; 5.46)                                                      | -0.86 (-2.57; 0.54) | 1.2 (-2.79; 5.89)    |
|      | 2040-49 | 3.18 (-0.85; 6.37)                                                      | -1.07 (-2.69; 0.72) | 2.11 (-3.3; 6.93)    |
|      | 2050-59 | 2.26 (-0.82; 5.96)                                                      | -0.87 (-2.61; 0.6)  | 1.39 (-3.04; 6.02)   |
|      | 2060-69 | 2.87 (-0.75; 6.87)                                                      | -1.15 (-2.95; 0.74) | 1.73 (-3.35; 7.18)   |
|      | 2070-79 | 3.11 (-0.93; 6.79)                                                      | -1.15 (-2.98; 0.76) | 1.96 (-3.55; 7.08)   |
|      | 2080-89 | 2.62 (-0.84; 6.43)                                                      | -0.99 (-2.66; 0.72) | 1.64 (-3.11; 6.68)   |
|      | 2090-99 | 2.34 (-1.05; 6.3)                                                       | -0.96 (-2.51; 0.65) | 1.38 (-3.1; 6.5)     |
| 4.5  | 2010-19 | 0 (0; 0)                                                                | 0 (0; 0)            | 0 (0; 0)             |
|      | 2020-29 | 1.62 (-0.49; 3.67)                                                      | -0.66 (-1.59; 0.34) | 0.96 (-1.88; 3.73)   |
|      | 2030-39 | 2.85 (-0.66; 7.04)                                                      | -0.97 (-2.48; 0.66) | 1.89 (-2.75; 6.96)   |
|      | 2040-49 | 4.57 (-1.12; 9.68)                                                      | -1.21 (-3.17; 0.88) | 3.36 (-3.93; 9.82)   |
|      | 2050-59 | 5.52 (-1.22; 13.26)                                                     | -1.51 (-3.69; 0.99) | 4.01 (-4.72; 13.31)  |
|      | 2060-69 | 7.11 (-1.36; 16.14)                                                     | -1.71 (-4.18; 1.09) | 5.4 (-5.18; 16.52)   |
|      | 2070-79 | 8.49 (-1.37; 19.82)                                                     | -1.76 (-4.32; 1.14) | 6.73 (-5.3; 20.23)   |
|      | 2080-89 | 9.72 (-1.32; 20.23)                                                     | -1.88 (-4.62; 1.22) | 7.84 (-5.51; 20.61)  |
|      | 2090-99 | 9.36 (-1.28; 20.74)                                                     | -1.78 (-4.44; 1.17) | 7.58 (-5.45; 20.98)  |
| 6.0  | 2010-19 | 0 (0; 0)                                                                | 0 (0; 0)            | 0 (0; 0)             |
|      | 2020-29 | 0.95 (-0.48; 2.77)                                                      | -0.55 (-1.43; 0.39) | 0.41 (-1.78; 2.69)   |
|      | 2030-39 | 2.08 (-0.37; 5.47)                                                      | -0.66 (-2.29; 0.54) | 1.42 (-2.12; 5.3)    |
|      | 2040-49 | 3.6 (-1.09; 9.58)                                                       | -1.18 (-3.05; 0.84) | 2.41 (-3.75; 9.48)   |
|      | 2050-59 | 4.42 (-1.11; 11.28)                                                     | -1.37 (-3.46; 0.96) | 3.06 (-4.17; 11.39)  |
|      | 2060-69 | 6.82 (-1.29; 15.1)                                                      | -1.49 (-4.05; 1.11) | 5.33 (-4.73; 15.51)  |
|      | 2070-79 | 8.69 (-1.81; 18.99)                                                     | -1.81 (-4.56; 1.27) | 6.88 (-5.92; 19.26)  |
|      | 2080-89 | 11.83 (-1.55; 23.19)                                                    | -1.89 (-4.81; 1.32) | 9.94 (-5.73; 23.48)  |
|      | 2090-99 | 13.98 (-1.47; 27.62)                                                    | -1.97 (-5.05; 1.38) | 12 (-6.1; 27.89)     |
| 8.5  | 2010-19 | 0 (0; 0)                                                                | 0 (0; 0)            | 0 (0; 0)             |
|      | 2020-29 | 1.05 (-0.56; 2.45)                                                      | -0.16 (-1.13; 0.39) | 0.89 (-1.26; 2.77)   |
|      | 2030-39 | 3.31 (-1.01; 7.78)                                                      | -0.97 (-2.66; 0.78) | 2.33 (-3.28; 8.35)   |
|      | 2040-49 | 5.62 (-1.39; 13.66)                                                     | -1.24 (-3.33; 0.96) | 4.38 (-4.35; 14)     |
|      | 2050-59 | 9.11 (-1.59; 20.16)                                                     | -1.48 (-3.89; 1.17) | 7.63 (-5.13; 20.55)  |
|      | 2060-69 | 14.06 (-1.47; 28.07)                                                    | -1.8 (-4.59; 1.29)  | 12.26 (-5.53; 28.52) |
|      | 2070-79 | 18.69 (-0.89; 35.82)                                                    | -1.88 (-4.8; 1.34)  | 16.8 (-5.38; 36.08)  |
|      | 2080-89 | 23.07 (0.14; 42.43)                                                     | -1.92 (-4.87; 1.35) | 21.15 (-4.57; 42.54) |
|      | 2090-99 | 27.55 (1.08; 48.12)                                                     | -1.97 (-4.97; 1.39) | 25.59 (-3.53; 48.25) |

**Table S12. Philippines-level temperature-attributable fractions of hospital admissions due to enteric infections relative to 2010-2019 with no population change by Representative Concentration Pathway (RCP) scenarios, temperature range, and decade**

| RCPs | Decade  | Temperature-attributable fractions (95% empirical confidence intervals) |                      |                      |
|------|---------|-------------------------------------------------------------------------|----------------------|----------------------|
|      |         | High temperatures                                                       | Low temperatures     | Overall              |
| 2.6  | 2010-19 | 0 (0; 0)                                                                | 0 (0; 0)             | 0 (0; 0)             |
|      | 2020-29 | 0.78 (-0.04; 1.65)                                                      | -0.86 (-1.67; -0.04) | -0.08 (-1.44; 1.12)  |
|      | 2030-39 | 1.21 (0.11; 2.56)                                                       | -1.15 (-2.36; -0.03) | 0.06 (-1.95; 1.79)   |
|      | 2040-49 | 1.57 (0.11; 2.89)                                                       | -1.58 (-2.51; -0.52) | -0.01 (-2.25; 2.14)  |
|      | 2050-59 | 1.32 (0.14; 2.83)                                                       | -1.24 (-2.56; -0.2)  | 0.08 (-1.94; 1.89)   |
|      | 2060-69 | 1.5 (0.16; 3.24)                                                        | -1.61 (-2.84; -0.48) | -0.1 (-2.34; 2.24)   |
|      | 2070-79 | 1.65 (0.17; 3.17)                                                       | -1.68 (-2.9; -0.57)  | -0.03 (-2.36; 2.16)  |
|      | 2080-89 | 1.48 (0.11; 3.15)                                                       | -1.43 (-2.58; -0.45) | 0.05 (-2.08; 2.28)   |
|      | 2090-99 | 1.35 (0.2; 2.91)                                                        | -1.33 (-2.48; -0.42) | 0.02 (-2.07; 1.99)   |
| 4.5  | 2010-19 | 0 (0; 0)                                                                | 0 (0; 0)             | 0 (0; 0)             |
|      | 2020-29 | 0.7 (-0.05; 1.37)                                                       | -0.92 (-1.52; -0.34) | -0.22 (-1.44; 0.93)  |
|      | 2030-39 | 1.42 (0.07; 3.32)                                                       | -1.37 (-2.57; -0.45) | 0.05 (-1.97; 2.21)   |
|      | 2040-49 | 2.2 (0.03; 4.47)                                                        | -1.91 (-3.21; -0.59) | 0.29 (-2.84; 3.41)   |
|      | 2050-59 | 2.77 (0.2; 6.19)                                                        | -2.28 (-3.83; -0.76) | 0.49 (-3.27; 4.75)   |
|      | 2060-69 | 3.28 (0.04; 7.45)                                                       | -2.68 (-4.39; -0.85) | 0.6 (-4.05; 6.1)     |
|      | 2070-79 | 3.94 (-0.05; 9.24)                                                      | -2.86 (-5.07; -0.88) | 1.08 (-4.51; 7.49)   |
|      | 2080-89 | 4.35 (-0.17; 9.37)                                                      | -3.14 (-5.07; -0.94) | 1.21 (-5; 7.78)      |
|      | 2090-99 | 4.26 (-0.07; 9.64)                                                      | -2.96 (-5.01; -0.88) | 1.31 (-4.72; 8.13)   |
| 6.0  | 2010-19 | 0 (0; 0)                                                                | 0 (0; 0)             | 0 (0; 0)             |
|      | 2020-29 | 0.6 (0.03; 1.32)                                                        | -0.74 (-1.32; -0.26) | -0.14 (-1.06; 0.79)  |
|      | 2030-39 | 0.98 (0.03; 2.65)                                                       | -1.03 (-2.44; -0.17) | -0.05 (-1.71; 1.62)  |
|      | 2040-49 | 1.89 (0.09; 4.48)                                                       | -1.74 (-3.28; -0.55) | 0.14 (-2.56; 3.15)   |
|      | 2050-59 | 2.24 (0.13; 5.32)                                                       | -2.04 (-3.52; -0.63) | 0.2 (-2.9; 3.95)     |
|      | 2060-69 | 3.15 (-0.02; 7.05)                                                      | -2.48 (-4.31; -0.68) | 0.67 (-3.98; 5.64)   |
|      | 2070-79 | 4.09 (0; 8.88)                                                          | -3 (-4.96; -0.92)    | 1.08 (-4.67; 7.35)   |
|      | 2080-89 | 5.08 (-0.43; 11.1)                                                      | -3.31 (-5.53; -0.92) | 1.77 (-5.57; 9.28)   |
|      | 2090-99 | 5.81 (-0.82; 12.9)                                                      | -3.59 (-6.04; -0.96) | 2.21 (-6.5; 11.22)   |
| 8.5  | 2010-19 | 0 (0; 0)                                                                | 0 (0; 0)             | 0 (0; 0)             |
|      | 2020-29 | 0.66 (0.02; 1.23)                                                       | -0.39 (-1.08; 0.09)  | 0.27 (-0.77; 1.15)   |
|      | 2030-39 | 1.77 (0.2; 3.6)                                                         | -1.52 (-2.74; -0.46) | 0.25 (-2.16; 2.77)   |
|      | 2040-49 | 2.85 (0.13; 6.47)                                                       | -2.05 (-3.77; -0.62) | 0.8 (-3.03; 5.28)    |
|      | 2050-59 | 4.35 (0; 9.6)                                                           | -2.67 (-4.72; -0.77) | 1.68 (-4.3; 8.22)    |
|      | 2060-69 | 5.95 (-0.78; 13.37)                                                     | -3.42 (-5.83; -0.86) | 2.52 (-6.07; 11.71)  |
|      | 2070-79 | 7.43 (-2.08; 17.14)                                                     | -3.75 (-6.38; -0.91) | 3.68 (-8.01; 15.41)  |
|      | 2080-89 | 8.35 (-3.93; 20.68)                                                     | -3.96 (-6.75; -0.88) | 4.39 (-10.2; 19.01)  |
|      | 2090-99 | 9.43 (-6.09; 23.66)                                                     | -4.17 (-7.19; -0.89) | 5.27 (-12.78; 21.86) |



**Table S13. Regional temperature-attributable fractions of deaths and hospital admissions due to enteric infections in 2090-2099 relative to 2010-2019 by representative concentration pathways and no population change.**

| Region | RCP | Mortality due to enteric infections % change (95%eCI) |                    |                    | Hospital admissions due to enteric infections % change (95%eCI) |                     |                     |
|--------|-----|-------------------------------------------------------|--------------------|--------------------|-----------------------------------------------------------------|---------------------|---------------------|
|        |     | High temperature                                      | Low temperature    | Overall            | High temperature                                                | Low temperature     | Overall             |
| CAR    | 2.6 | 4.1 (-0.3; 7.4)                                       | -0.1 (-0.5; 0.3)   | 4 (-0.5; 7.5)      | 2.1 (0.2; 4.2)                                                  | -0.1 (-0.5; 0.2)    | 2 (0.1; 4.1)        |
|        | 4.5 | 11.1 (0.6; 16.9)                                      | -0.1 (-0.6; 0.4)   | 11 (0.3; 17.1)     | 6.3 (0.9; 11.6)                                                 | -0.2 (-0.6; 0.3)    | 6.1 (0.9; 11.3)     |
|        | 6.0 | 14.9 (1; 22.2)                                        | -0.1 (-0.6; 0.5)   | 14.8 (0.6; 22.2)   | 8.5 (1.3; 15.5)                                                 | -0.2 (-0.7; 0.3)    | 8.4 (1.2; 15.2)     |
|        | 8.5 | 25.4 (3.2; 34.9)                                      | -0.1 (-0.7; 0.5)   | 25.3 (3; 34.8)     | 15.3 (2.6; 26.3)                                                | -0.2 (-0.7; 0.4)    | 15.1 (2.6; 26)      |
| 1      | 2.6 | 2 (-1.3; 5)                                           | -0.5 (-1.7; 0.7)   | 1.5 (-2.7; 5.4)    | -0.1 (-0.2; 0)                                                  | -2.5 (-4.2; -1)     | -2.6 (-4.3; -1)     |
|        | 4.5 | 7.1 (-2.8; 15.6)                                      | -0.8 (-2.3; 1)     | 6.3 (-4.7; 16)     | -0.6 (-1.6; 0.3)                                                | -5.7 (-9.9; -1.9)   | -6.3 (-11.3; -1.8)  |
|        | 6.0 | 10.1 (-3.4; 21.1)                                     | -0.8 (-2.6; 1.1)   | 9.3 (-5.4; 21.3)   | -1 (-2.9; 0.4)                                                  | -7.3 (-12.7; -2.3)  | -8.2 (-15.5; -2)    |
|        | 8.5 | 19.8 (-3.1; 36.5)                                     | -0.9 (-2.8; 1.3)   | 19 (-5.4; 36.7)    | -3.6 (-11.7; 1.7)                                               | -9.7 (-16.6; -2.6)  | -13.3 (-27.8; -1.1) |
| 2      | 2.6 | 2.1 (-1; 4.8)                                         | -0.4 (-1.4; 0.6)   | 1.8 (-2; 5)        | 1.8 (0.7; 3.1)                                                  | 0.1 (-0.1; 0.3)     | 1.9 (0.7; 3.2)      |
|        | 4.5 | 6.4 (-1.9; 12.3)                                      | -0.6 (-2; 0.9)     | 5.8 (-3.5; 12.7)   | 4.2 (1.2; 7.3)                                                  | 0.1 (0; 0.2)        | 4.3 (1.2; 7.4)      |
|        | 6.0 | 8.8 (-2.4; 16.2)                                      | -0.6 (-2.3; 1)     | 8.2 (-4.2; 16.6)   | 5.5 (1.3; 9.6)                                                  | 0.1 (0; 0.2)        | 5.6 (1.5; 9.7)      |
|        | 8.5 | 16 (-3.3; 27.2)                                       | -0.7 (-2.5; 1.3)   | 15.3 (-5.2; 27.5)  | 8.8 (1.5; 15.5)                                                 | 0.1 (0; 0.2)        | 8.9 (1.6; 15.6)     |
| 3      | 2.6 | 0.7 (-0.8; 2.5)                                       | -1.2 (-3.3; 0.7)   | -0.5 (-3.7; 3.1)   | 0 (-0.2; 0.1)                                                   | -2.4 (-4.4; -0.8)   | -2.5 (-4.4; -0.7)   |
|        | 4.5 | 3.5 (-2.4; 9.5)                                       | -2.2 (-5.5; 1.5)   | 1.3 (-7.2; 10.2)   | -0.1 (-0.7; 0.3)                                                | -6 (-9.6; -2.7)     | -6.2 (-10; -2.6)    |
|        | 6.0 | 5.4 (-3; 14)                                          | -2.3 (-6.3; 1.8)   | 3.1 (-8.4; 14.8)   | -0.2 (-1.2; 0.6)                                                | -7.5 (-12.3; -3)    | -7.7 (-13.4; -2.7)  |
|        | 8.5 | 12.7 (-4.7; 28.4)                                     | -2.5 (-6.8; 2.1)   | 10.2 (-10.3; 28.7) | -0.9 (-5.1; 2.2)                                                | -10.3 (-17.4; -3.1) | -11.2 (-22.2; -1.3) |
| NCR    | 2.6 | 2.4 (-3.4; 6.5)                                       | -2.4 (-5.8; -0.2)  | -0.1 (-4.6; 5.4)   | 0.2 (-1.7; 1.8)                                                 | -3 (-7.6; 0.5)      | -2.8 (-8.1; 2)      |
|        | 4.5 | 12.3 (3.8; 22.1)                                      | -5.3 (-10; -0.6)   | 7 (-4.5; 20.1)     | 1.6 (-5.4; 7.1)                                                 | -7.4 (-14.8; 2.4)   | -5.8 (-18.7; 7.4)   |
|        | 6.0 | 18.4 (5.4; 30.4)                                      | -5.5 (-11.1; -0.1) | 12.9 (-2; 28.2)    | 2.8 (-9; 11.8)                                                  | -8.4 (-17.7; 3.3)   | -5.5 (-24.7; 12.2)  |
|        | 8.5 | 37.8 (18.6; 55.3)                                     | -6.2 (-11.5; -0.3) | 31.6 (9.6; 51.8)   | 7.9 (-21.3; 28.5)                                               | -9.8 (-21; 4.8)     | -1.9 (-39.2; 28.6)  |
| 4A     | 2.6 | 2.6 (-2.5; 6.6)                                       | -0.1 (-0.5; 0.2)   | 2.5 (-2.5; 6.8)    | 0.1 (-0.5; 0.6)                                                 | -1.9 (-4.3; 0.3)    | -1.9 (-4.3; 0.5)    |
|        | 4.5 | 10.4 (3.1; 18.3)                                      | -0.2 (-0.9; 0.5)   | 10.2 (2.3; 18.3)   | 0.6 (-1.3; 2.7)                                                 | -4.9 (-7.7; -2.1)   | -4.3 (-8.6; -0.1)   |
|        | 6.0 | 15.5 (5.3; 24.5)                                      | -0.2 (-0.9; 0.5)   | 15.2 (4.7; 24.5)   | 1.1 (-2.2; 4.8)                                                 | -5.8 (-9.3; -2.2)   | -4.6 (-10.9; 1.6)   |
|        | 8.5 | 27.9 (13.3; 41.4)                                     | -0.2 (-1; 0.5)     | 27.7 (12.8; 41.4)  | 3.4 (-5; 12.5)                                                  | -6.4 (-10.5; -2.1)  | -3 (-14.8; 9.3)     |
| 4B     | 2.6 | 2.9 (-2.4; 7.8)                                       | -0.4 (-1.7; 0.9)   | 2.5 (-3.9; 8.5)    | -0.1 (-0.4; 0.1)                                                | -0.7 (-3.1; 1.8)    | -0.8 (-3.4; 1.8)    |
|        | 4.5 | 10.2 (-5.7; 23.6)                                     | -0.7 (-2.6; 1.5)   | 9.5 (-7.9; 24.2)   | -0.9 (-3.1; 0.5)                                                | -2.4 (-8.7; 3.6)    | -3.3 (-11.6; 4)     |
|        | 6.0 | 14.6 (-6.6; 30.7)                                     | -0.7 (-2.9; 1.7)   | 13.9 (-9.2; 31.5)  | -1.7 (-6.3; 1.1)                                                | -3.3 (-10.7; 4.6)   | -5 (-16.6; 5.4)     |
|        | 8.5 | 28.6 (-7.8; 51.8)                                     | -0.7 (-2.6; 1.5)   | 27.9 (-9.8; 52.3)  | -7.1 (-25.9; 4.1)                                               | -4.7 (-13.8; 5.3)   | -11.8 (-38.8; 8.9)  |
| 5      | 2.6 | 2.9 (-0.9; 8.3)                                       | -0.4 (-1.4; 0.6)   | 2.5 (-1.9; 8.4)    | 2.6 (0.7; 5.3)                                                  | 0.1 (0; 0.2)        | 2.7 (0.7; 5.4)      |
|        | 4.5 | 10.4 (-1.1; 22.3)                                     | -0.7 (-2.1; 1)     | 9.7 (-2.8; 22.3)   | 7 (2.1; 13.2)                                                   | 0.1 (0; 0.3)        | 7.2 (2.3; 13.3)     |
|        | 6.0 | 15.5 (-1; 29.1)                                       | -0.8 (-2.4; 1.1)   | 14.8 (-3.1; 29.1)  | 9.6 (2.2; 17)                                                   | 0.1 (0; 0.2)        | 9.7 (2.3; 17.1)     |
|        | 8.5 | 27.6 (1.2; 46.5)                                      | -0.7 (-2.2; 1)     | 27 (-0.3; 46.5)    | 14.3 (1.5; 26.8)                                                | 0.1 (0; 0.3)        | 14.4 (1.6; 26.9)    |
| 6      | 2.6 | 3.8 (-1.2; 8.7)                                       | -0.1 (-0.6; 0.4)   | 3.7 (-1.5; 8.9)    | 0.9 (-1.3; 2.7)                                                 | 0.1 (0; 0.3)        | 1 (-1.3; 2.9)       |
|        | 4.5 | 13.4 (2.4; 25.6)                                      | -0.2 (-1; 0.7)     | 13.2 (1.7; 25.8)   | 0.3 (-7.4; 4.9)                                                 | 0.2 (0; 0.3)        | 0.5 (-7.3; 5.1)     |
|        | 6.0 | 19.8 (4.7; 32.5)                                      | -0.2 (-1; 0.7)     | 19.6 (4; 32.6)     | -0.8 (-11.9; 6.1)                                               | 0.2 (0; 0.4)        | -0.6 (-11.6; 6.4)   |
|        | 8.5 | 36 (14.7; 54.2)                                       | -0.1 (-0.9; 0.6)   | 35.8 (14.1; 54.2)  | -7.4 (-33.3; 7.3)                                               | 0.1 (0; 0.3)        | -7.3 (-33.2; 7.4)   |
| 7      | 2.6 | 0.7 (-1.8; 3.5)                                       | -2.4 (-5.4; 0.8)   | -1.7 (-6.9; 3.9)   | -0.1 (-0.6; 0.3)                                                | -4.6 (-7.5; -2.3)   | -4.7 (-7.8; -2.2)   |

|             |     |                    |                   |                    |                    |                     |                     |
|-------------|-----|--------------------|-------------------|--------------------|--------------------|---------------------|---------------------|
| 8           | 4.5 | 3.7 (-6.1; 15.5)   | -4.3 (-9.8; 2.1)  | -0.6 (-15; 16.2)   | -0.6 (-4.2; 2)     | -10.1 (-16.6; -5.2) | -10.7 (-20.3; -4.1) |
|             | 6.0 | 6.3 (-9.2; 21.7)   | -5.1 (-11.7; 2.6) | 1.2 (-20; 22.5)    | -1.1 (-7.5; 3.5)   | -12.7 (-19.2; -6)   | -13.7 (-25.7; -3.2) |
|             | 8.5 | 15.8 (-18.3; 44.5) | -4.7 (-11.8; 2.9) | 11.1 (-28.8; 45.5) | -3.5 (-26.5; 12)   | -13.6 (-21.9; -4.9) | -17.1 (-47; 5.8)    |
|             | 2.6 | 3.3 (-1.3; 8.3)    | -0.5 (-1.8; 0.9)  | 2.8 (-2.8; 8.4)    | 1.4 (-1.1; 3.9)    | 0 (-0.1; 0.1)       | 1.4 (-1.1; 3.9)     |
| 9           | 4.5 | 11.6 (-2.1; 25.6)  | -0.7 (-2.5; 1.4)  | 10.9 (-4.3; 26)    | 4.2 (-3.2; 12.5)   | 0 (-0.1; 0.2)       | 4.2 (-3.2; 12.5)    |
|             | 6.0 | 17.2 (-2.6; 33.1)  | -0.8 (-2.9; 1.5)  | 16.3 (-5; 33.4)    | 6 (-5.2; 16.6)     | 0 (-0.1; 0.2)       | 6 (-5.1; 16.6)      |
|             | 8.5 | 31.5 (0.1; 52.9)   | -0.7 (-2.5; 1.4)  | 30.8 (-1.7; 52.9)  | 10.4 (-11.1; 29.2) | 0 (-0.1; 0.2)       | 10.4 (-11.1; 29.2)  |
|             | 2.6 | 4.3 (-2; 11.3)     | -0.3 (-1.6; 1.1)  | 4 (-3.3; 12)       | 7.6 (3.9; 13.5)    | -0.8 (-1.7; 0)      | 6.8 (2.7; 12.8)     |
| 10          | 4.5 | 16.4 (-2.8; 35.4)  | -0.4 (-2.2; 1.6)  | 16 (-4.5; 36)      | 27.7 (14.8; 45.4)  | -1.1 (-2.4; 0.1)    | 26.6 (13.4; 44.5)   |
|             | 6.0 | 23.3 (-2.1; 44)    | -0.5 (-2.9; 1.9)  | 22.8 (-4.5; 44.8)  | 38.5 (22.3; 56.2)  | -1.4 (-3.1; 0.1)    | 37.1 (20.4; 55.2)   |
|             | 8.5 | 44.5 (5.7; 69.7)   | -0.4 (-2.2; 1.5)  | 44.1 (4.2; 70.1)   | 64.7 (46.9; 82.5)  | -1.1 (-2.5; 0.1)    | 63.6 (45.8; 81.6)   |
|             | 2.6 | 1.8 (-2.9; 6.8)    | -0.9 (-2.9; 1.4)  | 0.9 (-5.5; 7.6)    | 0.4 (-0.6; 1.8)    | -3 (-5; -1.3)       | -2.5 (-5.4; -0.1)   |
| 11          | 4.5 | 8.5 (-8.2; 26.1)   | -1.3 (-4.5; 2.3)  | 7.3 (-12.1; 27.2)  | 3.2 (-2.4; 11.7)   | -5 (-8.5; -1.6)     | -1.8 (-10; 8.9)     |
|             | 6.0 | 13.5 (-11.6; 34.3) | -1.5 (-5.2; 2.5)  | 12 (-16.4; 35.5)   | 5.7 (-3.7; 17.9)   | -5.7 (-9.6; -1.8)   | 0 (-12.3; 14.7)     |
|             | 8.5 | 28.3 (-17.8; 59.8) | -1.2 (-4.5; 2.3)  | 27.1 (-21.3; 61.1) | 15.6 (-6.5; 39.6)  | -5.1 (-9; -1.4)     | 10.5 (-14; 37)      |
|             | 2.6 | 0.5 (-2; 3.4)      | -2 (-6.4; 2.4)    | -1.5 (-8.1; 5)     | 1 (-1.4; 3.2)      | 0.1 (0; 0.2)        | 1.1 (-1.3; 3.3)     |
| 12          | 4.5 | 3.9 (-9.1; 17.4)   | -3.6 (-10.9; 4.9) | 0.3 (-19.5; 20.9)  | 1 (-8.2; 7.9)      | 0.1 (0; 0.4)        | 1.1 (-8; 8)         |
|             | 6.0 | 6.6 (-13.2; 25.4)  | -4.2 (-12.6; 5.5) | 2.4 (-24.9; 29.1)  | 0.4 (-13.3; 10.2)  | 0.2 (0; 0.5)        | 0.6 (-13.1; 10.2)   |
|             | 8.5 | 18.2 (-28.8; 52.2) | -3.9 (-12.4; 5.7) | 14.3 (-39.1; 55.3) | -4.2 (-37.2; 16.8) | 0.1 (0; 0.5)        | -4 (-37; 16.9)      |
|             | 2.6 | 1.7 (-2.5; 6.1)    | -0.5 (-2.9; 2)    | 1.2 (-5.2; 7.6)    | 2 (-0.1; 4.7)      | 0 (-0.4; 0.3)       | 1.9 (-0.3; 4.8)     |
| 13          | 4.5 | 8 (-6.8; 23.1)     | -0.8 (-4.4; 3.1)  | 7.2 (-10.6; 25.3)  | 7.7 (1.5; 16)      | -0.1 (-0.5; 0.4)    | 7.7 (1.2; 16)       |
|             | 6.0 | 12.2 (-8.4; 31.1)  | -0.9 (-5; 3.5)    | 11.3 (-12.7; 33.5) | 11.3 (2.7; 21.5)   | -0.1 (-0.7; 0.5)    | 11.3 (2.3; 21.6)    |
|             | 8.5 | 29.1 (-8.1; 58.1)  | -0.8 (-4.4; 3.2)  | 28.4 (-12.1; 59.8) | 24.7 (8.2; 44.5)   | -0.1 (-0.5; 0.4)    | 24.6 (8.2; 44.4)    |
|             | 2.6 | 5.1 (-0.7; 11.6)   | -0.1 (-0.6; 0.4)  | 5.1 (-1.1; 11.6)   | -0.5 (-4.8; 1.9)   | 0.2 (0.1; 0.5)      | -0.3 (-4.6; 2.1)    |
| BARMM       | 4.5 | 16.3 (0.5; 29.5)   | -0.1 (-0.7; 0.5)  | 16.2 (0.2; 29.6)   | -5.8 (-20.9; 1.9)  | 0.3 (0.1; 0.7)      | -5.5 (-20.6; 2.2)   |
|             | 6.0 | 23.7 (2.3; 37)     | -0.1 (-0.9; 0.6)  | 23.6 (1.7; 37.1)   | -10.6 (-31.2; 1.5) | 0.3 (0.1; 0.6)      | -10.3 (-30.8; 1.8)  |
|             | 8.5 | 41 (10.5; 58.6)    | -0.1 (-0.7; 0.5)  | 40.9 (10.2; 58.7)  | -31 (-88.2; -2.4)  | 0.3 (0.1; 0.8)      | -30.7 (-87.9; -2.2) |
|             | 2.6 | 1.6 (-3.4; 7)      | -1.9 (-6.3; 3.1)  | -0.3 (-9.4; 9)     | 7.5 (4; 13.7)      | -0.2 (-0.6; 0.3)    | 7.3 (3.6; 13.7)     |
| Philippines | 4.5 | 8.8 (-11.4; 28.8)  | -2.9 (-10; 5.4)   | 5.9 (-20.5; 32)    | 26 (14.9; 41.9)    | -0.2 (-0.8; 0.4)    | 25.9 (14.7; 41.7)   |
|             | 6.0 | 13.7 (-15.8; 39)   | -3.4 (-11.7; 6.1) | 10.3 (-26.5; 42.2) | 35.4 (21.8; 51.9)  | -0.3 (-1.2; 0.5)    | 35.1 (21.4; 51.7)   |
|             | 8.5 | 31.2 (-27.1; 67.1) | -3 (-10.9; 5.9)   | 28.2 (-37.9; 69.9) | 58.9 (41.1; 78.2)  | -0.2 (-0.9; 0.4)    | 58.7 (41.1; 77.9)   |
|             | 2.6 | 2.3 (-1.1; 6.3)    | -1 (-2.5; 0.7)    | 1.4 (-3.1; 6.5)    | 1.4 (0.2; 2.9)     | -1.3 (-2.5; -0.4)   | 0 (-2.1; 2)         |
| Philippines | 4.5 | 9.4 (-1.3; 20.7)   | -1.8 (-4.4; 1.2)  | 7.6 (-5.4; 21)     | 4.3 (-0.1; 9.6)    | -3 (-5; -0.9)       | 1.3 (-4.7; 8.1)     |
|             | 6.0 | 14 (-1.5; 27.6)    | -2 (-5.1; 1.4)    | 12 (-6.1; 27.9)    | 5.8 (-0.8; 12.9)   | -3.6 (-6; -1)       | 2.2 (-6.5; 11.2)    |
|             | 8.5 | 27.6 (1.1; 48.1)   | -2 (-5; 1.4)      | 25.6 (-3.5; 48.2)  | 9.4 (-6.1; 23.7)   | -4.2 (-7.2; -0.9)   | 5.3 (-12.8; 21.9)   |

CAR=Cordillera Administrative Region; NCR=National Capital Region; BARMM=Bangsamoro Autonomous Region in Muslim Mindanao; eCI=empirical confidence interval; RCP=representative concentration pathway

**Table S14. Regional temperature-attributable numbers of deaths and hospital admissions due to enteric infections in 2090-2099 relative to 2010-2019 by representative concentration pathways and no population change.**

| Region | RCP | Number of deaths due to enteric infections (95%eCI) |                  |                  | Number of hospital admissions due to enteric infections (95%eCI) |                         |                         |
|--------|-----|-----------------------------------------------------|------------------|------------------|------------------------------------------------------------------|-------------------------|-------------------------|
|        |     | High temperature                                    | Low temperature  | Overall          | High temperature                                                 | Low temperature         | Overall                 |
| CAR    | 2.6 | 22 (-1; 40)                                         | 0 (-3; 2)        | 22 (-3; 41)      | 2893 (322; 5895)                                                 | -151 (-655; 262)        | 2742 (161; 5707)        |
|        | 4.5 | 61 (3; 93)                                          | -1 (-3; 2)       | 60 (1; 93)       | 8732 (1312; 16123)                                               | -236 (-885; 414)        | 8496 (1189; 15780)      |
|        | 6.0 | 82 (6; 121)                                         | -1 (-4; 3)       | 81 (3; 122)      | 11920 (1871; 21563)                                              | -258 (-1010; 451)       | 11661 (1726; 21201)     |
|        | 8.5 | 139 (18; 191)                                       | -1 (-4; 3)       | 139 (17; 191)    | 21319 (3682; 36700)                                              | -257 (-1001; 509)       | 21062 (3623; 36334)     |
| 1      | 2.6 | 41 (-27; 106)                                       | -10 (-36; 14)    | 31 (-57; 114)    | -203 (-774; 92)                                                  | -8837 (-14954; -3413)   | -9040 (-15272; -3462)   |
|        | 4.5 | 149 (-59; 328)                                      | -16 (-49; 21)    | 133 (-98; 336)   | -1961 (-5759; 920)                                               | -20169 (-34867; -6882)  | -22131 (-39987; -6371)  |
|        | 6.0 | 212 (-72; 442)                                      | -17 (-54; 23)    | 196 (-114; 448)  | -3380 (-10423; 1585)                                             | -25711 (-44811; -8113)  | -29091 (-54686; -7083)  |
|        | 8.5 | 416 (-64; 767)                                      | -18 (-59; 27)    | 398 (-114; 771)  | -12761 (-41503; 6026)                                            | -34394 (-58681; -9162)  | -47155 (-98192; -3976)  |
| 2      | 2.6 | 33 (-15; 74)                                        | -6 (-22; 9)      | 27 (-30; 77)     | 3795 (1483; 6450)                                                | 132 (-121; 563)         | 3927 (1497; 6717)       |
|        | 4.5 | 99 (-30; 191)                                       | -9 (-31; 15)     | 90 (-55; 197)    | 8842 (2484; 15336)                                               | 192 (23; 499)           | 9034 (2575; 15496)      |
|        | 6.0 | 137 (-38; 251)                                      | -10 (-36; 16)    | 127 (-65; 257)   | 11509 (2815; 20242)                                              | 224 (36; 488)           | 11733 (3054; 20453)     |
|        | 8.5 | 248 (-51; 421)                                      | -11 (-39; 21)    | 237 (-81; 427)   | 18470 (3152; 32570)                                              | 192 (22; 478)           | 18662 (3407; 32713)     |
| 3      | 2.6 | 24 (-28; 91)                                        | -42 (-119; 26)   | -18 (-135; 112)  | -61 (-635; 248)                                                  | -9877 (-17826; -3058)   | -9938 (-17878; -2941)   |
|        | 4.5 | 127 (-87; 345)                                      | -78 (-201; 54)   | 48 (-262; 370)   | -556 (-2831; 1302)                                               | -24381 (-38694; -10828) | -24937 (-40393; -10442) |
|        | 6.0 | 196 (-110; 510)                                     | -84 (-228; 66)   | 111 (-306; 538)  | -1004 (-4982; 2391)                                              | -30274 (-49864; -12121) | -31278 (-54104; -10908) |
|        | 8.5 | 463 (-173; 1033)                                    | -93 (-249; 75)   | 370 (-374; 1043) | -3768 (-20742; 9063)                                             | -41585 (-70294; -12583) | -45353 (-89614; -5379)  |
| NCR    | 2.6 | 122 (-176; 337)                                     | -126 (-298; -8)  | -3 (-237; 280)   | 533 (-4527; 4739)                                                | -7841 (-19952; 1193)    | -7308 (-21337; 5143)    |
|        | 4.5 | 637 (195; 1142)                                     | -273 (-514; -31) | 364 (-230; 1040) | 4243 (-14160; 18736)                                             | -19412 (-38771; 6332)   | -15169 (-49072; 19521)  |
|        | 6.0 | 950 (279; 1571)                                     | -285 (-573; -8)  | 665 (-104; 1455) | 7392 (-23698; 30899)                                             | -21898 (-46433; 8727)   | -14505 (-64658; 32068)  |
|        | 8.5 | 1950 (959; 2855)                                    | -318 (-594; -15) | 1631 (497; 2672) | 20762 (-55968; 74638)                                            | -25697 (-54990; 12611)  | -4935 (-102921; 74955)  |
| 4A     | 2.6 | 134 (-130; 348)                                     | -5 (-27; 12)     | 130 (-130; 356)  | 289 (-2676; 2811)                                                | -9811 (-21529; 1490)    | -9522 (-21942; 2464)    |
|        | 4.5 | 544 (162; 956)                                      | -12 (-49; 27)    | 532 (122; 956)   | 2953 (-6370; 13567)                                              | -24677 (-38757; -10755) | -21724 (-43390; -330)   |
|        | 6.0 | 808 (277; 1282)                                     | -11 (-49; 26)    | 797 (247; 1283)  | 5770 (-11106; 24053)                                             | -29026 (-46908; -11077) | -23257 (-55162; 8266)   |
|        | 8.5 | 1459 (697; 2167)                                    | -11 (-50; 27)    | 1448 (670; 2163) | 17240 (-25287; 63087)                                            | -32351 (-53238; -10588) | -15110 (-74626; 46835)  |
| 4B     | 2.6 | 37 (-30; 98)                                        | -5 (-21; 12)     | 32 (-49; 106)    | -93 (-514; 89)                                                   | -789 (-3649; 2094)      | -881 (-3919; 2121)      |

|    |     |                  |                  |                   |                         |                         |                         |
|----|-----|------------------|------------------|-------------------|-------------------------|-------------------------|-------------------------|
|    | 4.5 | 128 (-72; 296)   | -9 (-33; 19)     | 119 (-99; 304)    | -1022 (-3592; 601)      | -2807 (-10052; 4228)    | -3829 (-13415; 4614)    |
|    | 6.0 | 183 (-82; 385)   | -9 (-37; 21)     | 174 (-115; 396)   | -2018 (-7289; 1271)     | -3819 (-12419; 5297)    | -5837 (-19226; 6211)    |
|    | 8.5 | 359 (-98; 651)   | -8 (-33; 19)     | 351 (-124; 656)   | -8209 (-29965; 4698)    | -5455 (-16008; 6168)    | -13664 (-44971; 10276)  |
| 5  | 2.6 | 92 (-29; 266)    | -12 (-45; 18)    | 80 (-62; 271)     | 5635 (1475; 11248)      | 158 (-26; 516)          | 5793 (1540; 11490)      |
|    | 4.5 | 334 (-35; 714)   | -22 (-68; 30)    | 312 (-91; 716)    | 15023 (4474; 28144)     | 233 (17; 596)           | 15257 (4874; 28370)     |
|    | 6.0 | 498 (-33; 933)   | -24 (-78; 34)    | 473 (-98; 934)    | 20438 (4656; 36332)     | 253 (20; 530)           | 20691 (5008; 36562)     |
|    | 8.5 | 886 (37; 1492)   | -21 (-69; 32)    | 865 (-9; 1490)    | 30460 (3191; 57203)     | 210 (12; 654)           | 30670 (3449; 57360)     |
| 6  | 2.6 | 195 (-62; 441)   | -5 (-29; 19)     | 190 (-78; 454)    | 2813 (-4201; 8523)      | 266 (-121; 924)         | 3079 (-4074; 9130)      |
|    | 4.5 | 678 (123; 1301)  | -9 (-50; 35)     | 669 (86; 1308)    | 1099 (-23422; 15538)    | 533 (118; 995)          | 1632 (-22953; 16207)    |
|    | 6.0 | 1006 (237; 1651) | -9 (-53; 35)     | 997 (204; 1657)   | -2509 (-37454; 19391)   | 575 (126; 1223)         | -1934 (-36659; 20113)   |
|    | 8.5 | 1825 (746; 2753) | -7 (-44; 30)     | 1818 (714; 2750)  | -23512 (-105370; 23023) | 395 (70; 1066)          | -23118 (-104976; 23409) |
| 7  | 2.6 | 37 (-93; 181)    | -127 (-281; 42)  | -90 (-359; 202)   | -292 (-2152; 1018)      | -15498 (-25037; -7610)  | -15790 (-26181; -7416)  |
|    | 4.5 | 194 (-321; 812)  | -226 (-514; 109) | -31 (-786; 849)   | -1898 (-13963; 6651)    | -33972 (-55669; -17416) | -35870 (-68230; -13604) |
|    | 6.0 | 327 (-481; 1136) | -265 (-611; 134) | 62 (-1048; 1174)  | -3538 (-25023; 11873)   | -42527 (-64399; -19984) | -46065 (-86176; -10620) |
|    | 8.5 | 826 (-958; 2327) | -248 (-616; 150) | 579 (-1507; 2380) | -11760 (-88960; 40315)  | -45645 (-73424; -16550) | -57405 (-157991; 19385) |
| 8  | 2.6 | 80 (-31; 204)    | -12 (-44; 21)    | 68 (-68; 207)     | 3901 (-2964; 10875)     | 39 (-259; 408)          | 3940 (-3018; 10935)     |
|    | 4.5 | 286 (-53; 631)   | -17 (-62; 33)    | 268 (-105; 642)   | 11614 (-8859; 34760)    | 52 (-310; 484)          | 11666 (-8819; 34661)    |
|    | 6.0 | 423 (-64; 815)   | -20 (-72; 38)    | 403 (-124; 823)   | 16550 (-14480; 46146)   | 59 (-328; 484)          | 16609 (-14286; 46226)   |
|    | 8.5 | 776 (2; 1304)    | -17 (-63; 33)    | 759 (-43; 1304)   | 28791 (-30828; 81082)   | 49 (-362; 546)          | 28840 (-30741; 81086)   |
| 9  | 2.6 | 95 (-44; 250)    | -6 (-35; 24)     | 89 (-74; 265)     | 17769 (9098; 31284)     | -1962 (-3970; 77)       | 15806 (6346; 29834)     |
|    | 4.5 | 363 (-62; 785)   | -9 (-49; 34)     | 354 (-101; 798)   | 64366 (34504; 105494)   | -2522 (-5511; 283)      | 61845 (31101; 103486)   |
|    | 6.0 | 517 (-48; 977)   | -11 (-64; 42)    | 506 (-99; 993)    | 89473 (51905; 130692)   | -3215 (-7237; 244)      | 86258 (47360; 128347)   |
|    | 8.5 | 987 (125; 1546)  | -8 (-50; 34)     | 979 (94; 1554)    | 150276 (108875; 191634) | -2466 (-5701; 340)      | 147810 (106309; 189514) |
| 10 | 2.6 | 47 (-74; 176)    | -23 (-76; 36)    | 24 (-141; 196)    | 1848 (-2719; 7548)      | -12727 (-21515; -5676)  | -10879 (-23189; -403)   |
|    | 4.5 | 220 (-213; 674)  | -33 (-117; 59)   | 187 (-313; 704)   | 13657 (-10403; 49907)   | -21229 (-36336; -6947)  | -7572 (-42906; 38097)   |
|    | 6.0 | 348 (-299; 887)  | -38 (-135; 66)   | 310 (-423; 918)   | 24489 (-15831; 76492)   | -24555 (-41114; -7837)  | -66 (-52501; 62795)     |

|             |     |                    |                   |                      |                           |                           |                           |
|-------------|-----|--------------------|-------------------|----------------------|---------------------------|---------------------------|---------------------------|
|             | 8.5 | 730 (-459; 1545)   | -31 (-116; 59)    | 699 (-551; 1579)     | 66748 (-27683; 169403)    | -21966 (-38476; -5951)    | 44782 (-59989; 158025)    |
| 11          | 2.6 | 11 (-42; 69)       | -42 (-131; 50)    | -31 (-168; 103)      | 3659 (-5080; 11915)       | 326 (-50; 823)            | 3985 (-4949; 12197)       |
|             | 4.5 | 80 (-188; 359)     | -74 (-225; 102)   | 7 (-403; 432)        | 3554 (-30799; 29361)      | 502 (-57; 1644)           | 4056 (-30012; 29873)      |
|             | 6.0 | 136 (-273; 524)    | -87 (-260; 115)   | 49 (-513; 601)       | 1468 (-49499; 38002)      | 700 (-95; 1971)           | 2168 (-48969; 38280)      |
|             | 8.5 | 375 (-594; 1079)   | -80 (-255; 117)   | 295 (-807; 1141)     | -15655 (-138999; 62769)   | 538 (-66; 1839)           | -15116 (-138277; 63109)   |
| 12          | 2.6 | 31 (-46; 111)      | -10 (-52; 36)     | 21 (-94; 138)        | 8753 (-360; 21092)        | -214 (-1736; 1266)        | 8538 (-1350; 21606)       |
|             | 4.5 | 145 (-122; 418)    | -14 (-80; 56)     | 131 (-192; 458)      | 34450 (6792; 71207)       | -245 (-2282; 1666)        | 34206 (5551; 71374)       |
|             | 6.0 | 220 (-152; 563)    | -16 (-91; 64)     | 204 (-231; 606)      | 50486 (12067; 95927)      | -343 (-3048; 2172)        | 50144 (10439; 96196)      |
|             | 8.5 | 528 (-146; 1053)   | -14 (-80; 58)     | 514 (-220; 1084)     | 110027 (36483; 198202)    | -262 (-2365; 1711)        | 109765 (36731; 197837)    |
| 13          | 2.6 | 66 (-9; 150)       | -1 (-7; 5)        | 65 (-14; 151)        | -833 (-7944; 3174)        | 388 (99; 798)             | -445 (-7722; 3556)        |
|             | 4.5 | 211 (7; 382)       | -1 (-9; 7)        | 210 (2; 383)         | -9626 (-34696; 3196)      | 507 (114; 1112)           | -9120 (-34267; 3617)      |
|             | 6.0 | 307 (30; 479)      | -2 (-11; 8)       | 306 (22; 480)        | -17696 (-51927; 2484)     | 559 (202; 984)            | -17138 (-51330; 3024)     |
|             | 8.5 | 531 (136; 758)     | -1 (-9; 7)        | 529 (132; 759)       | -51578 (-146787; -3996)   | 464 (95; 1391)            | -51114 (-146201; -3657)   |
| BARMM       | 2.6 | 8 (-17; 35)        | -10 (-32; 16)     | -2 (-48; 45)         | 17287 (9280; 31559)       | -384 (-1450; 678)         | 16902 (8399; 31491)       |
|             | 4.5 | 44 (-58; 145)      | -15 (-50; 27)     | 30 (-103; 162)       | 59961 (34283; 96510)      | -433 (-1884; 877)         | 59528 (33745; 95889)      |
|             | 6.0 | 69 (-80; 197)      | -17 (-59; 31)     | 52 (-134; 213)       | 81465 (50205; 119390)     | -628 (-2770; 1131)        | 80837 (49187; 118935)     |
|             | 8.5 | 158 (-137; 339)    | -15 (-55; 30)     | 142 (-191; 353)      | 135554 (94573; 179975)    | -453 (-2078; 852)         | 135101 (94508; 179318)    |
| Philippines | 2.6 | 1077 (-483; 2892)  | -441 (-1154; 299) | 636 (-1424; 2986)    | 67692 (10005; 145569)     | -66781 (-124268; -20989)  | 910 (-103758; 99762)      |
|             | 4.5 | 4299 (-587; 9528)  | -817 (-2040; 537) | 3483 (-2502; 9637)   | 213431 (-3283; 482692)    | -148063 (-251042; -44041) | 65368 (-236416; 407278)   |
|             | 6.0 | 6419 (-677; 12686) | -905 (-2320; 633) | 5514 (-2800; 12812)  | 290814 (-41193; 645911)   | -179884 (-302658; -48229) | 110930 (-325664; 561927)  |
|             | 8.5 | 12657 (498; 22102) | -903 (-2282; 639) | 11754 (-1620; 22163) | 472406 (-304838; 1184763) | -208684 (-360041; -44569) | 263723 (-640202; 1094790) |

CAR=Cordillera Administrative Region; NCR=National Capital Region; BARMM=Bangsamoro Autonomous Region in Muslim Mindanao; eCI=empirical confidence interval; RCP=representative concentration pathway

**Table S15. Regional temperature-attributable numbers of deaths due to enteric infections in 2090-2099 relative to 2010-2019 by representative concentration pathways and shared socioeconomic pathways**

| Region | RCP | Number of deaths due to enteric infections (95%eCI) |                  |                   |                   |                   |
|--------|-----|-----------------------------------------------------|------------------|-------------------|-------------------|-------------------|
|        |     | SSP 1                                               | SSP 2            | SSP 3             | SSP 4             | SSP 5             |
| CAR    | 2.6 | 70 (-4; 130)                                        | 79 (-7; 145)     | NA                | 163 (-37; 298)    | NA                |
|        | 4.5 | 184 (9; 286)                                        | 195 (7; 304)     | 305 (-13; 491)    | 305 (-13; 491)    | 184 (9; 286)      |
|        | 6.0 | 245 (17; 372)                                       | 258 (15; 390)    | 380 (-1; 592)     | 380 (-1; 592)     | 245 (17; 372)     |
|        | 8.5 | NA                                                  | NA               | NA                | NA                | 416 (52; 576)     |
| 1      | 2.6 | 71 (-73; 211)                                       | 149 (-104; 378)  | NA                | 230 (-136; 551)   | NA                |
|        | 4.5 | 253 (-120; 592)                                     | 388 (-167; 872)  | 586 (-236; 1286)  | 532 (-219; 1175)  | 234 (-114; 552)   |
|        | 6.0 | 361 (-144; 785)                                     | 529 (-197; 1128) | 775 (-269; 1623)  | 709 (-250; 1492)  | 338 (-136; 739)   |
|        | 8.5 | NA                                                  | NA               | NA                | NA                | 657 (-122; 1256)  |
| 2      | 2.6 | 55 (-71; 162)                                       | 108 (-123; 290)  | NA                | 227 (-238; 577)   | NA                |
|        | 4.5 | 164 (-122; 384)                                     | 239 (-183; 557)  | 448 (-351; 1039)  | 405 (-315; 941)   | 155 (-116; 364)   |
|        | 6.0 | 229 (-145; 497)                                     | 316 (-212; 687)  | 560 (-391; 1224)  | 510 (-357; 1111)  | 218 (-137; 476)   |
|        | 8.5 | NA                                                  | NA               | NA                | NA                | 416 (-175; 803)   |
| 3      | 2.6 | 23 (-136; 205)                                      | 69 (-113; 263)   | NA                | 152 (-81; 392)    | NA                |
|        | 4.5 | 153 (-304; 614)                                     | 236 (-319; 790)  | 409 (-374; 1177)  | 385 (-365; 1122)  | 146 (-303; 596)   |
|        | 6.0 | 254 (-349; 867)                                     | 365 (-388; 1117) | 591 (-476; 1632)  | 560 (-462; 1563)  | 245 (-345; 846)   |
|        | 8.5 | NA                                                  | NA               | NA                | NA                | 617 (-443; 1594)  |
| NCR    | 2.6 | 397 (14; 880)                                       | 541 (93; 1063)   | NA                | 1271 (503; 2040)  | NA                |
|        | 4.5 | 1153 (37; 2348)                                     | 1388 (152; 2698) | 1572 (240; 2975)  | 2576 (706; 4467)  | 1116 (12; 2296)   |
|        | 6.0 | 1720 (277; 3149)                                    | 2016 (416; 3604) | 2242 (526; 3942)  | 3500 (1085; 5781) | 1676 (253; 3085)  |
|        | 8.5 | NA                                                  | NA               | NA                | NA                | 3499 (1358; 5375) |
| 4A     | 2.6 | 370 (-129; 875)                                     | 550 (-125; 1241) | NA                | 1036 (-149; 2218) | NA                |
|        | 4.5 | 1055 (228; 1873)                                    | 1370 (257; 2423) | 1921 (329; 3374)  | 2208 (362; 3888)  | 963 (209; 1714)   |
|        | 6.0 | 1488 (439; 2398)                                    | 1878 (515; 3063) | 2557 (669; 4174)  | 2912 (736; 4770)  | 1374 (408; 2223)  |
|        | 8.5 | NA                                                  | NA               | NA                | NA                | 2415 (1060; 3588) |
| 4B     | 2.6 | 49 (-107; 197)                                      | 64 (-130; 243)   | NA                | 89 (-168; 317)    | NA                |
|        | 4.5 | 214 (-219; 593)                                     | 247 (-251; 675)  | 420 (-431; 1131)  | 299 (-304; 808)   | 213 (-218; 589)   |
|        | 6.0 | 321 (-270; 774)                                     | 362 (-304; 869)  | 596 (-505; 1426)  | 431 (-362; 1034)  | 319 (-268; 770)   |
|        | 8.5 | NA                                                  | NA               | NA                | NA                | 679 (-285; 1319)  |
| 5      | 2.6 | 109 (-146; 421)                                     | 189 (-234; 651)  | NA                | 337 (-400; 1072)  | NA                |
|        | 4.5 | 428 (-250; 1094)                                    | 591 (-360; 1497) | 983 (-618; 2459)  | 887 (-556; 2219)  | 416 (-242; 1066)  |
|        | 6.0 | 665 (-288; 1449)                                    | 884 (-406; 1933) | 1413 (-680; 3100) | 1284 (-617; 2814) | 650 (-280; 1413)  |
|        | 8.5 | NA                                                  | NA               | NA                | NA                | 1261 (-159; 2328) |
| 6      | 2.6 | 313 (-129; 755)                                     | 521 (-195; 1229) | NA                | 907 (-375; 2122)  | NA                |
|        | 4.5 | 1005 (85; 1984)                                     | 1409 (67; 2775)  | 2353 (24; 4662)   | 2158 (35; 4274)   | 967 (85; 1913)    |
|        | 6.0 | 1479 (241; 2498)                                    | 2005 (274; 3420) | 3236 (360; 5596)  | 2982 (341; 5152)  | 1432 (243; 2418)  |
|        | 8.5 | NA                                                  | NA               | NA                | NA                | 2620 (972; 4001)  |
| 7      | 2.6 | -64 (-428; 307)                                     | 0 (-383; 366)    | NA                | 153 (-287; 549)   | NA                |

|             |     |                      |                      |                      |                      |                      |
|-------------|-----|----------------------|----------------------|----------------------|----------------------|----------------------|
|             | 4.5 | 39 (-1090; 1336)     | 128 (-1192; 1628)    | 328 (-1401; 2298)    | 343 (-1418; 2341)    | 35 (-1086; 1322)     |
|             | 6.0 | 189 (-1468; 1839)    | 317 (-1621; 2231)    | 606 (-1999; 3154)    | 627 (-2025; 3225)    | 182 (-1464; 1822)    |
|             | 8.5 | NA                   | NA                   | NA                   | NA                   | 975 (-2209; 3689)    |
| 8           | 2.6 | 127 (-139; 380)      | 217 (-209; 594)      | NA                   | 370 (-341; 966)      | NA                   |
|             | 4.5 | 464 (-226; 1140)     | 645 (-318; 1554)     | 1103 (-561; 2613)    | 954 (-483; 2268)     | 464 (-226; 1139)     |
|             | 6.0 | 698 (-263; 1462)     | 940 (-366; 1965)     | 1558 (-615; 3254)    | 1358 (-534; 2835)    | 697 (-263; 1460)     |
|             | 8.5 | NA                   | NA                   | NA                   | NA                   | 1324 (-125; 2323)    |
| 9           | 2.6 | 179 (-148; 517)      | 244 (-205; 678)      | NA                   | 400 (-333; 1055)     | NA                   |
|             | 4.5 | 680 (-194; 1521)     | 845 (-253; 1884)     | 1363 (-440; 3038)    | 1234 (-394; 2752)    | 641 (-181; 1437)     |
|             | 6.0 | 967 (-190; 1891)     | 1191 (-244; 2334)    | 1885 (-419; 3703)    | 1712 (-376; 3357)    | 916 (-179; 1787)     |
|             | 8.5 | NA                   | NA                   | NA                   | NA                   | 1761 (166; 2800)     |
| 10          | 2.6 | 55 (-239; 359)       | 92 (-288; 472)       | NA                   | 167 (-387; 701)      | NA                   |
|             | 4.5 | 348 (-548; 1264)     | 453 (-666; 1593)     | 703 (-947; 2359)     | 661 (-901; 2230)     | 338 (-539; 1235)     |
|             | 6.0 | 565 (-741; 1649)     | 722 (-901; 2068)     | 1095 (-1262; 3045)   | 1033 (-1198; 2883)   | 552 (-728; 1608)     |
|             | 8.5 | NA                   | NA                   | NA                   | NA                   | 1229 (-962; 2755)    |
| 11          | 2.6 | -46 (-288; 184)      | -23 (-271; 198)      | NA                   | 21 (-250; 247)       | NA                   |
|             | 4.5 | 25 (-732; 812)       | 66 (-801; 971)       | 156 (-967; 1322)     | 144 (-946; 1276)     | 20 (-719; 788)       |
|             | 6.0 | 107 (-940; 1131)     | 166 (-1058; 1350)    | 304 (-1318; 1866)    | 284 (-1280; 1794)    | 98 (-926; 1097)      |
|             | 8.5 | NA                   | NA                   | NA                   | NA                   | 550 (-1463; 2086)    |
| 12          | 2.6 | 59 (-160; 289)       | 85 (-186; 357)       | NA                   | 135 (-234; 498)      | NA                   |
|             | 4.5 | 290 (-324; 921)      | 363 (-384; 1123)     | 549 (-538; 1638)     | 507 (-504; 1523)     | 281 (-318; 896)      |
|             | 6.0 | 439 (-396; 1215)     | 543 (-462; 1477)     | 811 (-640; 2151)     | 753 (-603; 2003)     | 427 (-387; 1183)     |
|             | 8.5 | NA                   | NA                   | NA                   | NA                   | 1011 (-348; 2093)    |
| 13          | 2.6 | 159 (-38; 363)       | 233 (-88; 511)       | NA                   | 398 (-207; 865)      | NA                   |
|             | 4.5 | 492 (-1; 907)        | 620 (-42; 1151)      | 927 (-136; 1738)     | 908 (-133; 1703)     | 474 (2; 876)         |
|             | 6.0 | 713 (43; 1123)       | 872 (15; 1397)       | 1265 (-41; 2079)     | 1243 (-39; 2039)     | 690 (47; 1085)       |
|             | 8.5 | NA                   | NA                   | NA                   | NA                   | 1195 (296; 1718)     |
| BARMM       | 2.6 | 3 (-132; 144)        | 7 (-132; 151)        | NA                   | 18 (-134; 176)       | NA                   |
|             | 4.5 | 106 (-283; 498)      | 114 (-294; 520)      | 148 (-334; 619)      | 148 (-334; 619)      | 106 (-283; 498)      |
|             | 6.0 | 172 (-373; 654)      | 184 (-382; 681)      | 234 (-432; 814)      | 234 (-432; 814)      | 172 (-373; 654)      |
|             | 8.5 | NA                   | NA                   | NA                   | NA                   | 441 (-533; 1076)     |
| Philippines | 2.6 | 1929 (-1991; 6161)   | 3125 (-2274; 8581)   | NA                   | 6076 (-2555; 14207)  | NA                   |
|             | 4.5 | 7054 (-3902; 18027)  | 9296 (-4552; 22860)  | 14276 (-6538; 33957) | 14654 (-5556; 33770) | 6752 (-3858; 17437)  |
|             | 6.0 | 10611 (-4396; 23659) | 13548 (-5056; 29601) | 20108 (-7138; 43085) | 20514 (-6156; 43051) | 10234 (-4361; 22941) |
|             | 8.5 | NA                   | NA                   | NA                   | NA                   | 21068 (-2481; 39163) |

CAR=Cordillera Administrative Region; NCR=National Capital Region; BARMM=Bangsamoro Autonomous Region in Muslim Mindanao; eCI=empirical confidence interval; RCP=representative concentration pathway; SSP=shared socioeconomic pathway; NA=unlikely SSP–RCP combination

**Table S16. Regional temperature-attributable numbers of hospital admissions due to enteric infections in 2090-2099 relative to 2010-2019 by representative concentration pathways and shared socioeconomic pathways**

| Region | RCP | Number of hospital admissions due to enteric infections (95%eCI) |                        |                        |                        |                         |
|--------|-----|------------------------------------------------------------------|------------------------|------------------------|------------------------|-------------------------|
|        |     | SSP 1                                                            | SSP 2                  | SSP 3                  | SSP 4                  | SSP 5                   |
| CAR    | 2.6 | 4128 (33; 8213)                                                  | 9766 (-437; 18830)     | NA                     | 18562 (-966; 35732)    | NA                      |
|        | 4.5 | 10526 (1283; 19452)                                              | 18804 (1638; 34477)    | 35998 (2479; 66108)    | 31725 (2334; 58281)    | 9850 (1233; 18219)      |
|        | 6.0 | 14017 (1912; 25405)                                              | 23656 (2730; 42680)    | 43692 (3916; 78574)    | 38716 (3615; 69594)    | 13229 (1877; 23969)     |
|        | 8.5 | NA                                                               | NA                     | NA                     | NA                     | 23350 (3948; 40253)     |
| 1      | 2.6 | -8551 (-14445; -3350)                                            | 6967 (-3444; 18500)    | NA                     | 26446 (-39; 52590)     | NA                      |
|        | 4.5 | -21693 (-39232; -6261)                                           | -12302 (-26948; -1598) | 5649 (-6079; 33581)    | -561 (-12390; 21051)   | -22352 (-40208; -6425)  |
|        | 6.0 | -28646 (-54112; -6971)                                           | -22197 (-48112; -5141) | -9925 (-39040; 14187)  | -14186 (-42162; 4686)  | -29101 (-54652; -7079)  |
|        | 8.5 | NA                                                               | NA                     | NA                     | NA                     | -46723 (-96831; -4007)  |
| 2      | 2.6 | 7868 (4030; 11430)                                               | 39933 (21467; 54804)   | NA                     | 84614 (45188; 116284)  | NA                      |
|        | 4.5 | 13280 (5634; 20417)                                              | 48001 (25334; 65738)   | 124467 (66502; 170017) | 96402 (51549; 131692)  | 10761 (3886; 17405)     |
|        | 6.0 | 16101 (6161; 25485)                                              | 52072 (26773; 72082)   | 131314 (69893; 178592) | 102237 (54825; 139297) | 13493 (4315; 22479)     |
|        | 8.5 | NA                                                               | NA                     | NA                     | NA                     | 20635 (4908; 35079)     |
| 3      | 2.6 | -1323 (-10422; 10466)                                            | 18314 (-6863; 44203)   | NA                     | 54488 (-4620; 109601)  | NA                      |
|        | 4.5 | -19034 (-31571; -7699)                                           | -6001 (-18534; 15389)  | 22569 (-17681; 73426)  | 17962 (-17359; 63850)  | -20236 (-33244; -8547)  |
|        | 6.0 | -26353 (-46665; -9538)                                           | -15769 (-33526; 6737)  | 7397 (-19360; 58686)   | 3653 (-19886; 50235)   | -27328 (-48153; -9988)  |
|        | 8.5 | NA                                                               | NA                     | NA                     | NA                     | -43729 (-89066; -4851)  |
| NCR    | 2.6 | 6317 (-4765; 27966)                                              | 10375 (-4032; 36168)   | NA                     | 34922 (-12815; 87745)  | NA                      |
|        | 4.5 | -5276 (-47347; 28027)                                            | -2374 (-46590; 31130)  | 1443 (-47528; 34827)   | 15279 (-46302; 51082)  | -6052 (-47368; 27216)   |
|        | 6.0 | -4092 (-69246; 48665)                                            | -1039 (-71702; 53867)  | 2978 (-75547; 60370)   | 17551 (-86924; 85780)  | -4913 (-68707; 47464)   |
|        | 8.5 | NA                                                               | NA                     | NA                     | NA                     | 8925 (-133270; 114886)  |
| 4A     | 2.6 | 56 (-10934; 20219)                                               | 8037 (-3783; 35032)    | NA                     | 31197 (4006; 78383)    | NA                      |
|        | 4.5 | -15833 (-39500; 4962)                                            | -11058 (-36953; 9706)  | -2051 (-32095; 18408)  | 2804 (-29527; 23164)   | -16493 (-39822; 4409)   |
|        | 6.0 | -17540 (-53604; 16453)                                           | -12919 (-53418; 24143) | -4200 (-52898; 39858)  | 505 (-52810; 47638)    | -18181 (-53663; 15383)  |
|        | 8.5 | NA                                                               | NA                     | NA                     | NA                     | -8557 (-79580; 65341)   |
| 4B     | 2.6 | -1889 (-6320; 2908)                                              | 827 (-953; 3512)       | NA                     | 2972 (-2220; 8742)     | NA                      |
|        | 4.5 | -4277 (-13990; 5071)                                             | -3109 (-12654; 3928)   | -1041 (-10649; 4703)   | -2194 (-11856; 3214)   | -4340 (-14051; 5129)    |
|        | 6.0 | -5919 (-18699; 6394)                                             | -5750 (-20180; 5979)   | -5475 (-23049; 5657)   | -5631 (-21401; 5782)   | -5927 (-18655; 6368)    |
|        | 8.5 | NA                                                               | NA                     | NA                     | NA                     | -12078 (-39095; 9560)   |
| 5      | 2.6 | 10227 (3998; 17054)                                              | 36491 (17077; 53793)   | NA                     | 75062 (35172; 109331)  | NA                      |
|        | 4.5 | 20421 (7733; 34707)                                              | 51156 (23593; 75889)   | 117197 (55483; 168387) | 96316 (45370; 139069)  | 17995 (6507; 31742)     |
|        | 6.0 | 26233 (8807; 43423)                                              | 59300 (26756; 87229)   | 130363 (62125; 185350) | 107897 (50537; 154038) | 23622 (7006; 40067)     |
|        | 8.5 | NA                                                               | NA                     | NA                     | NA                     | 34027 (5467; 61621)     |
| 6      | 2.6 | 10274 (-1963; 20486)                                             | 32293 (2584; 57192)    | NA                     | 69560 (8321; 121037)   | NA                      |
|        | 4.5 | 8523 (-20635; 27975)                                             | 29616 (-18816; 65882)  | 74257 (-20299; 148985) | 65332 (-19952; 132316) | 6701 (-21268; 24767)    |
|        | 6.0 | 4433 (-37220; 31795)                                             | 23723 (-40374; 68548)  | 64528 (-50751; 151488) | 56364 (-48727; 134974) | 2767 (-36910; 28642)    |
|        | 8.5 | NA                                                               | NA                     | NA                     | NA                     | -20336 (-110426; 31385) |
| 7      | 2.6 | -7743 (-16158; 4991)                                             | 4080 (-8059; 25262)    | NA                     | 29431 (-997; 69610)    | NA                      |



|             |       |                          |                           |                           |                          |                           |
|-------------|-------|--------------------------|---------------------------|---------------------------|--------------------------|---------------------------|
| 8           | 4.5   | -32434 (-67523; -12155)  | -27703 (-67311; -9266)    | -18221 (-67383; 10721)    | -17587 (-67210; 12313)   | -32938 (-67700; -12452)   |
|             | 6.0   | -44477 (-88770; -7444)   | -42709 (-94534; -3041)    | -39223 (-106433; 6964)    | -38975 (-107254; 7603)   | -44668 (-88004; -7969)    |
|             | 8.5   | NA                       | NA                        | NA                        | NA                       | -58911 (-174532; 26718)   |
|             | 2.6   | 5956 (-4762; 15400)      | 15631 (-16914; 42139)     | NA                        | 30368 (-35477; 85649)    | NA                        |
|             | 4.5   | 14455 (-10796; 40112)    | 27983 (-22155; 71683)     | 58531 (-49241; 148530)    | 48614 (-38993; 123590)   | 13414 (-9940; 37969)      |
| 9           | 6.0   | 19879 (-15398; 52817)    | 35783 (-27275; 88672)     | 71688 (-55556; 173323)    | 60032 (-46643; 145459)   | 18655 (-14820; 50326)     |
|             | 8.5   | NA                       | NA                        | NA                        | NA                       | 31658 (-31845; 87357)     |
|             | 2.6   | 17583 (7430; 32218)      | 34532 (18646; 56681)      | NA                        | 57726 (33658; 90321)     | NA                        |
|             | 4.5   | 66004 (33805; 109773)    | 106350 (57853; 171978)    | 196144 (110866; 310754)   | 161688 (90548; 257487)   | 63060 (32034; 105218)     |
|             | 6.0   | 91670 (50831; 135725)    | 144644 (84026; 211110)    | 262531 (157251; 379148)   | 217299 (129184; 314649)  | 87802 (48435; 130318)     |
| 10          | 8.5   | NA                       | NA                        | NA                        | NA                       | 150116 (108070; 192394)   |
|             | 2.6   | -9522 (-22012; 579)      | -3013 (-17514; 5862)      | NA                        | 6383 (-11101; 16290)     | NA                        |
|             | 4.5   | -6104 (-43078; 41991)    | 2170 (-46311; 67137)      | 19850 (-54721; 120844)    | 14178 (-51929; 103158)   | -6739 (-42769; 40009)     |
|             | 6.0   | 2108 (-53476; 68383)     | 14754 (-60487; 105213)    | 41781 (-74153; 185803)    | 33111 (-69772; 160023)   | 1138 (-52769; 65444)      |
|             | 8.5   | NA                       | NA                        | NA                        | NA                       | 47254 (-60512; 163583)    |
| 11          | 2.6   | 6701 (-5066; 17086)      | 26209 (-8749; 55618)      | NA                        | 54098 (-15023; 112181)   | NA                        |
|             | 4.5   | 6827 (-30257; 34419)     | 26290 (-36944; 75033)     | 67476 (-54522; 165594)    | 54095 (-48733; 136128)   | 5346 (-30082; 31579)      |
|             | 6.0   | 4753 (-49372; 42976)     | 22990 (-61496; 84549)     | 61590 (-94059; 179123)    | 49052 (-83482; 148417)   | 3365 (-48985; 40421)      |
|             | 8.5   | NA                       | NA                        | NA                        | NA                       | -14255 (-140012; 65866)   |
|             | 12    | 2.6                      | 9548 (-1801; 23714)       | 18648 (-6186; 44363)      | NA                       | 31224 (-12748; 74136)     |
| 4.5         |       | 36532 (5397; 76011)      | 58464 (4991; 120152)      | 106832 (3407; 220911)     | 88871 (3761; 183753)     | 34913 (5545; 72878)       |
| 6.0         |       | 53338 (10957; 101800)    | 83603 (14683; 159008)     | 150309 (22755; 287958)    | 125532 (20008; 239468)   | 51100 (10690; 97721)      |
| 8.5         |       | NA                       | NA                        | NA                        | NA                       | 111517 (37432; 200874)    |
| 13          |       | 2.6                      | 726 (-7302; 5477)         | 12730 (-5109; 26758)      | NA                       | 28953 (-4089; 55667)      |
|             | 4.5   | -8304 (-34763; 5456)     | -651 (-42995; 25053)      | 15853 (-62894; 69304)     | 9638 (-55422; 52684)     | -8849 (-34354; 4110)      |
|             | 6.0   | -16718 (-52692; 4664)    | -13123 (-70361; 22739)    | -5395 (-107598; 62834)    | -8319 (-93363; 47923)    | -16974 (-51472; 3506)     |
|             | 8.5   | NA                       | NA                        | NA                        | NA                       | -51247 (-147098; -3340)   |
|             | BARMM | 2.6                      | 18586 (9254; 33942)       | 36721 (18712; 62048)      | NA                       | 61363 (31535; 99994)      |
| 4.5         |       | 63089 (36031; 101188)    | 101868 (58978; 158739)    | 184841 (107492; 283703)   | 154694 (89773; 238407)   | 60297 (34345; 96927)      |
| 6.0         |       | 85338 (52178; 124853)    | 134515 (83795; 193119)    | 239693 (150009; 340872)   | 201471 (125837; 287327)  | 81796 (49916; 119992)     |
| 8.5         |       | NA                       | NA                        | NA                        | NA                       | 136444 (95461; 180959)    |
| Philippines |       | 2.6                      | 68940 (-36333; 152541)    | 308541 (112962; 459318)   | NA                       | 697369 (367375; 948028)   |
|             | 4.5   | 126701 (-203065; 483550) | 407503 (-62144; 893935)   | 1009793 (218132; 1792539) | 837257 (155319; 1515521) | 104338 (-212363; 453653)  |
|             | 6.0   | 174123 (-302558; 658821) | 481532 (-182823; 1136222) | 1143645 (65151; 2163040)  | 946308 (-27261; 1854891) | 149875 (-309858; 621187)  |
|             | 8.5   | NA                       | NA                        | NA                        | NA                       | 308091 (-690514; 1202483) |

CAR=Cordillera Administrative Region; NCR=National Capital Region; BARMM=Bangsamoro Autonomous Region in Muslim Mindanao; eCI=empirical confidence interval; RCP=representative concentration pathway; SSP=shared socioeconomic pathway; NA=unlikely SSP-RCP combination

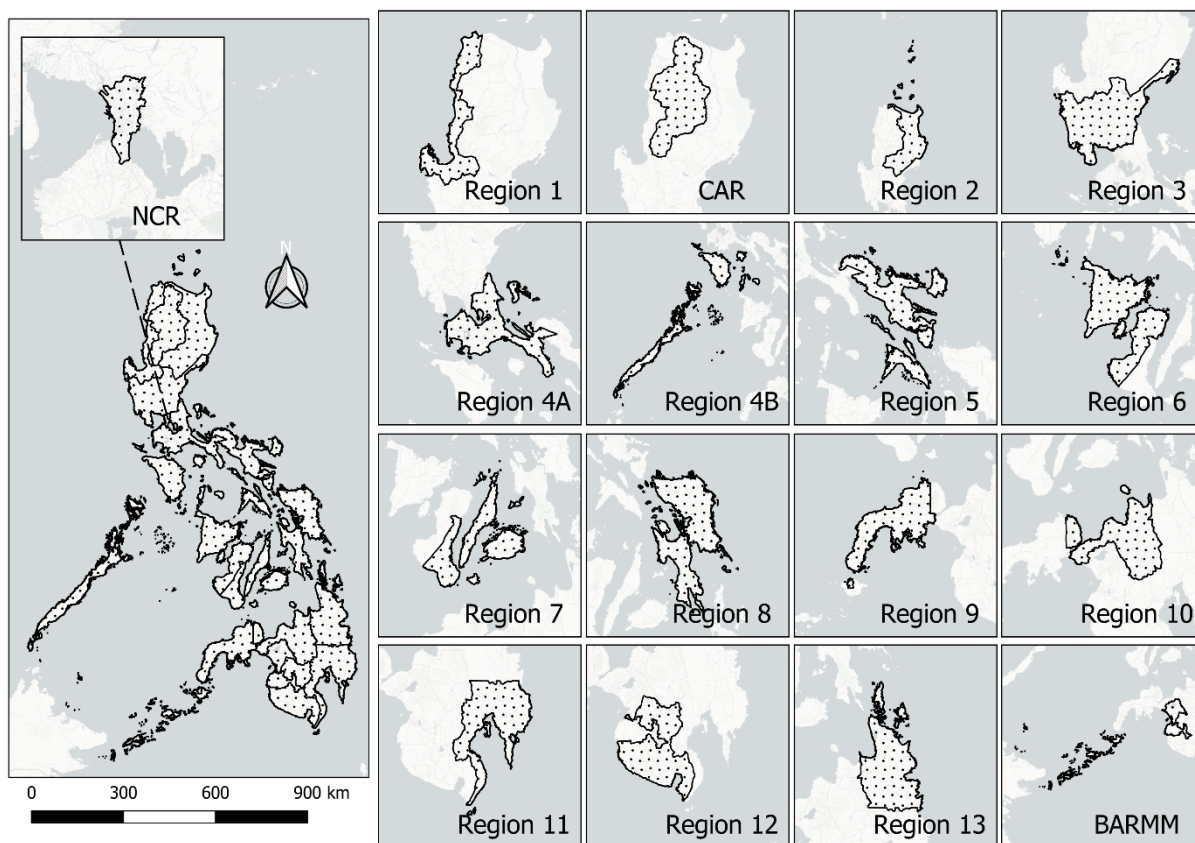

**Figure S1. Philippine administrative regions.**

NCR=National Capital Region; CAR=Cordillera Autonomous Region; BARMM=Bangsamoro Autonomous Region of Muslim Mindanao

Note: Table S1 lists the full names of the regions.

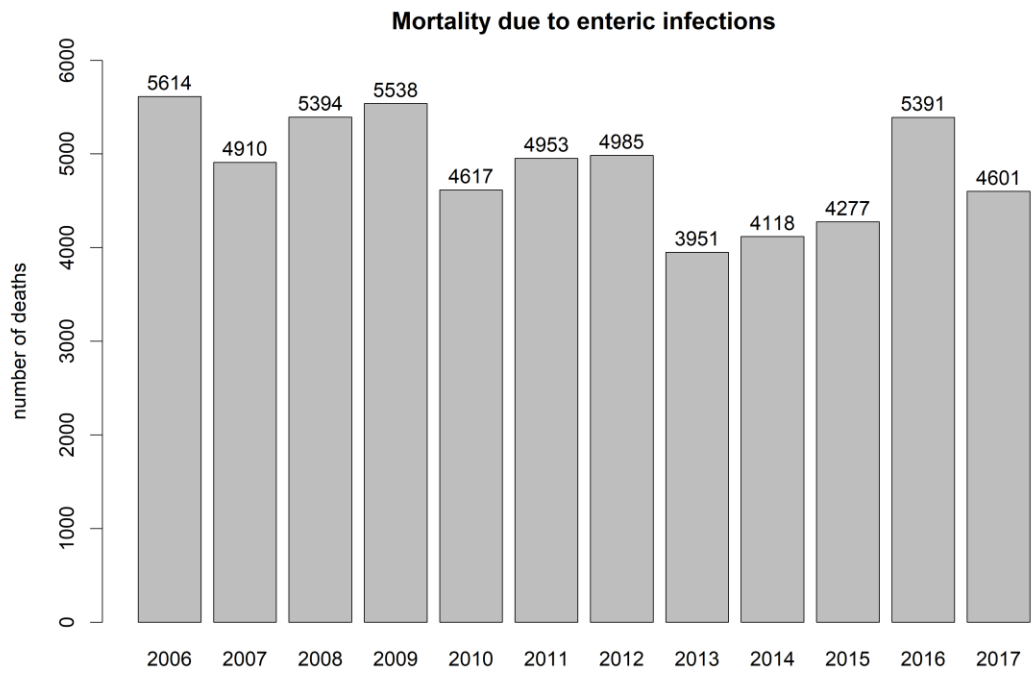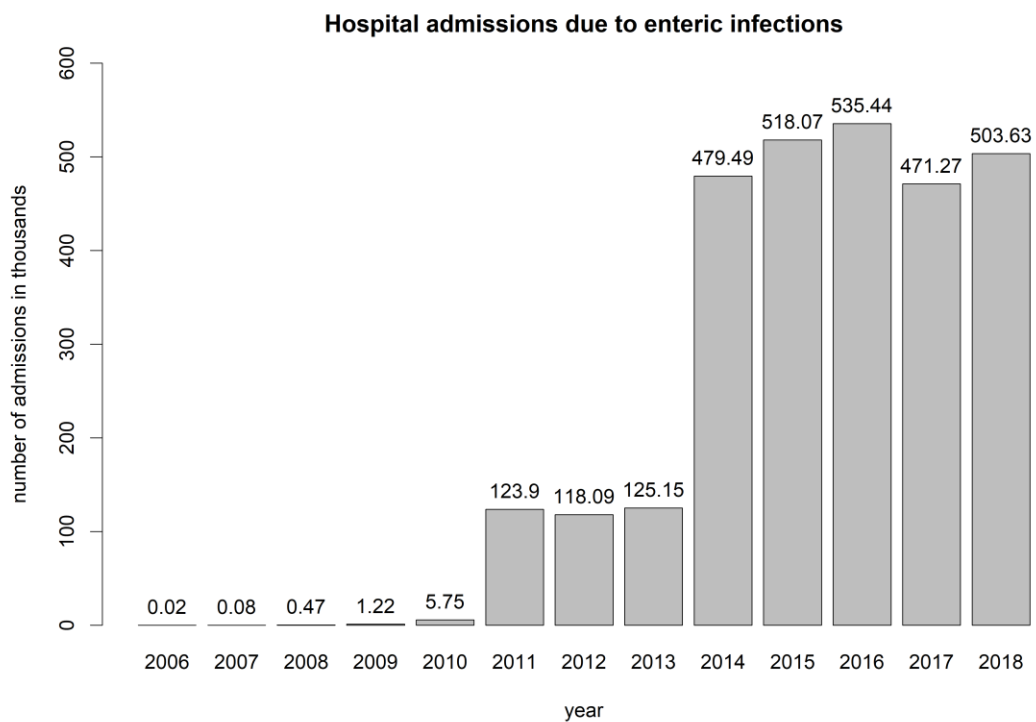

**Figure S2. Annual deaths and hospital admissions due to enteric infections in the Philippines in 2006–2018**

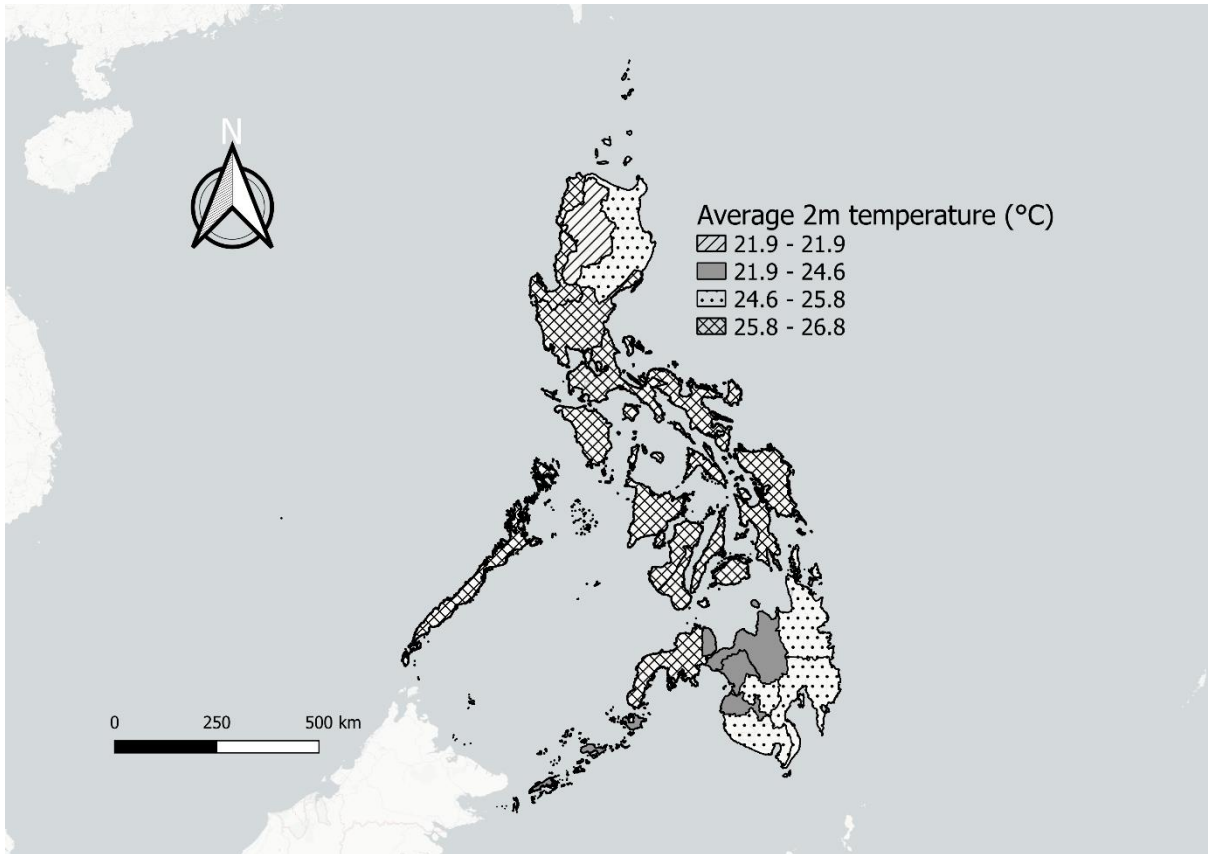

**Figure S3. Average 2-meter temperatures per administrative region**  
Note: See Figure S1 to see exact boundaries of each region

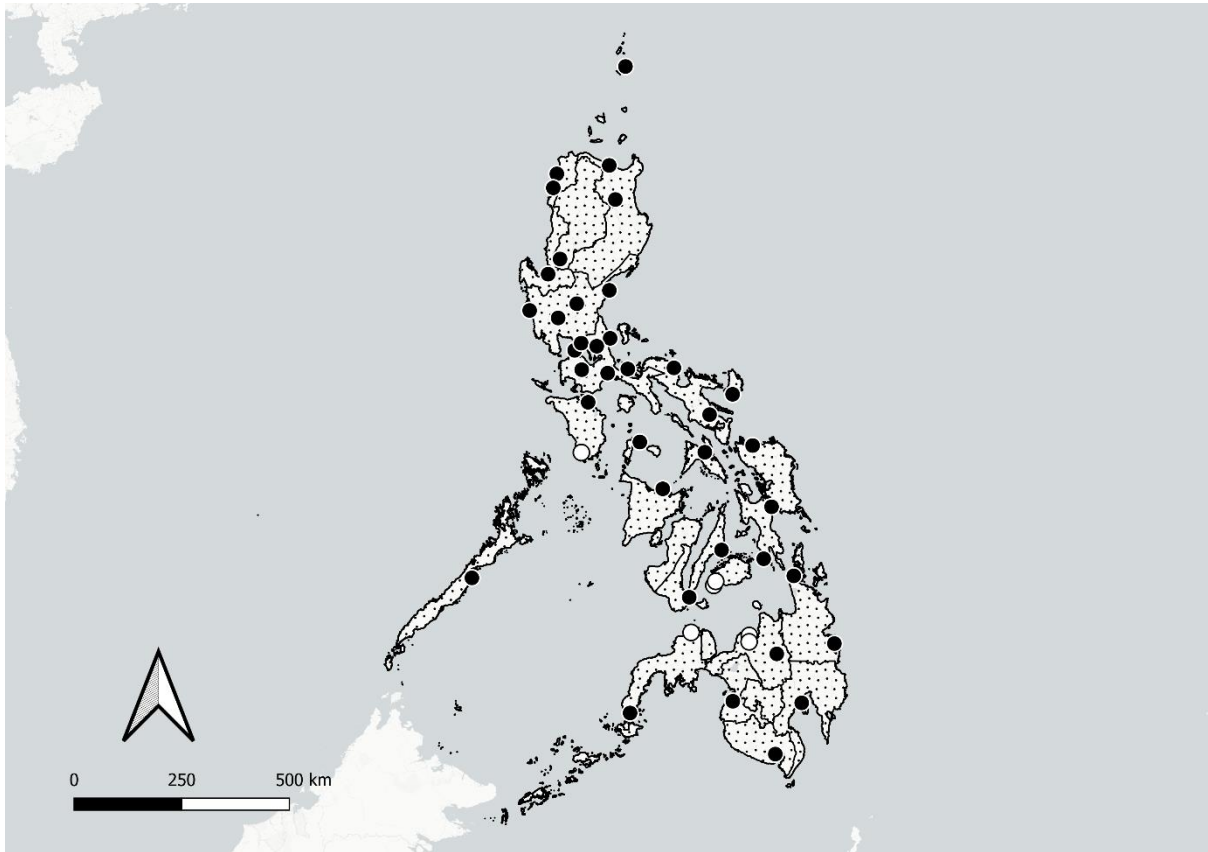

**Figure S4. Weather stations in the Philippines.** Black dots have imputable mean temperature data and white dots have more than 10% missing data.

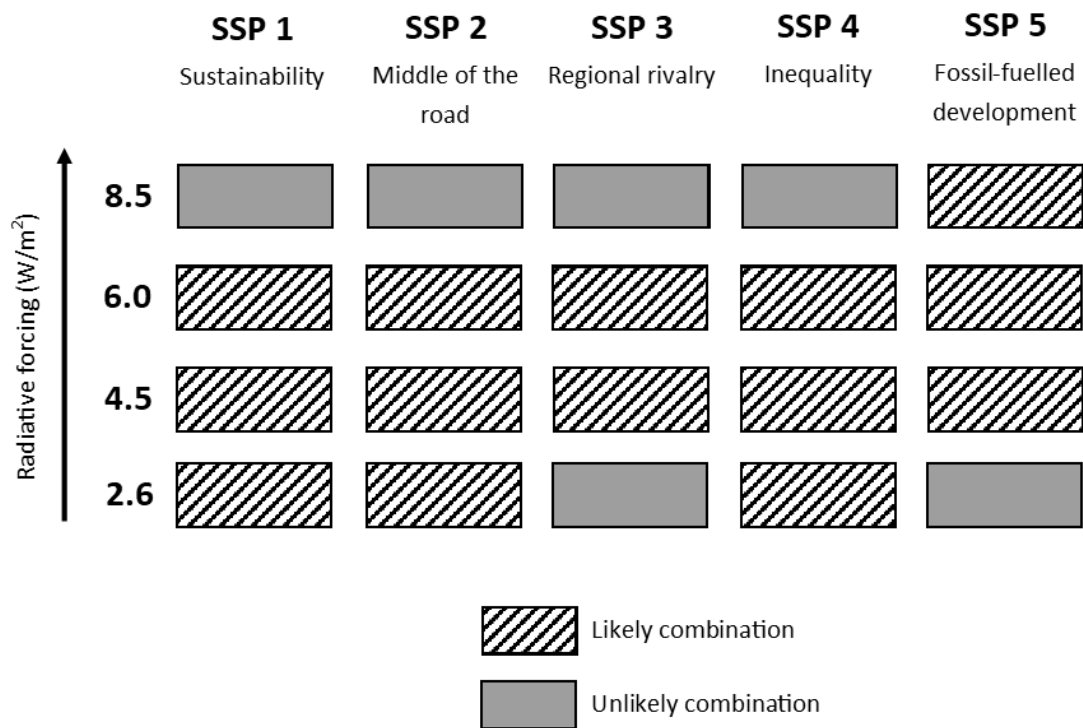

**Figure S5. Likely and unlikely combinations of Shared Socioeconomic Pathways (SSP) and Representative Concentration Pathways (RCP) expressed in radiative forcing**

This figure is based from: Riahi K, van Vuuren DP, Kriegler E, Edmonds J, O'Neill BC, Fujimori S, et al. 2017. The Shared Socioeconomic Pathways and their energy, land use, and greenhouse gas emissions implications: An overview. *Glob Environ Chang*; doi:10.1016/j.gloenvcha.2016.05.009.

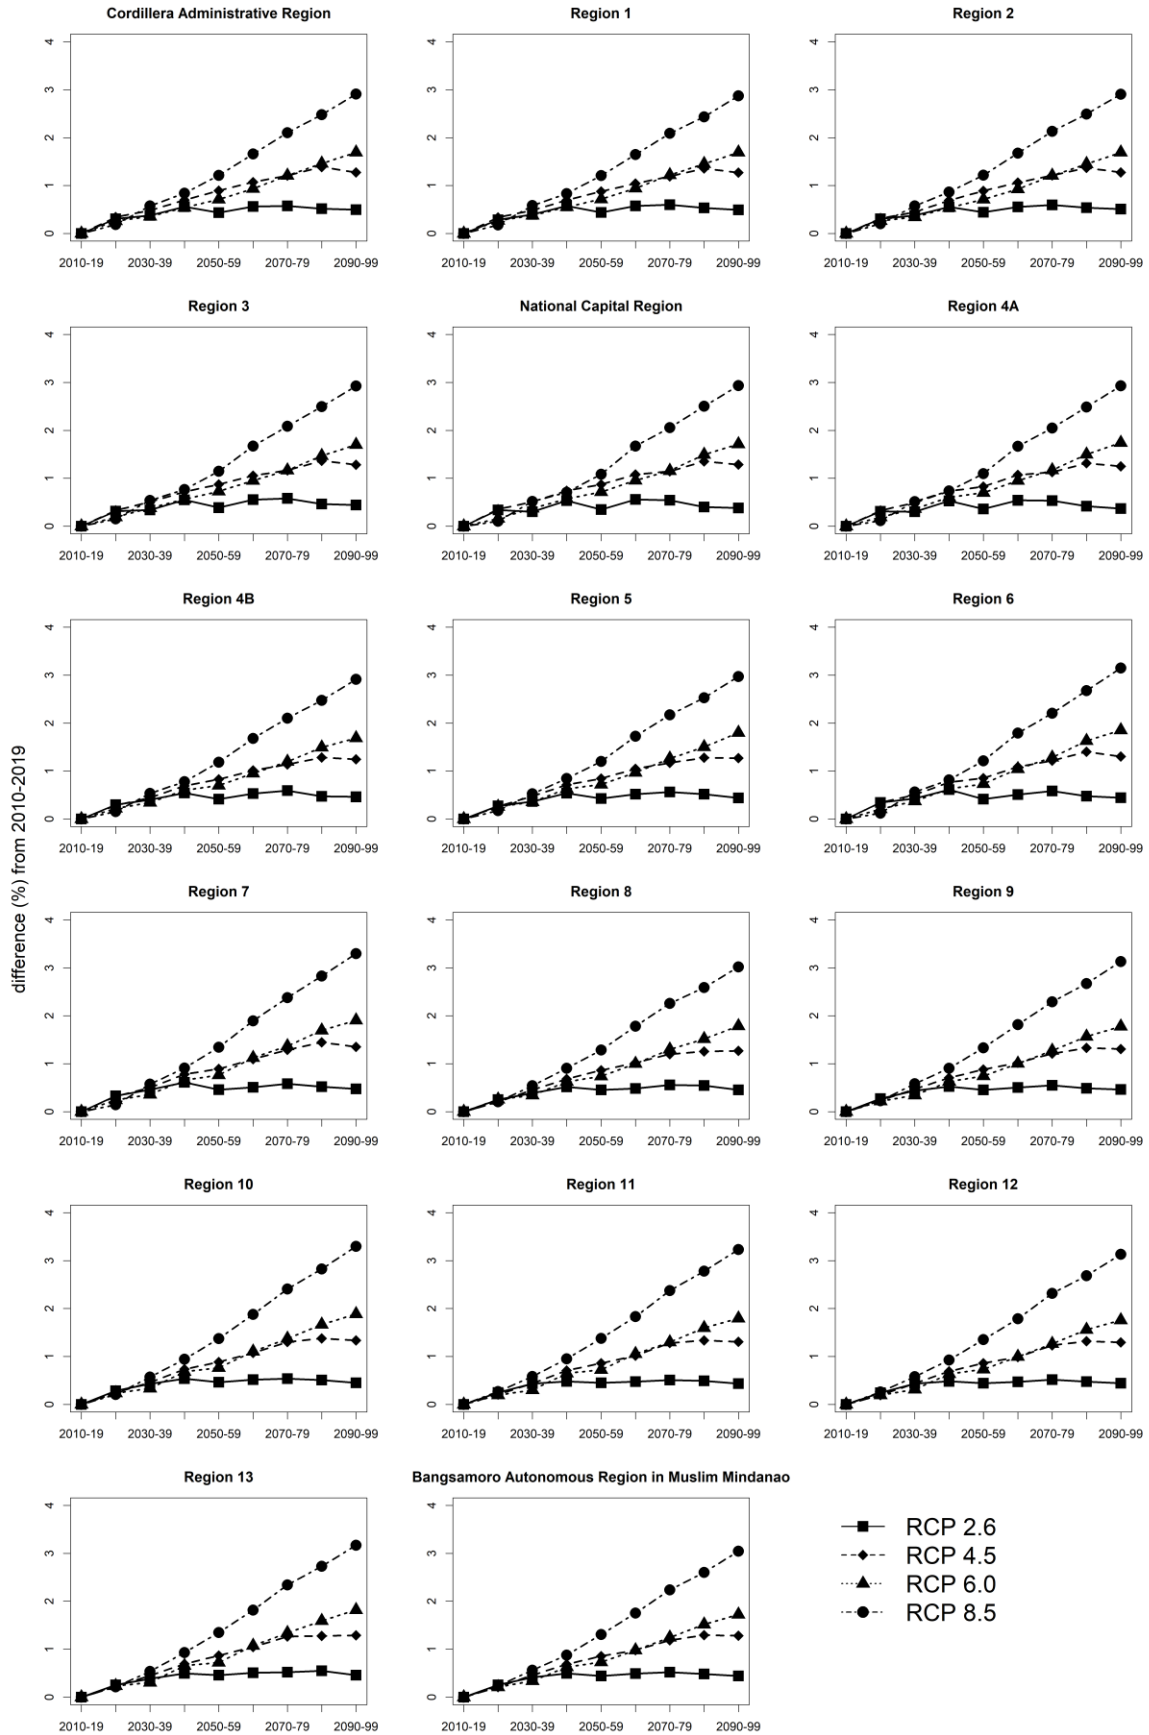

**Figure S6. Decadal temperature difference relative to 2010–2019 according to representative concentration pathways (RCPs) shown by Philippine region.**

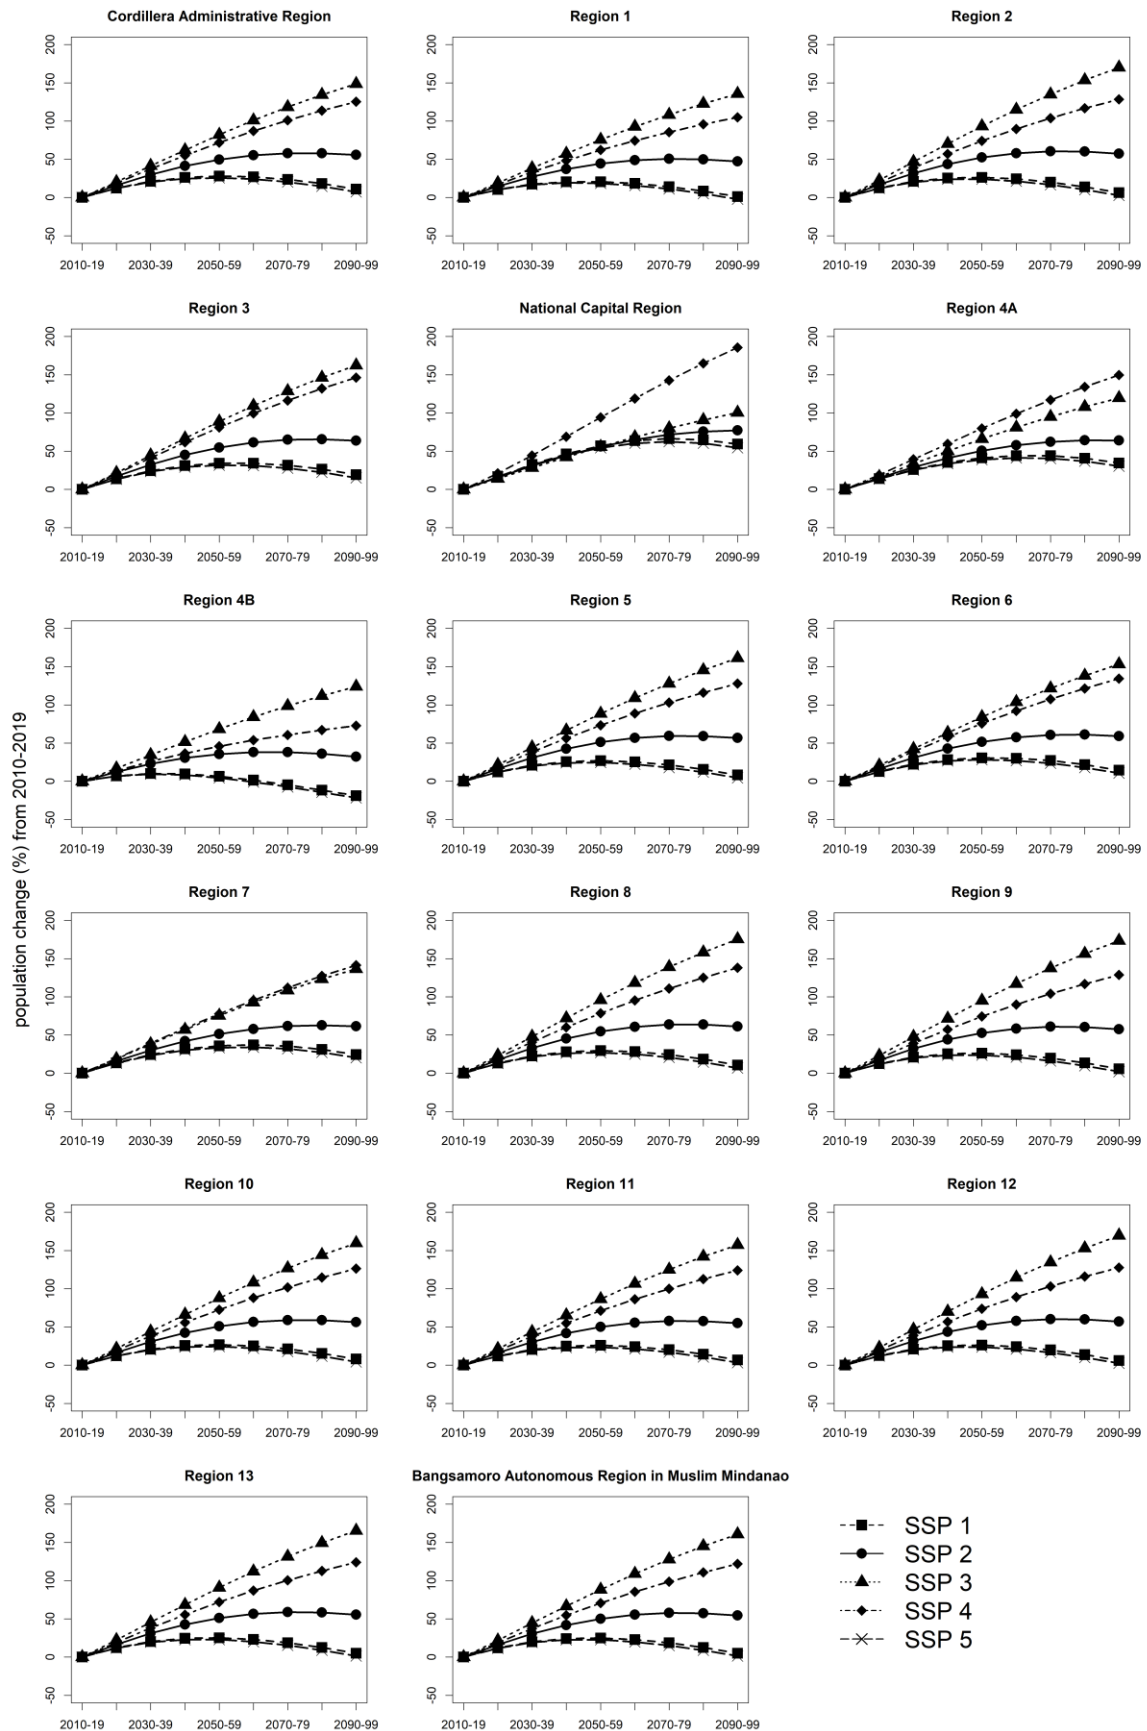

**Figure S7. Decadal population difference relative to 2010–2019 according to shared socioeconomic pathways (SSPs) shown by Philippine region.**



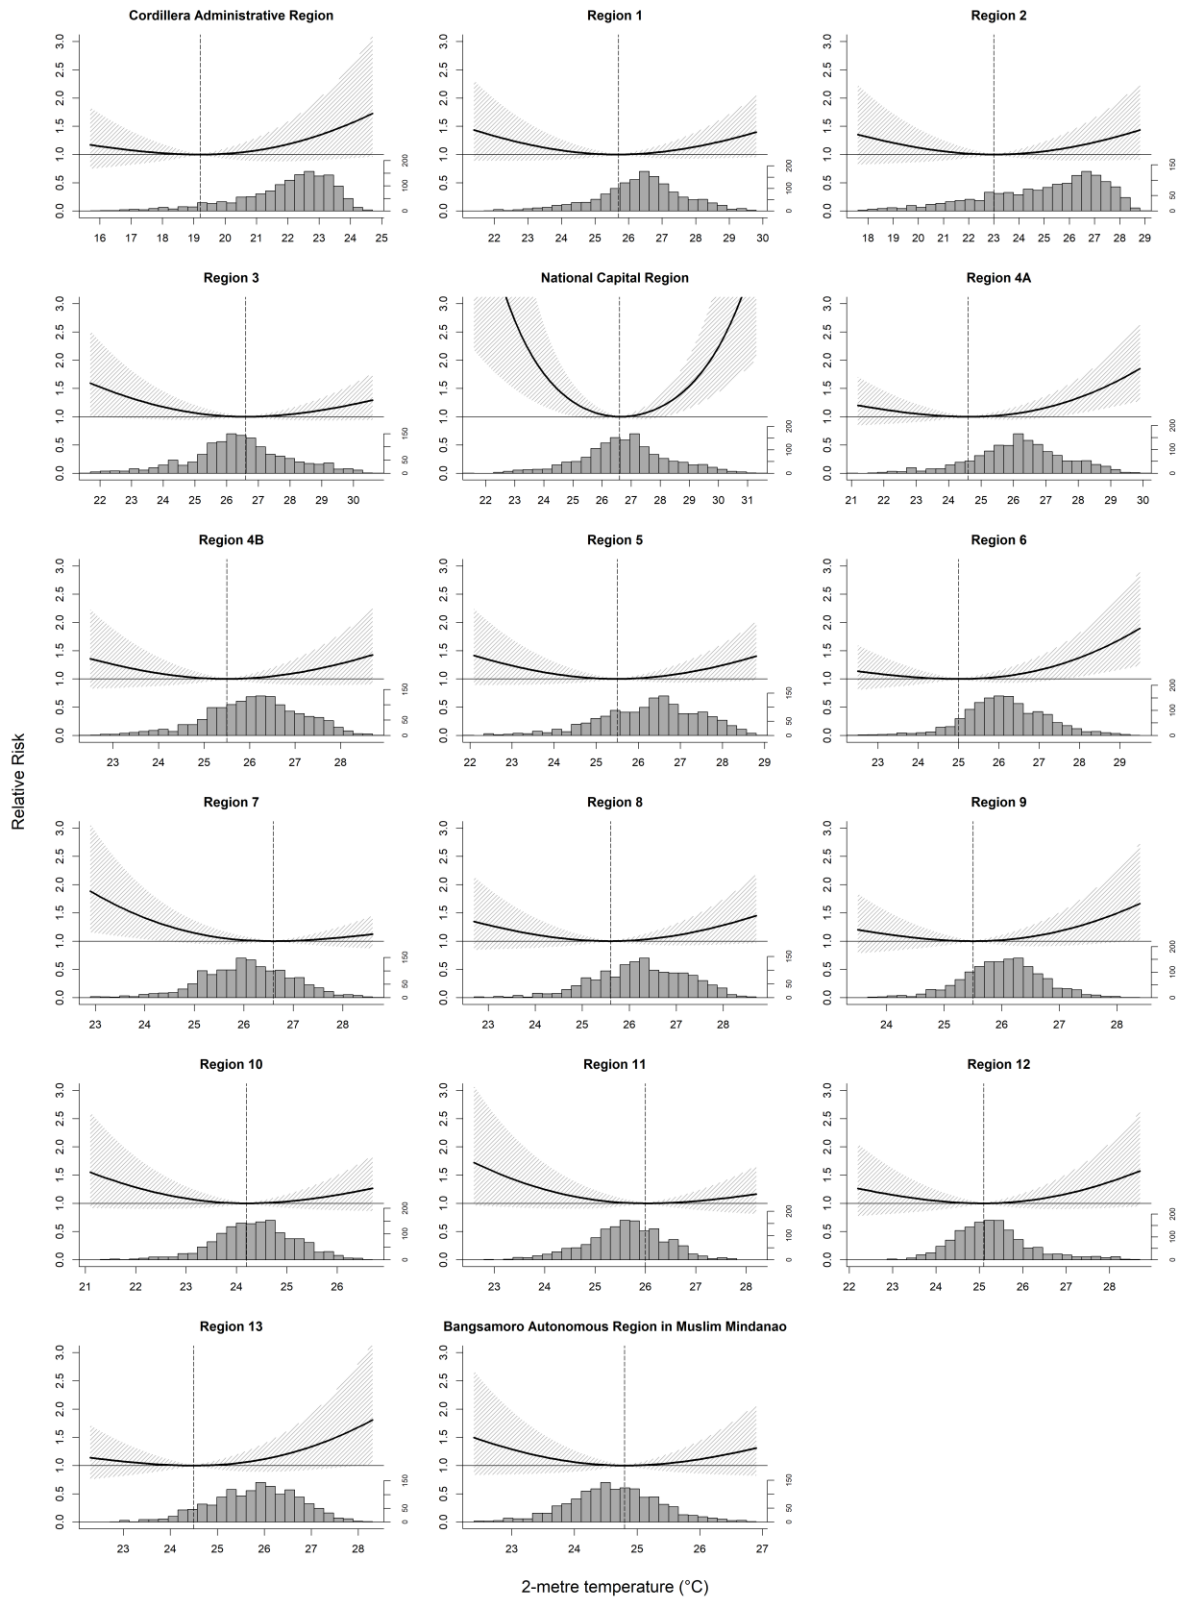

**Figure S8. Cumulative temperature–enteric infection mortality associations by Philippine region in 2014–2017.** Solid lines refer to mean relative risks, dashed lines refer to minimum risk temperatures, shaded regions refer to 95% empirical confidence intervals, and grey histograms refer to distribution of daily temperatures.

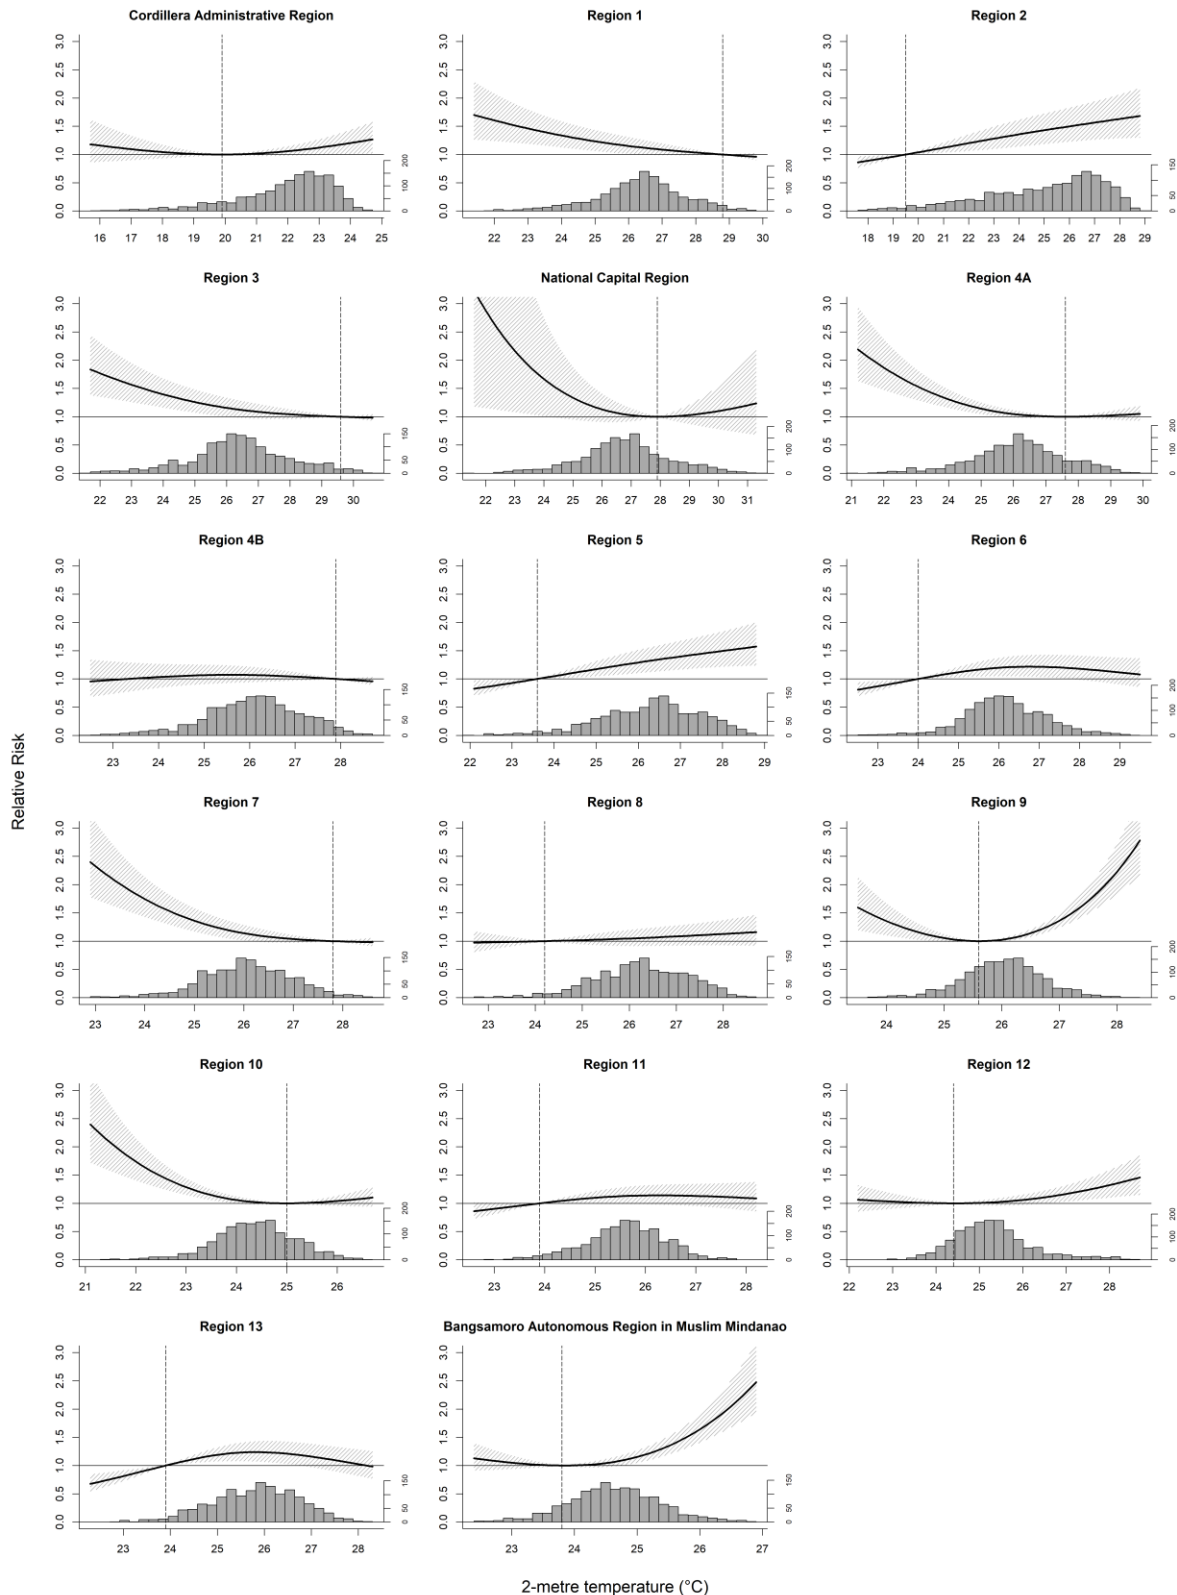

**Figure S9. Cumulative temperature–enteric infection hospital admissions associations by Philippine region in 2014–2017.** Solid lines refer to mean relative risks, dashed lines refer to minimum risk temperatures, shaded regions refer to 95% empirical confidence intervals, and grey histograms refer to distribution of daily temperatures.

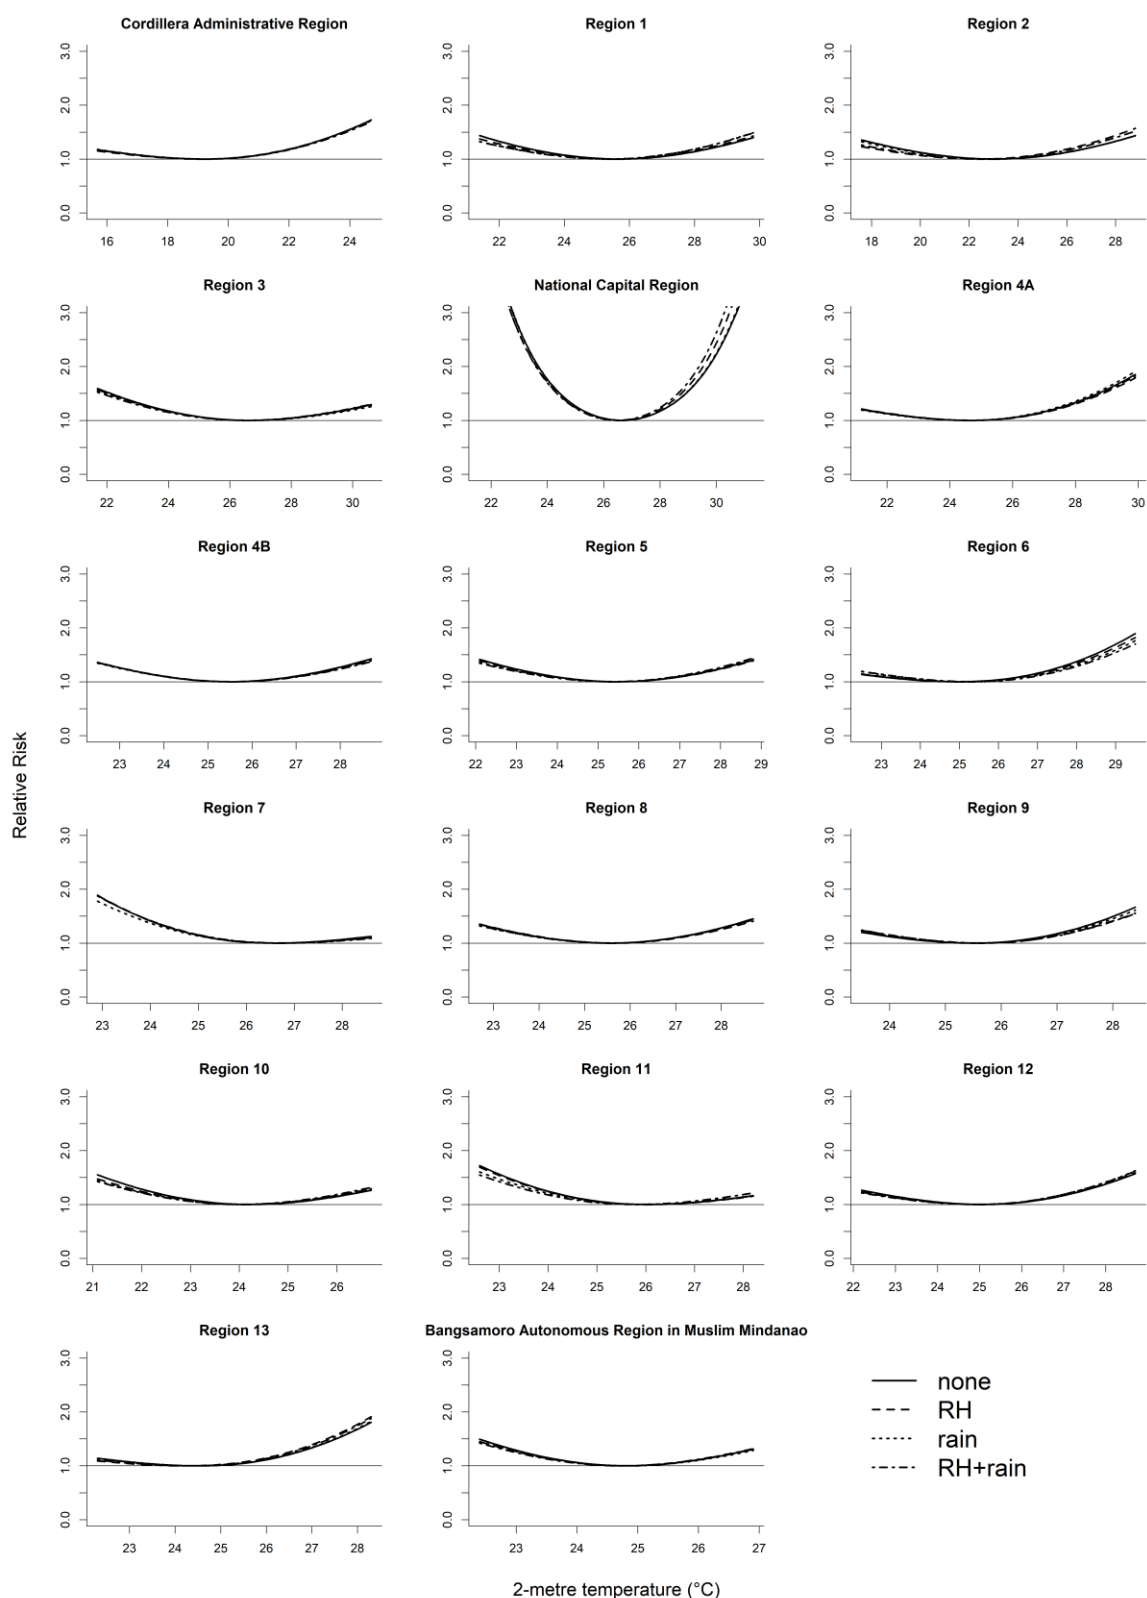

**Figure S10. Regional cumulative temperature–enteric infection mortality associations for 2014–2017 adjusting to confounders (sensitivity analysis).**  
 RH=relative humidity; rain=total precipitation

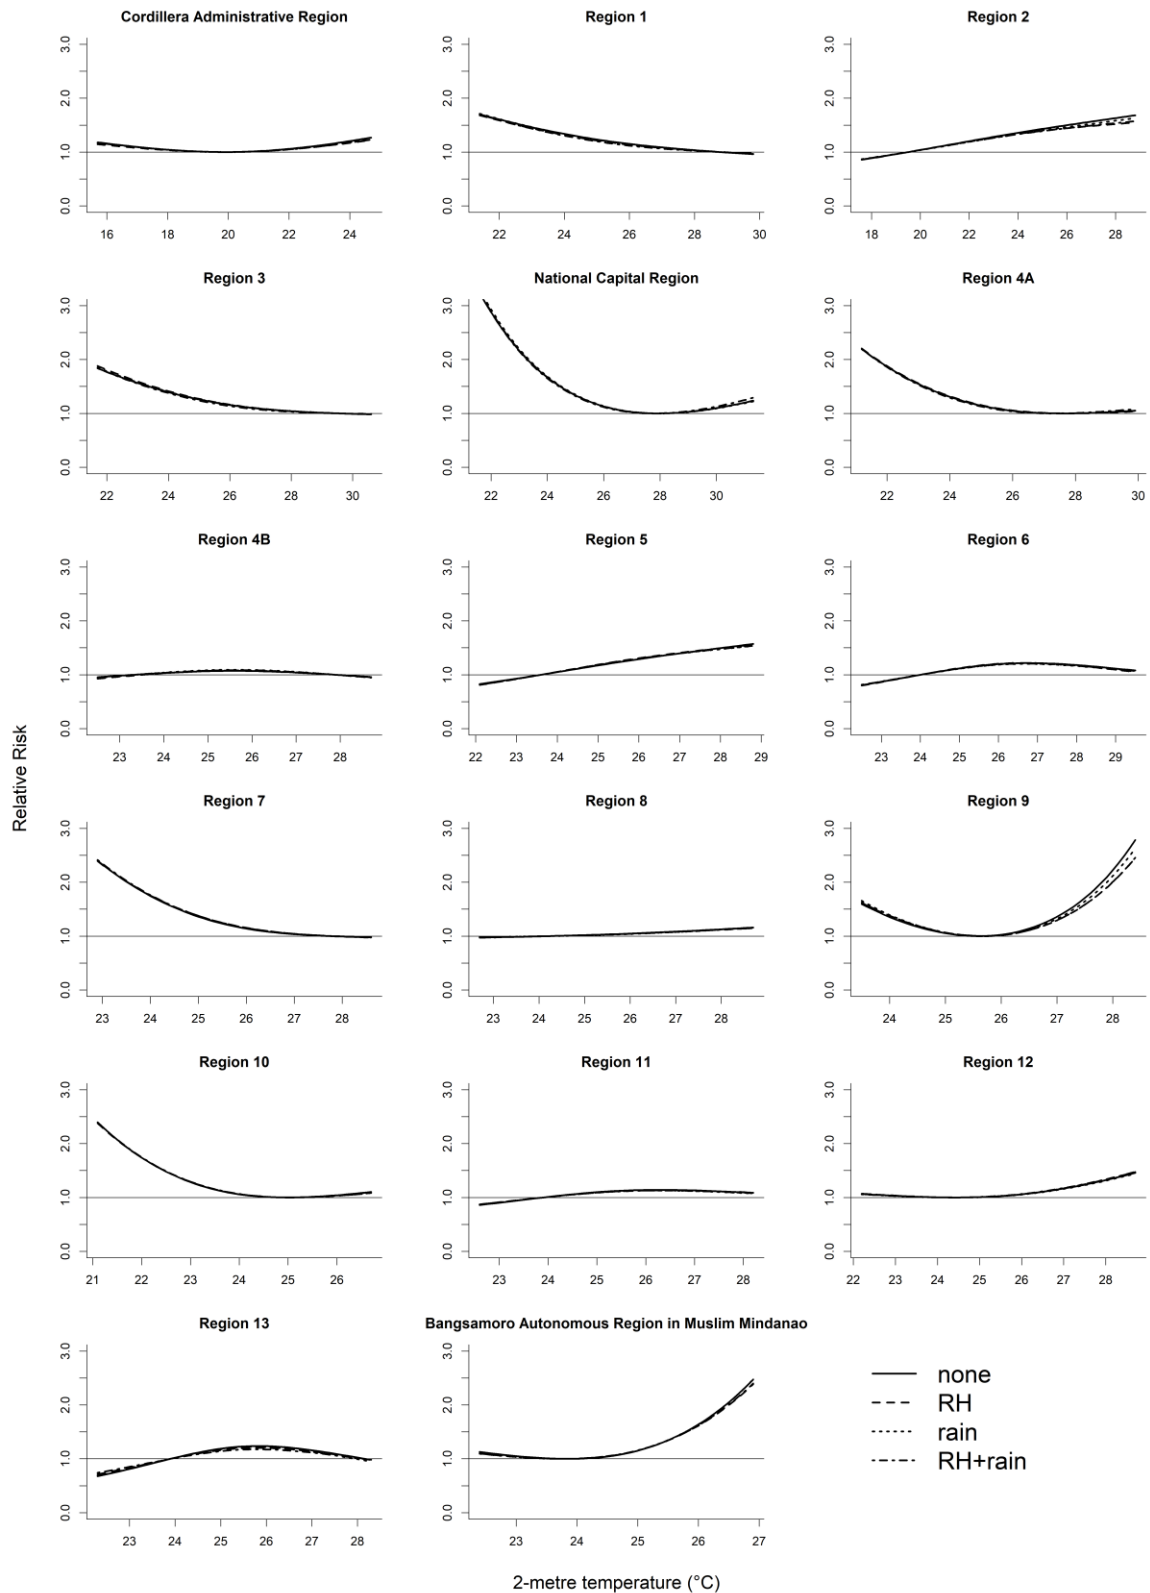

**Figure S11. Regional cumulative temperature–enteric infection hospital admissions associations for 2014–2017 adjusting to confounders (sensitivity analysis).**  
 RH=relative humidity; rain=total precipitation

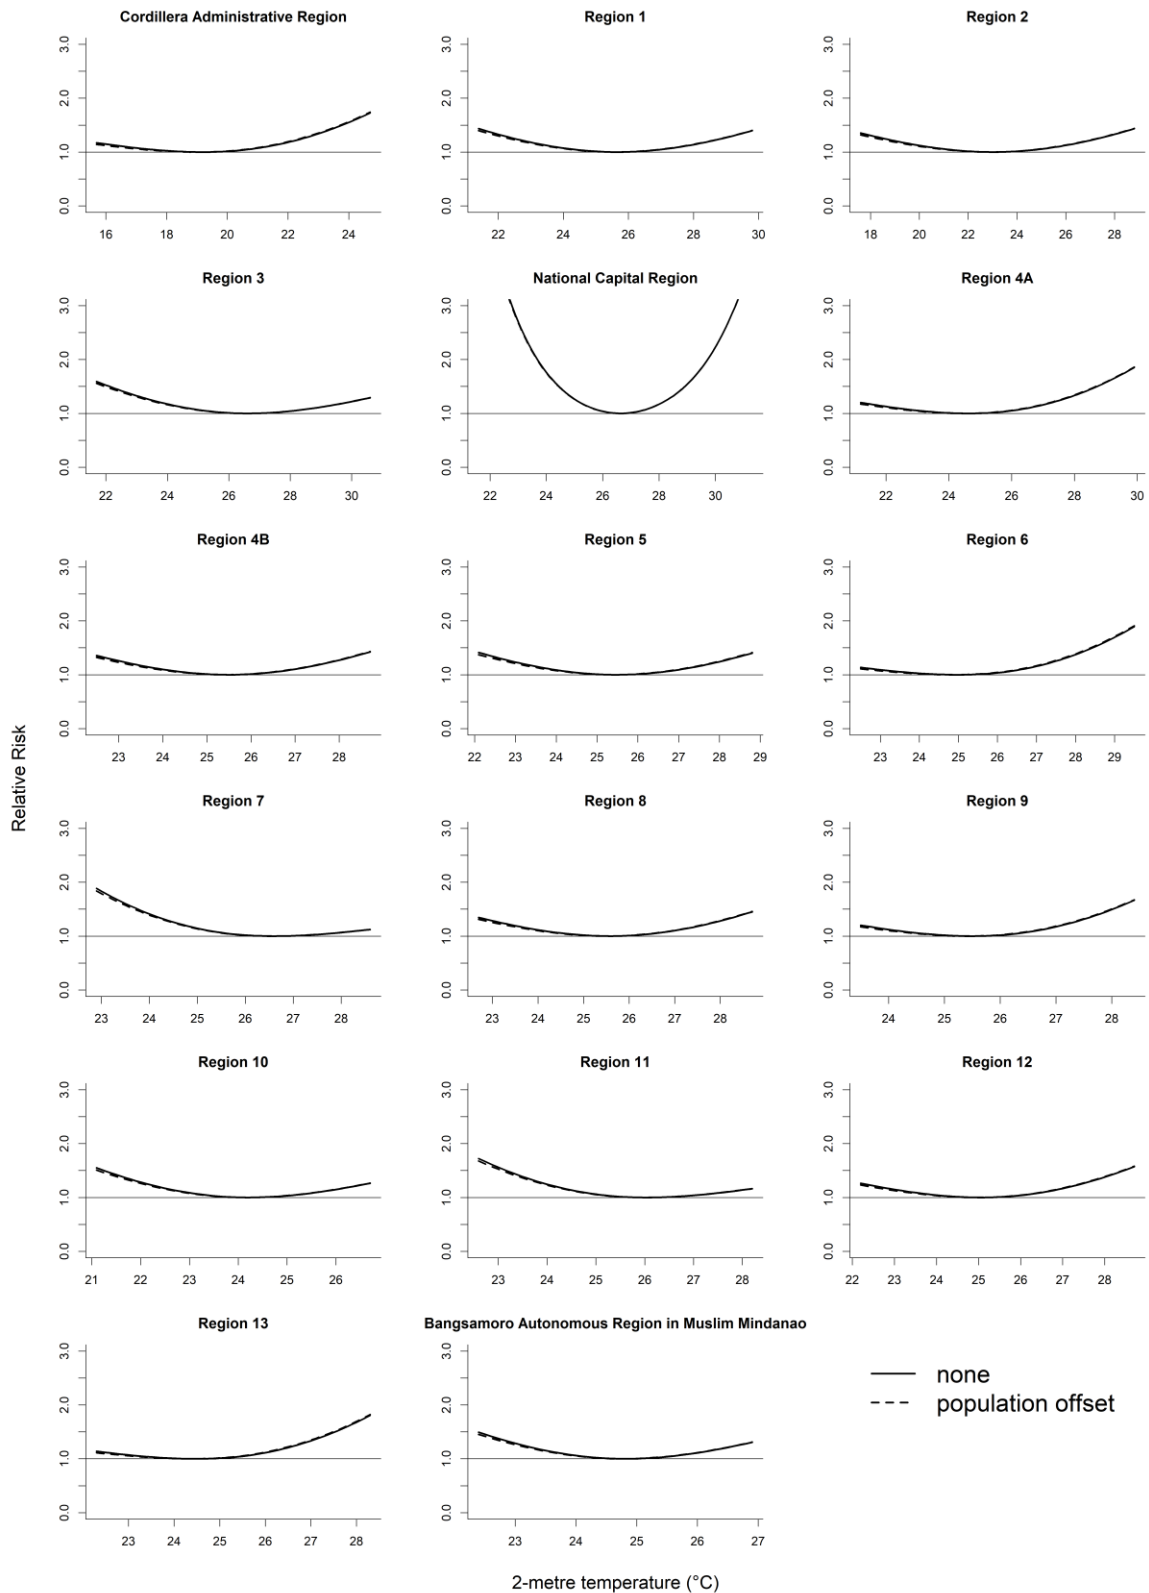

**Figure S12. Regional cumulative temperature–enteric infection mortality associations for 2014–2017 with population as offset (sensitivity analysis).**

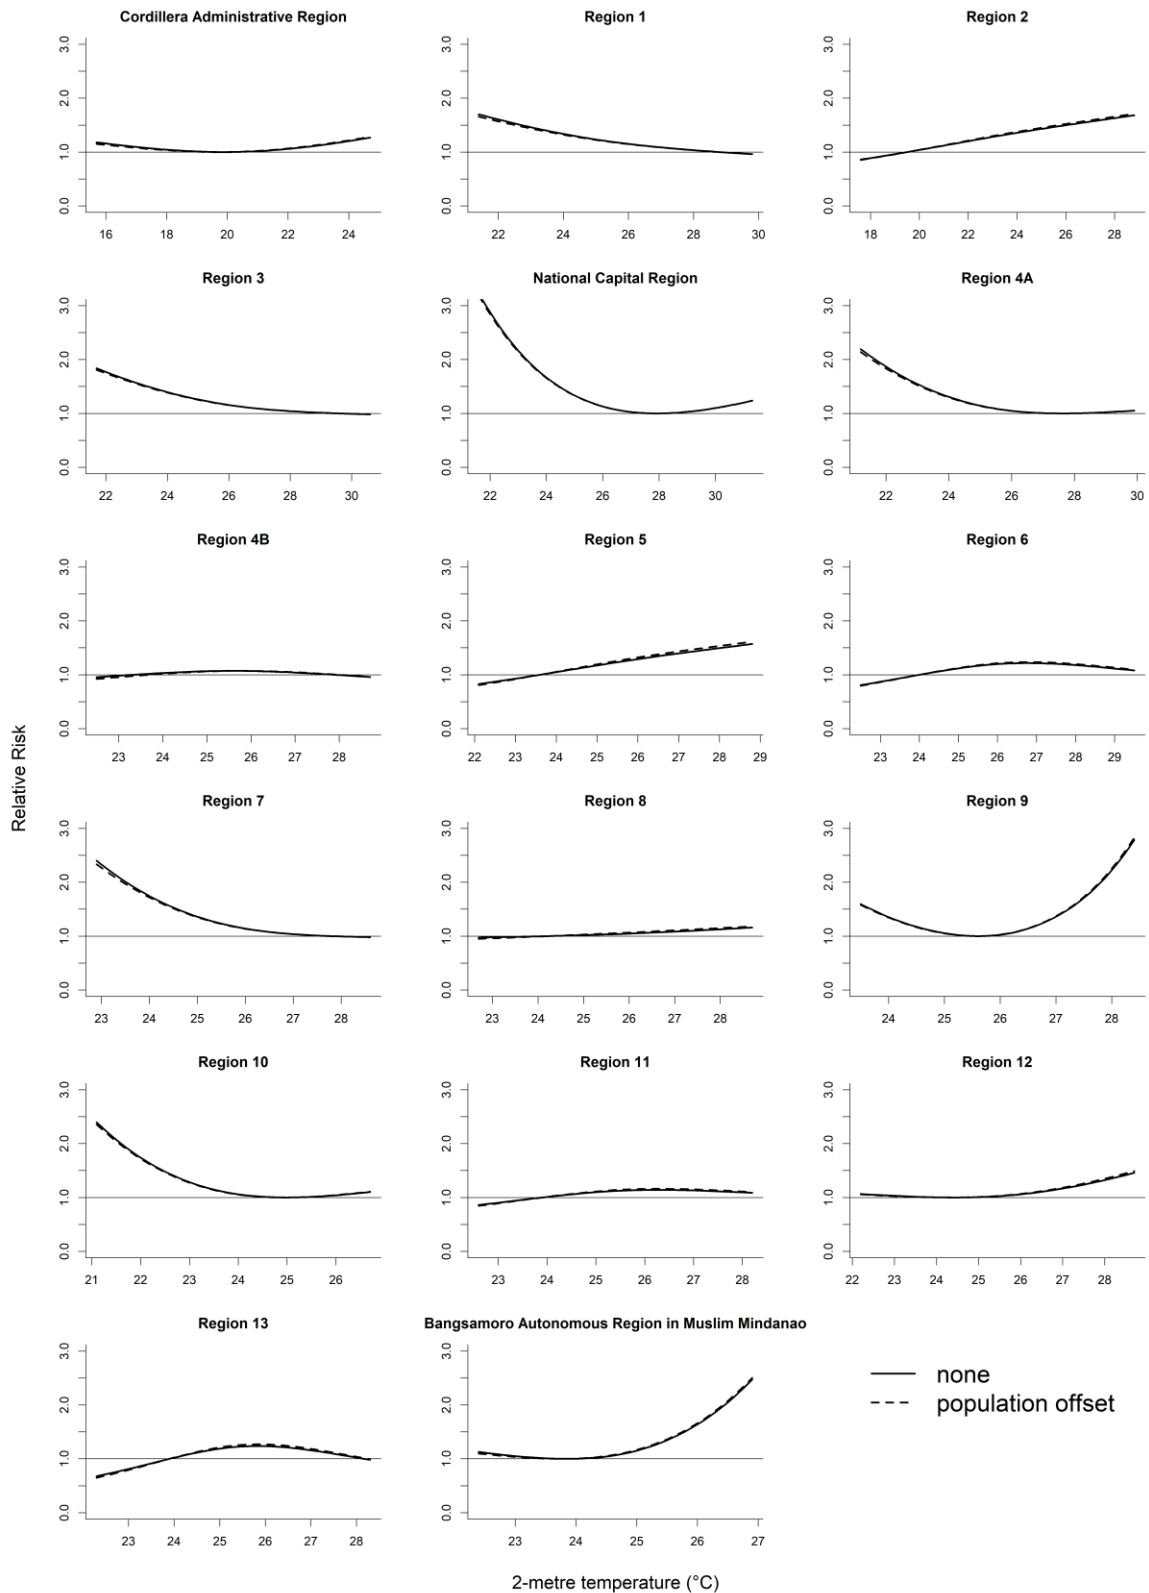

**Figure S13. Regional cumulative temperature–enteric infection hospital admission associations for 2014–2017 with population as offset (sensitivity analysis).**

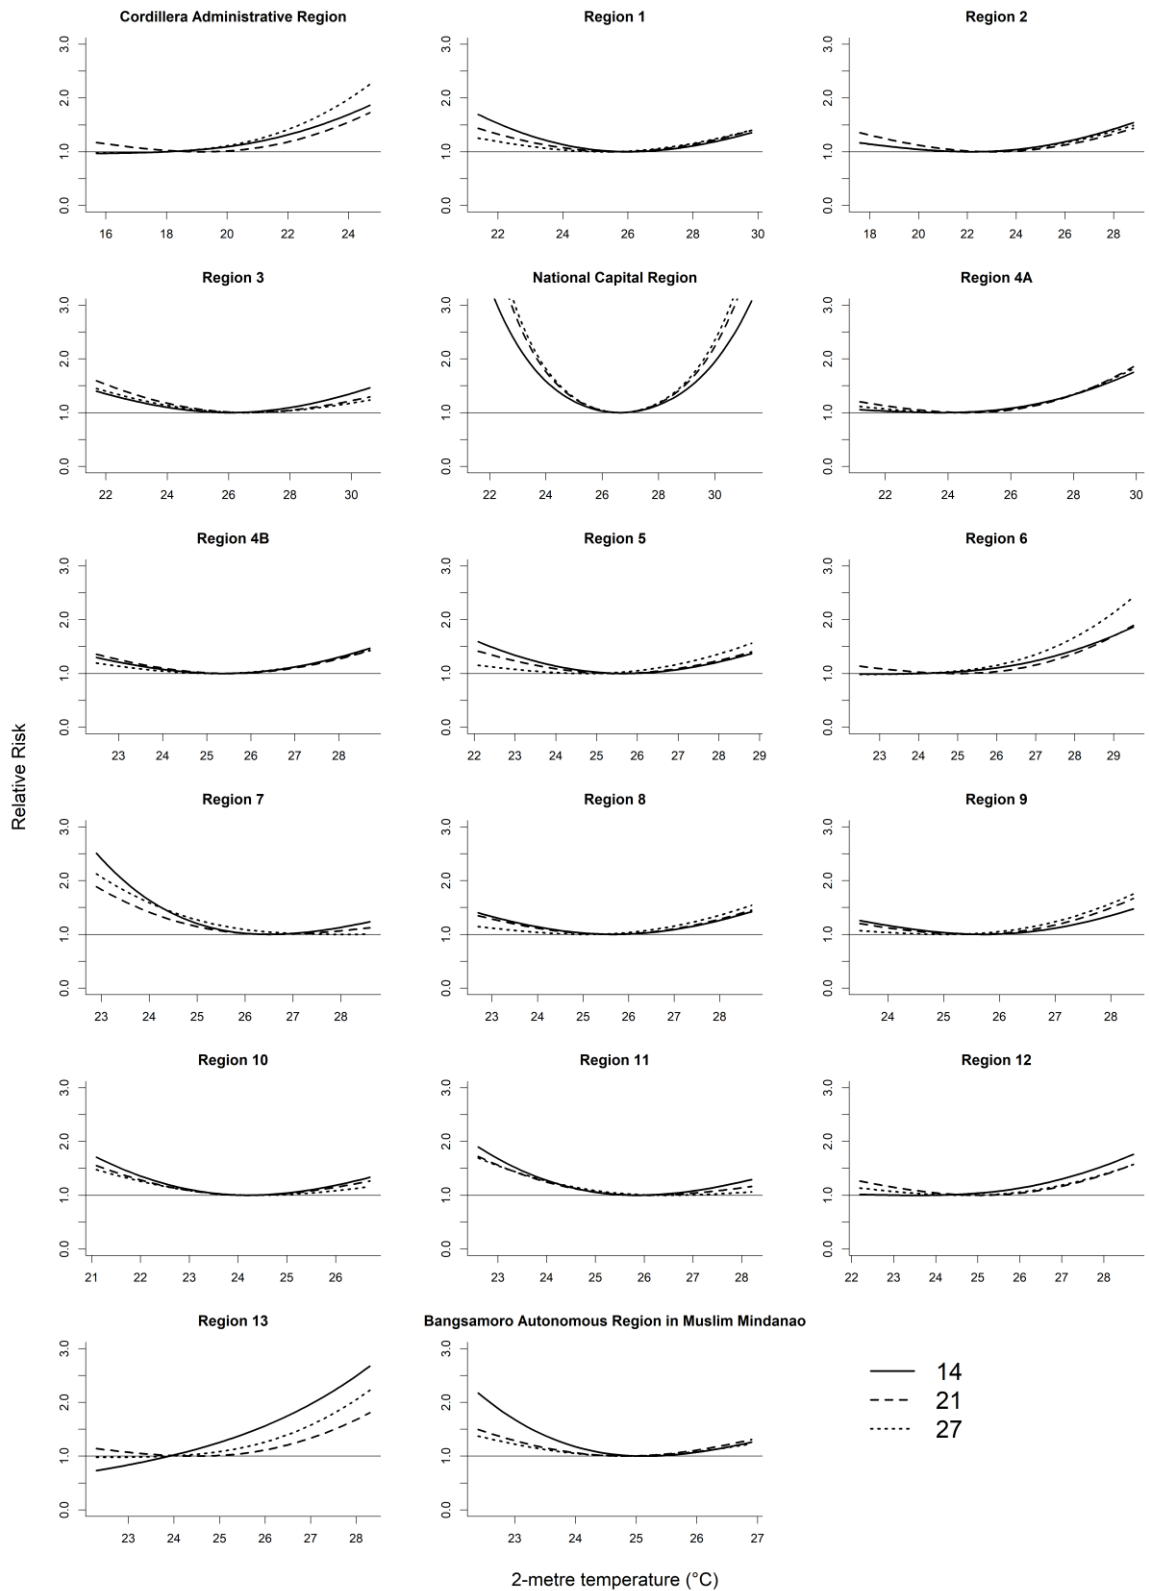

**Figure S14. Regional cumulative temperature–enteric infection mortality associations for 2014–2017 changing maximum lag days (sensitivity analysis)**

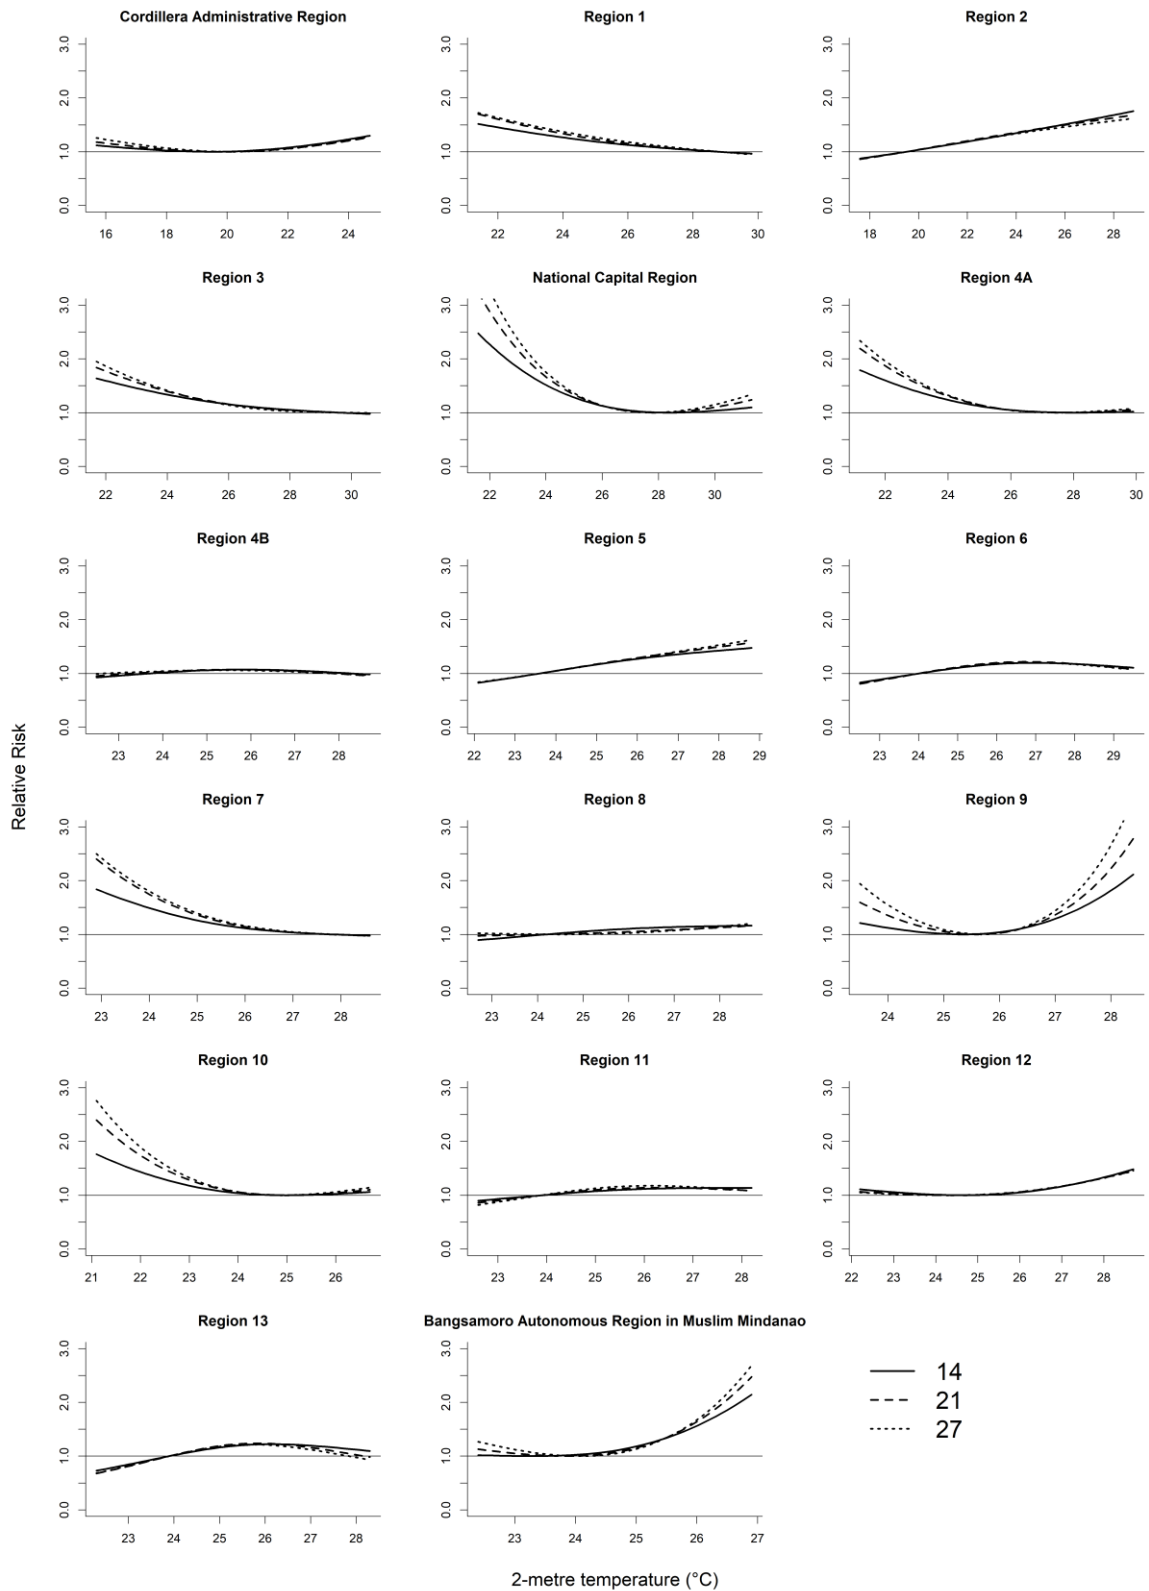

**Figure S15. Regional cumulative temperature–enteric infection hospital admissions associations for 2014–2017 changing maximum lag days (sensitivity analysis)**



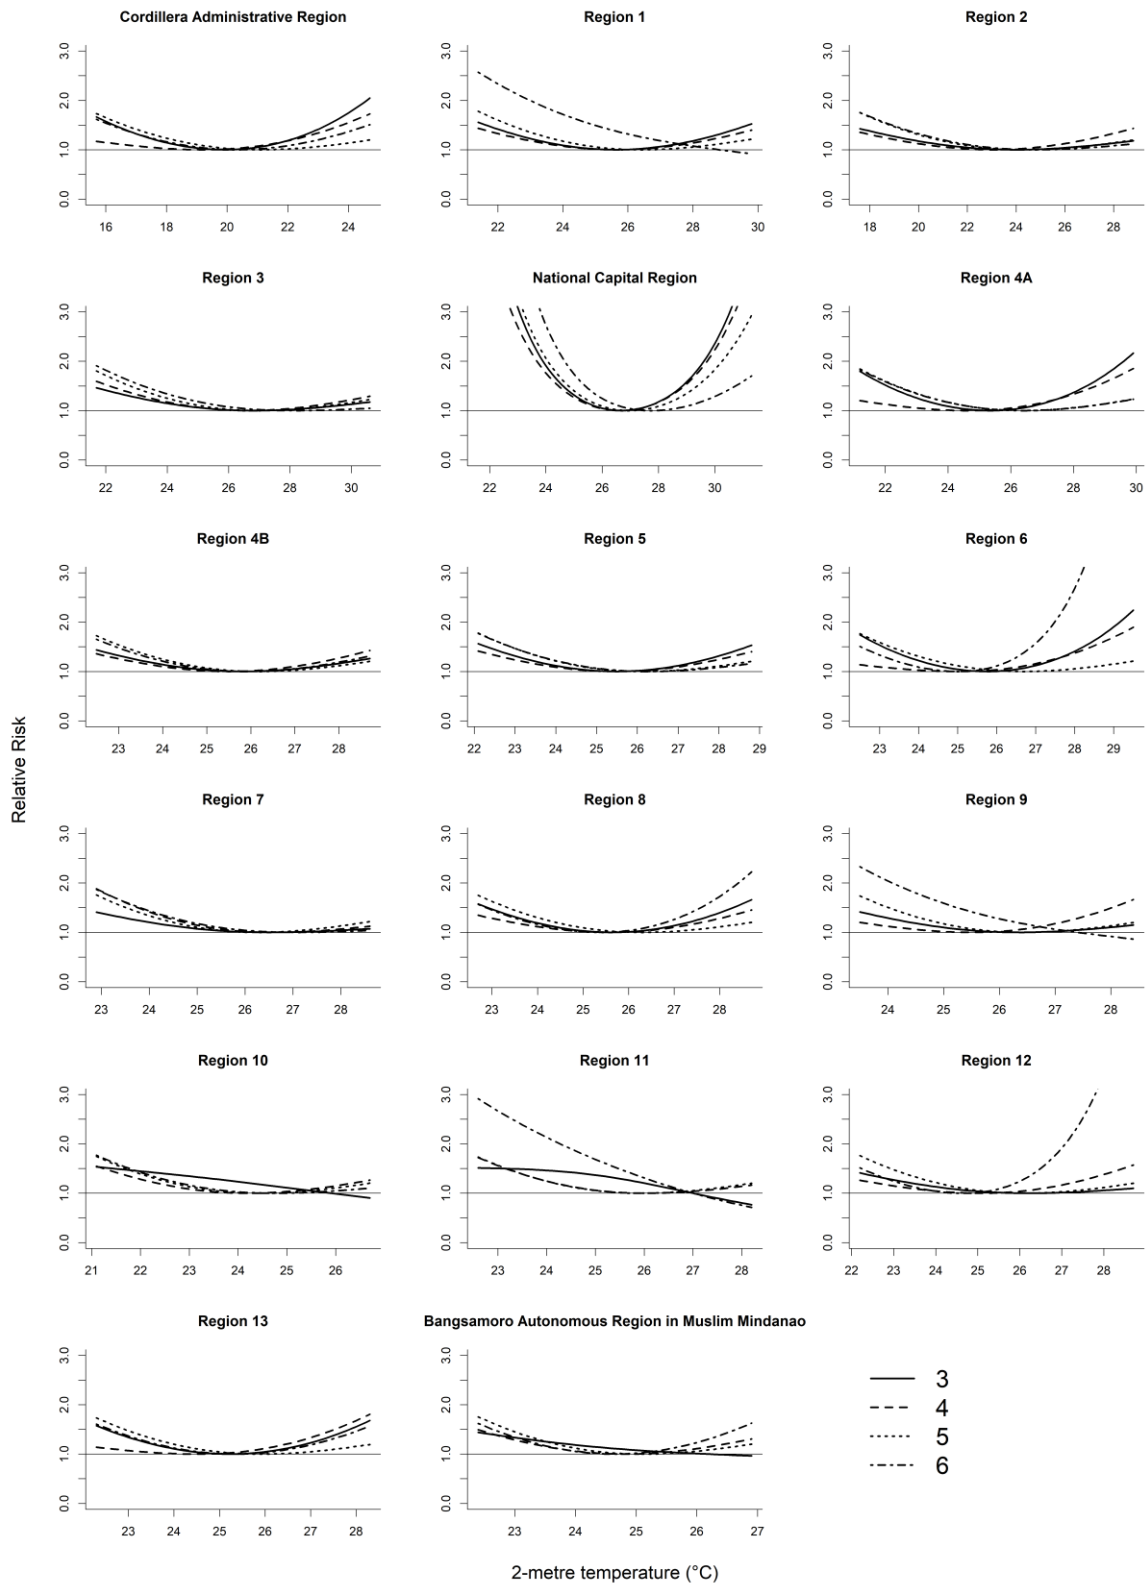

**Figure S16. Regional cumulative temperature–enteric infection mortality associations for 2014–2017 changing degrees of freedom for time or day (sensitivity analysis)**

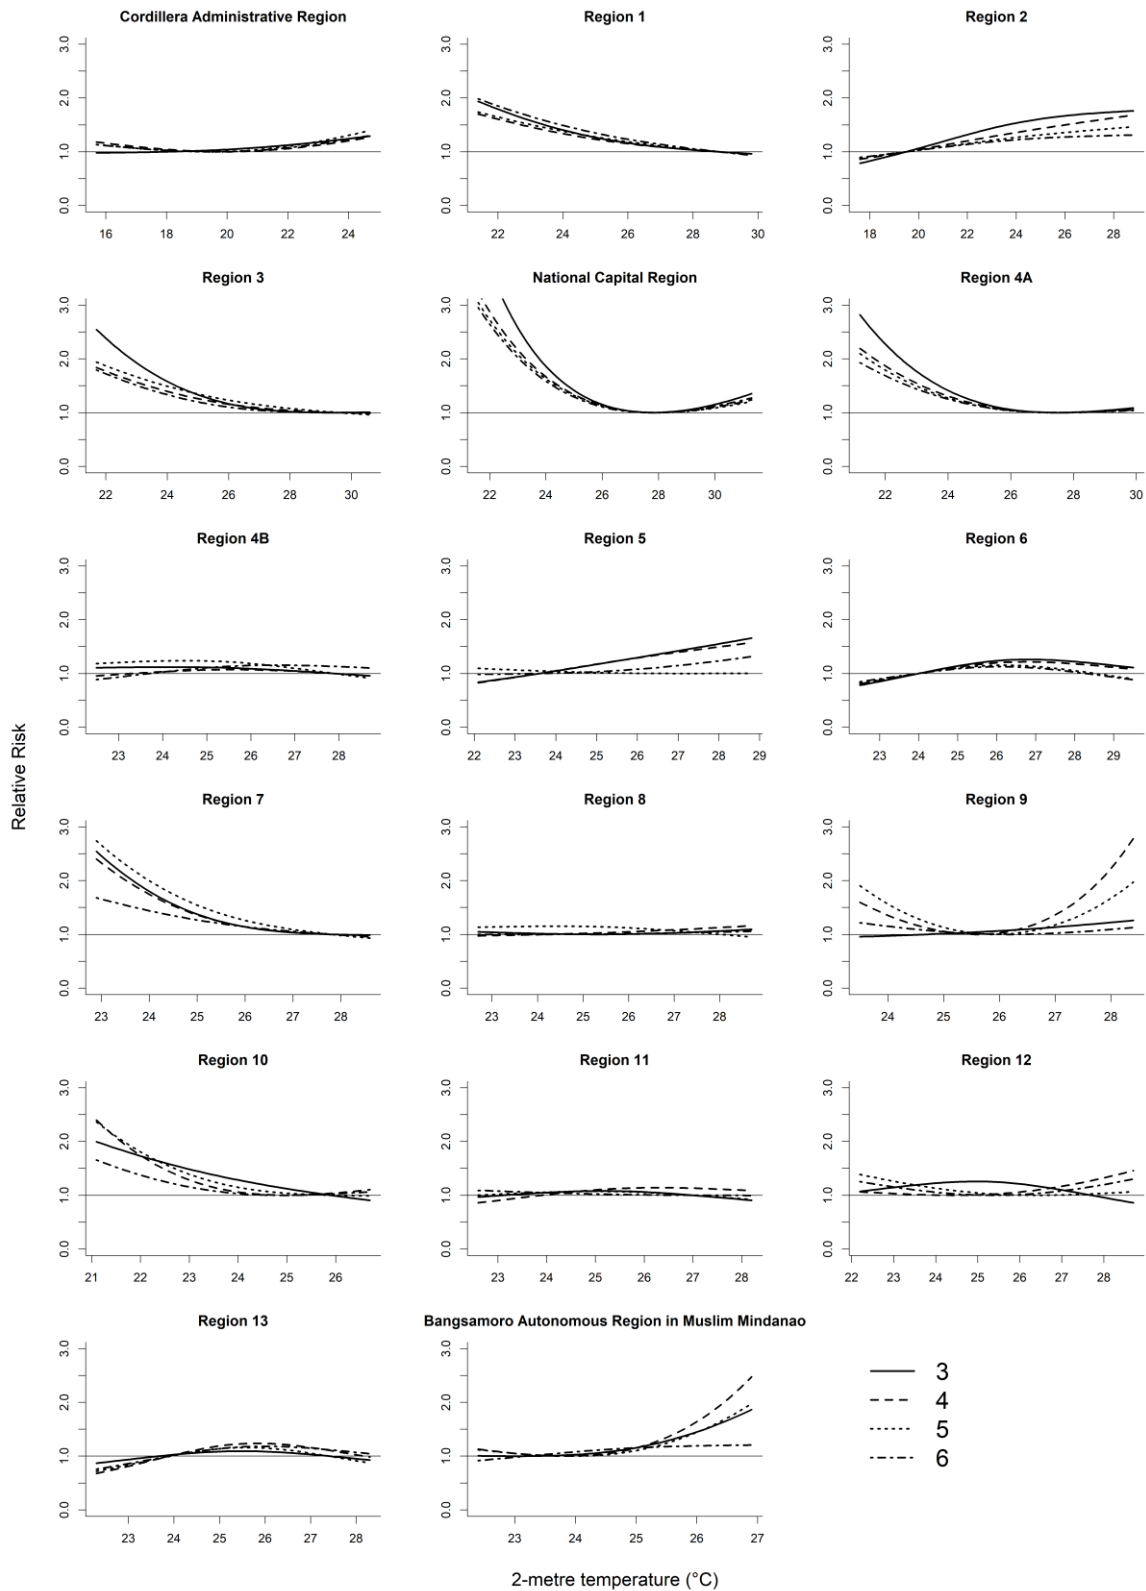

**Figure S17. Regional cumulative temperature–enteric infection hospital admissions for 2014–2017 associations changing degrees of freedom for time or day (sensitivity analysis)**

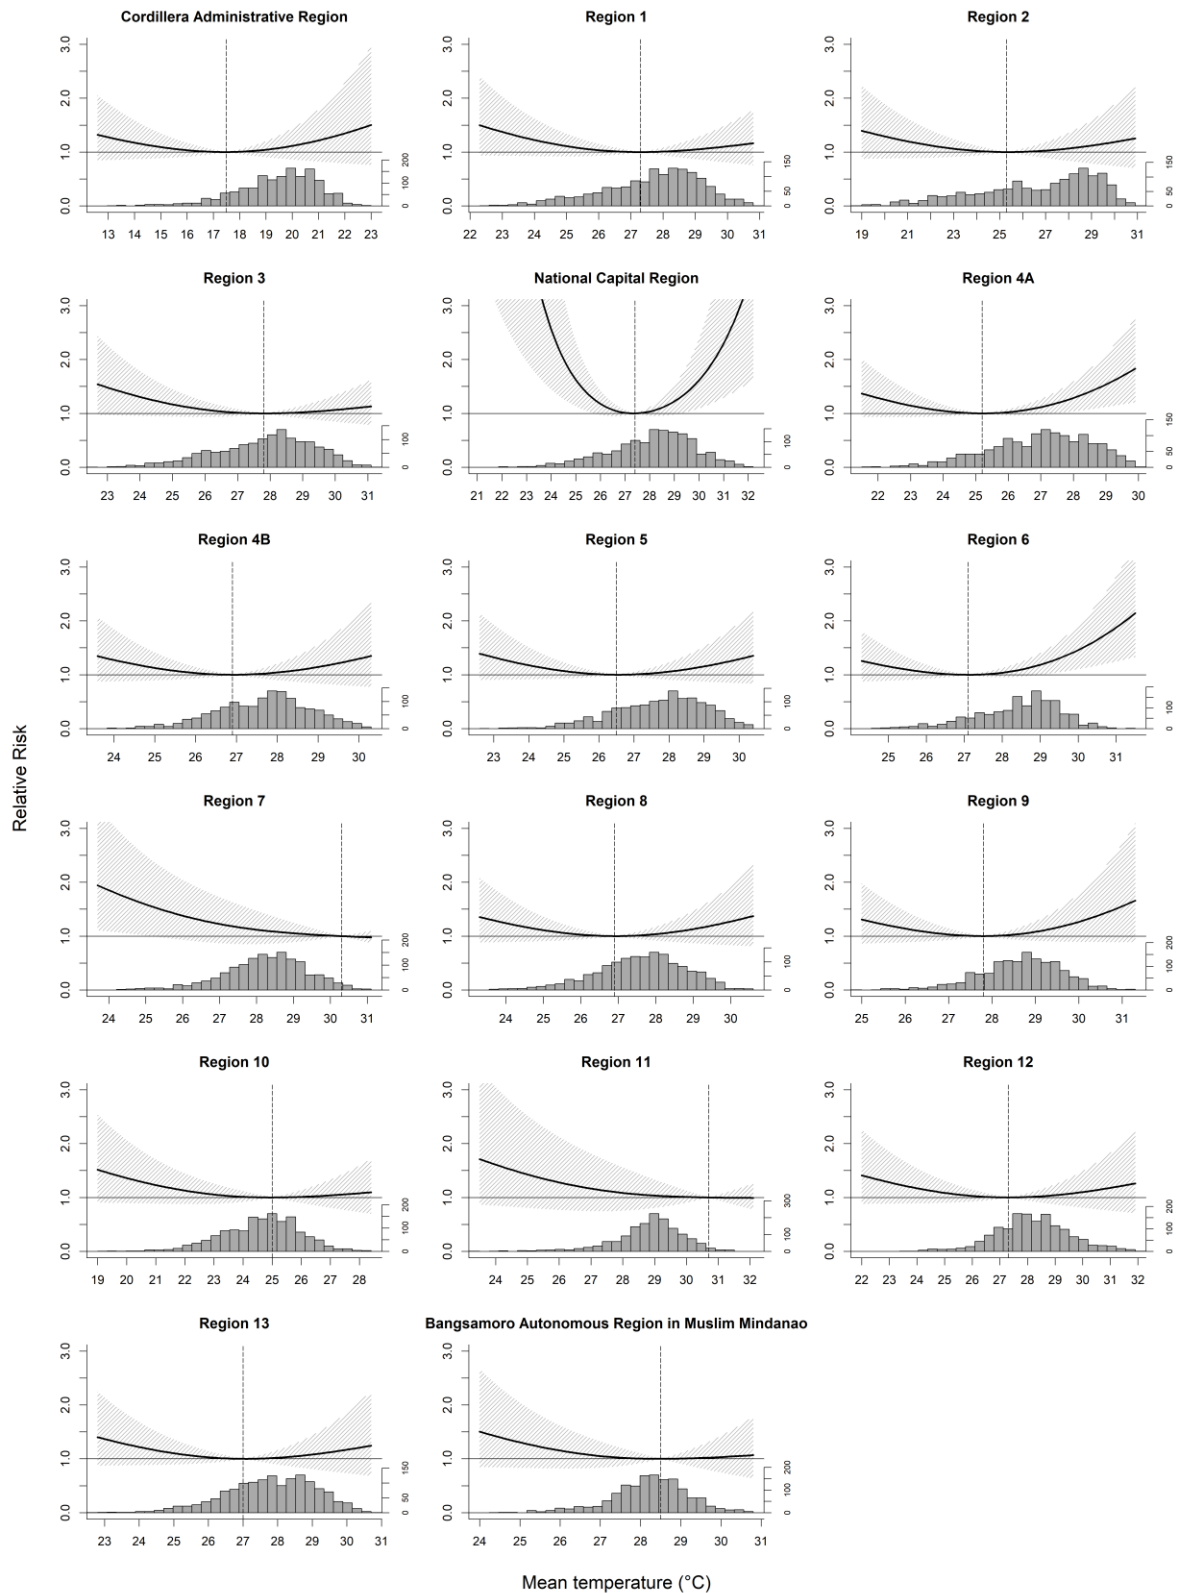

**Figure S18. Regional cumulative temperature–enteric infection mortality associations using weather stations daily mean temperatures for 2014–2017 (sensitivity analysis).** Solid lines refer to mean relative risks, dashed lines refer to minimum risk temperatures, shaded regions refer to 95% empirical confidence intervals, and grey histograms refer to distribution of daily temperatures.

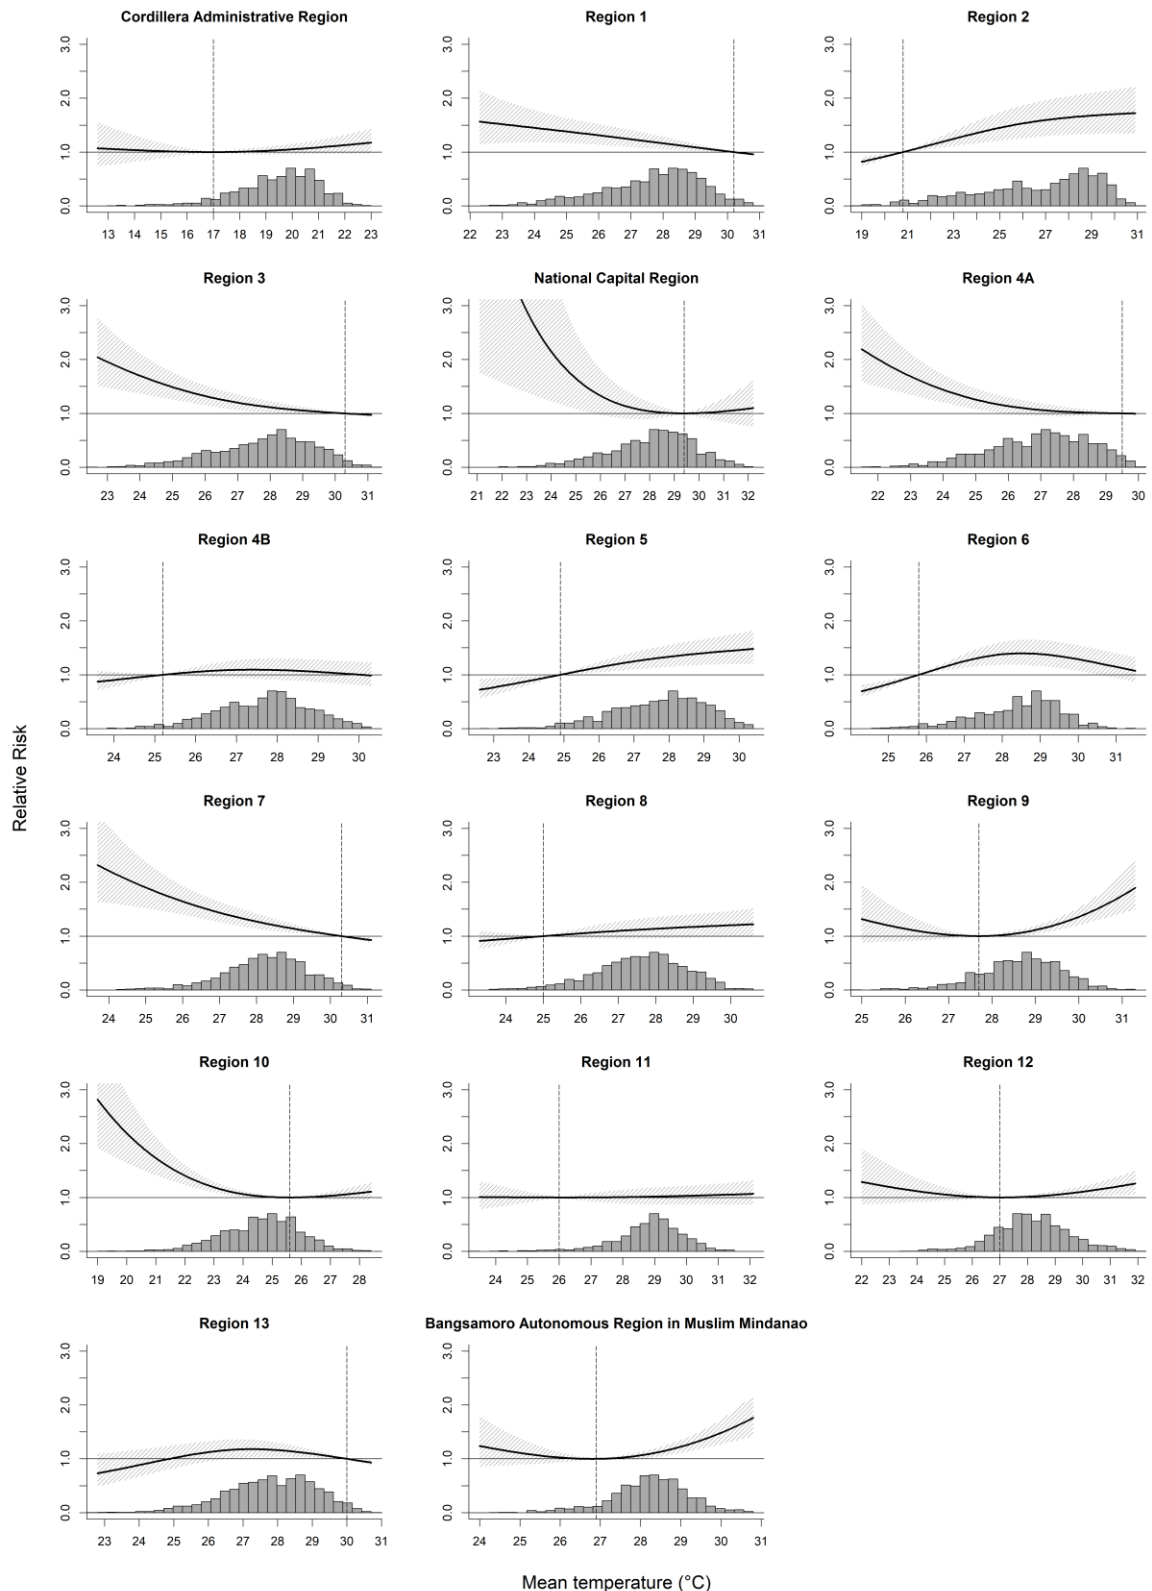

**Figure S19. Regional cumulative temperature–enteric infection hospital admission associations using weather stations daily mean temperatures for 2014–2017 (sensitivity analysis).** Solid lines refer to mean relative risks, dashed lines refer to minimum risk temperatures, shaded regions refer to 95% empirical confidence intervals, and grey histograms refer to distribution of daily temperatures.

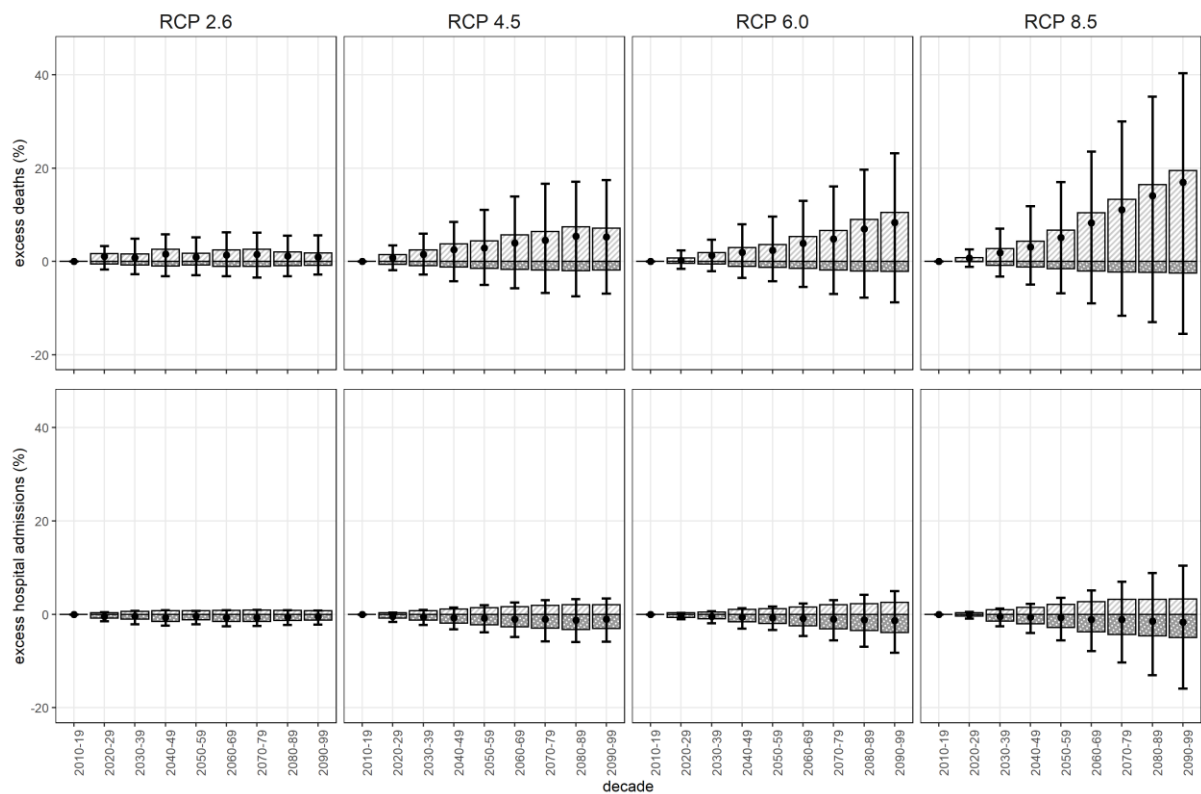

**Figure S20. General circulation model-ensemble temperature-attributable fractions of enteric infections relative to 2010–2019 by outcome in the Philippines using weather stations data (sensitivity analysis).** Striped bars refer to high temperature-attributable enteric infections, dotted bars refer to low temperature-attributable enteric infections, black circles refer to total temperature-attributable enteric infections, and error bars refer to 95%eCI.
