# Supplementary material
Source: PubMed Central journal article supplement (PMC8860302)
Supplement: ehp9324.smcontents.508.pdf [file ehp9324.smcontents.508.pdf]

**Note to readers with disabilities:** *EHP* strives to ensure that all journal content is accessible to all readers. However, some figures and Supplemental Material published in *EHP* articles may not conform to [508 standards](#) due to the complexity of the information being presented. If you need assistance accessing journal content, please contact [ehp508@niehs.nih.gov](mailto:ehp508@niehs.nih.gov). Our staff will work with you to assess and meet your accessibility needs within 3 working days.

### **Supplemental Material**

#### **Projecting Temperature-Attributable Mortality and Hospital Admissions due to Enteric Infections in the Philippines**

Paul L.C. Chua, Chris Fook Sheng Ng, Lina Madaniyazi, Xerxes Seposo, Miguel Antonio Salazar, Veronika Huber, and Masahiro Hashizume

#### **Table of Contents**

**Table S1.** Regional sociodemographic profiles.

**Table S2.** Number and proportion of etiologies of mortality due to enteric infections by Philippine region in 2014–2017.

**Table S3.** Number and proportion of etiologies of hospital admissions due to enteric infections by Philippine region in 2014–2017.

**Table S4.** Number and proportion of mortality due to enteric infections by Philippine region and age-groups in 2014–2017.

**Table S5.** Number and proportion of hospital admissions due to enteric infections by Philippine region and age-groups in 2014–2017.

**Table S6.** Number and proportion of physician-attended and unattended mortality due to enteric infections by Philippine region in 2014–2017.

**Table S7.** Philippine-level projected general circulation model-ensemble mean temperatures by Representative Concentration Pathways (RCPs) and decade based on the Inter-Sectoral Impact Model Intercomparison Project 2b.

**Table S8.** Philippine-level projected mean annual population in millions by Shared Socioeconomic Pathways (SSPs) and decade based on the Inter-Sectoral Impact Model Intercomparison Project 2b.

**Table S9.** Heterogeneity of multivariate meta-regression models for Philippine temperature–enteric infection associations in 2014–2017.

**Table S10.** Relative risks of cumulative 2-metre temperature–enteric infections associations by high and low temperatures relative to minimum risk temperatures in 2014–2017.

**Table S11.** Philippines-level temperature-attributable fractions of deaths due to enteric infections relative to 2010–2019 with no population change by Representative Concentration Pathway (RCP) scenarios, temperature range, and decade.

**Table S12.** Philippines-level temperature-attributable fractions of hospital admissions due to enteric infections relative to 2010–2019 with no population change by Representative Concentration Pathway (RCP) scenarios, temperature range, and decade.

**Table S13.** Regional temperature-attributable fractions of deaths and hospital admissions due to enteric infections in 2090–2099 relative to 2010–2019 by representative concentration pathways and no population change.

**Table S14.** Regional temperature-attributable numbers of deaths and hospital admissions due to enteric infections in 2090–2099 relative to 2010–2019 by representative concentration pathways and no population change.

**Table S15.** Regional temperature-attributable numbers of deaths due to enteric infections in 2090–2099 relative to 2010–2019 by representative concentration pathways and shared socioeconomic pathways.

**Table S16.** Regional temperature-attributable numbers of hospital admissions due to enteric infections in 2090–2099 relative to 2010–2019 by representative concentration pathways and shared socioeconomic pathways.

**Figure S1.** Philippine administrative regions.

**Figure S2.** Annual deaths and hospital admissions due to enteric infections in the Philippines in 2006–2018.

**Figure S3.** Average 2-meter temperatures per administrative region.

**Figure S4.** Weather stations in the Philippines. Black dots have imputable mean temperature data and white dots have more than 10% missing data.

**Figure S5.** Likely and unlikely combinations of Shared Socioeconomic Pathways (SSP) and Representative Concentration Pathways (RCP) expressed in radiative forcing.

**Figure S6.** Decadal temperature difference relative to 2010–2019 according to representative concentration pathways (RCPs) shown by Philippine region.

**Figure S7.** Decadal population difference relative to 2010–2019 according to shared socioeconomic pathways (SSPs) shown by Philippine region.

**Figure S8. Cumulative temperature–enteric infection mortality associations by Philippine region in 2014–2017.** Solid lines refer to mean relative risks, dashed lines refer to minimum risk temperatures, shaded regions refer to 95% empirical confidence intervals, and grey histograms refer to distribution of daily temperatures.

**Figure S9. Cumulative temperature–enteric infection hospital admissions associations by Philippine region in 2014–2017.** Solid lines refer to mean relative risks, dashed lines refer to minimum risk temperatures, shaded regions refer to 95% empirical confidence intervals, and grey histograms refer to distribution of daily temperatures.

**Figure S10.** Regional cumulative temperature–enteric infection mortality associations for 2014–2017 adjusting to confounders (sensitivity analysis).

**Figure S11.** Regional cumulative temperature–enteric infection hospital admissions associations for 2014–2017 adjusting to confounders (sensitivity analysis).

**Figure S12.** Regional cumulative temperature–enteric infection mortality associations for 2014–2017 with population as offset (sensitivity analysis).

**Figure S13.** Regional cumulative temperature–enteric infection hospital admission associations for 2014–2017 with population as offset (sensitivity analysis).

**Figure S14.** Regional cumulative temperature–enteric infection mortality associations for 2014–2017 changing maximum lag days (sensitivity analysis).

**Figure S15.** Regional cumulative temperature–enteric infection hospital admissions associations for 2014–2017 changing maximum lag days (sensitivity analysis).

**Figure S16.** Regional cumulative temperature–enteric infection mortality associations for 2014–2017 changing degrees of freedom for time or day (sensitivity analysis).

**Figure S17.** Regional cumulative temperature–enteric infection hospital admissions for 2014–2017 associations changing degrees of freedom for time or day (sensitivity analysis).

**Figure S18. Regional cumulative temperature–enteric infection mortality associations using weather stations daily mean temperatures for 2014–2017 (sensitivity analysis).** Solid lines refer to mean relative risks, dashed lines refer to minimum risk temperatures, shaded regions refer to 95% empirical confidence intervals, and grey histograms refer to distribution of daily temperatures.

**Figure S19. Regional cumulative temperature–enteric infection hospital admission associations using weather stations daily mean temperatures for 2014–2017 (sensitivity analysis).** Solid lines refer to mean relative risks, dashed lines refer to minimum risk temperatures, shaded regions refer to 95% empirical confidence intervals, and grey histograms refer to distribution of daily temperatures.

**Figure S20. General circulation model-ensemble temperature-attributable fractions of enteric infections relative to 2010–2019 by outcome in the Philippines using weather stations data (sensitivity analysis).** Striped bars refer to high temperature-attributable enteric infections, dotted bars refer to low temperature-attributable enteric infections, black circles refer to total temperature-attributable enteric infections, and error bars refer to 95%eCI.
